# Supplementary material for: Co-option and neofunctionalization of stomatal executors for defense against herbivores in Brassicales
Source: Research Square preprint supplement (doi:10.21203/rs.3.rs-3632546/v1), 2023-12-11
Supplement: Supplementary file 1 [file Supplementary_table1_231018.xlsx]

## Sheet: 8h
gene list							5	10	9	14	20	65		2	2	3	8		2
estro8h_up	estro24h_up	ice1_down	syp22_up	scrm-D_up			8h vs ice1	8h vs syp22	8h vs scrm-D	ice1 vs syp22	ice1 vs scrm-D	syp22 vs scrm_D		8h vs ic1 vs syp22	8h vs ic1 vs scrm-D	8h vs syp22 vs scrm-D	ice1 vs syp22 vs scrm-D		8h vs ice1 vs syp22 vs scrm-D
161 genes	248 genes	154 genes	931 genes	421 genes			At1g29270	At1g53470	At1g65690	At1g04920	At1g04800	AT5G01540		At3g24140	At3g24140	At2g39920	At1g71050		At3g24140
At1g03110	At3g24140	At1g04610	A_84_P134315	AT1G25450			At2g32990	At1g73010	At2g39920	At1g71050	At1g21540	AT5G65590		At3g57600	At3g57600	At3g24140	At3g24140		At3g57600
At1g05240	At3g18000	At1g04800	A_84_P154985	AT5G01540			At3g24140	At2g11810	At3g03680	At2g10608	At1g33811	AT2G26020				At3g57600	At3g57600
At1g05250	At3g17998	At1g04920	A_84_P159935	AT2G38530			At3g57600	At2g39920	At3g24140	At3g12580	At1g71050	AT5G38900					At5g26000
At1g10030	At5g25980	At1g08650	A_84_P175984	AT3G49960			At4g30660	At2g43590	At3g57600	At3g21560	At2g20875	AT5G39580					At5g39160
At1g14060	At3g57600	At1g09980	A_84_P224739	AT3G22060				At3g13940	At4g02270	At3g24140	At2g42610	AT4G23220					At5g39190
At1g14600	At1g71050	At1g10640	A_84_P230039	AT3G18080				At3g24140	At4g26010	At3g57600	At3g17070	AT3G12500					At5g65590
At1g18980	At5g05340	At1g11600	A_84_P514078	AT5G65590				At3g57600	At5g22740	At3g58000	At3g23840	AT4G12490					At5g66400
At1g19115	At2g27389	At1g11720	A_84_P736589	AT5G05600				At4g00770	At5g24090	At5g26000	At3g24140	AT5G43020
At1g20450	At1g24020	At1g11850	A_84_P750479	AT1G11340				At5g45580		At5g39160	At3g57600	AT3G25620
At1g21090	At1g11850	At1g21540	A_84_P751396	AT4G08770						At5g39190	At4g18280	AT1G11450
At1g23720	At3g25220	At1g22690	A_84_P751456	AT4G14480						At5g53870	At5g18430	AT3G24140
At1g23980	At2g34810	At1g23935	A_84_P751780	AT1G26420						At5g65590	At5g19580	AT5G57530
At1g26240	At3g23830	At1g24577	A_84_P754907	AT2G37540						At5g66400	At5g26000	AT2G43510
At1g26880	At2g33790	At1g27710	A_84_P755056	AT1G77380							At5g39160	AT4G35070
At1g29270	At1g57820	At1g29270	A_84_P755640	AT4G11290							At5g39190	AT3G05640
At1g31850	At1g62560	At1g33430	A_84_P756314	AT2G27690							At5g46240	AT5G62850
At1g36640	At4g29400	At1g33811	A_84_P757659	AT2G23620							At5g62080	AT5G26000
At1g41830	At1g19570	At1g48100	A_84_P759026	AT4G36700							At5g65590	AT5G40780
At1g44800	At3g46230	At1g48330	A_84_P759055	AT3G42570							At5g66400	AT2G45890
At1g48400	At2g26010	At1g51080	A_84_P759709	AT3G44320								AT1G77020
At1g49410	At3g08770	At1g53480	A_84_P760232	AT1G12480								AT2G39920
At1g53470	At1g29270	At1g53490	A_84_P760396	AT2G46430								AT1G01250
At1g56110	At5g26780	At1g57610	A_84_P762920	AT2G26020								AT5G02540
At1g59730	At3g13310	At1g61070	A_84_P763177	AT3G19010								AT5G64120
At1g60390	At1g52410	At1g62330	A_84_P763330	AT5G38900								AT2G18660
At1g60790	At4g38740	At1g64390	A_84_P763435	AT5G44390								AT4G22470
At1g61930	At5g40590	At1g67410	A_84_P763480	AT3G29250								AT2G02990
At1g64185	At2g43570	At1g67750	A_84_P766231	AT5G10760								AT2G39030
At1g65690	At1g27450	At1g68560	A_84_P766724	AT5G01500								AT1G51800
At1g66400	At3g59930	At1g69260	A_84_P766927	AT5G39580								AT2G31940
At1g66700	At1g53540	At1g69320	A_84_P767178	AT4G23300								AT1G52890
At1g67360	At5g66690	At1g71050	A_84_P844896	AT5G47990								AT4G11890
At1g70280	At1g06640	At1g72500	A_84_P847801	AT1G74010								AT2G29350
At1g70600	At3g25230	At1g80080	A_84_P848023	AT5G06750								AT2G46070
At1g73010	At3g53870	At1g80310	A_84_P851895	AT5G59310								AT1G30720
At1g74500	At1g71780	At2g03090	AGL57	AT2G42280								AT1G71050
At1g75560	At2g30766	At2g10608	AGP9	AT3G30720								AT4G02280
At1g78040	At2g33380	At2g15090	AI993127	AT1G28010								AT2G39200
At2g01200	At2g27390	At2g15120	AK220677	AT1G53035								AT4G09420
At2g03360	At3g10530	At2g20875	AK230425	AT2G37300								AT2G34810
At2g11810	At5g49945	At2g21380	anac011	AT3G53720								AT1G61120
At2g12646	At2g35980	At2g23340	ANAC019	AT2G27920								AT4G24480
At2g15000	At3g18510	At2g28410	AT-HSFA6B	AT4G08780								AT3G57600
At2g16570	At5g12030	At2g28720	AT1G01250	AT1G12030								AT3G62680
At2g19880	At3g54470	At2g31360	AT1G02360	AT4G37530								AT2G33380
At2g22470	At1g30700	At2g32990	AT1G02405	AT4G37580								AT3G03640
At2g25210	At3g10940	At2g36350	AT1G02820	AT2G39510								AT5G17760
At2g28790	At1g09310	At2g38170	AT1G03440	AT4G23220								AT5G66400
At2g29540	At4g01070	At2g39800	AT1G03590	AT3G12500								AT1G19610
At2g29980	At2g15490	At2g42530	AT1G04180	AT4G13210								AT4G23810
At2g30750	At3g56220	At2g42540	AT1G04920	AT3G23410								AT3G02480
At2g32380	At4g00090	At2g42610	AT1G05340	AT4G22590								AT4G19680
At2g32990	At3g23450	At2g43018	AT1G06148	AT4G12490								AT5G39160
At2g33570	At1g74310	At2g43020	AT1G06475	AT5G53890								AT5G48485
At2g33790	At2g46240	At2g45450	AT1G06540	AT5G60950								AT5G44420
At2g33847	At1g07830	At2g47040	AT1G07050	AT4G26200								AT2G45220
At2g35860	At4g16370	At2g47440	AT1G07160	AT2G30250								AT1G03440
At2g35980	At5g16940	At3g01345	AT1G07500	AT5G11410								AT4G21830
At2g36026	At3g13470	At3g02000	AT1G07747	AT1G33811								AT5G39190
At2g36830	At5g44720	At3g02310	AT1G07901	AT1G65390								AT5G39130
At2g37690	At1g18250	At3g04710	AT1G08695	AT2G26440								AT5G25980
At2g37990	At5g01015	At3g05690	AT1G08840	AT5G38780								AT1G30730
At2g38360	At1g70890	At3g07850	AT1G09240	AT3G21230								AT2G32210
At2g39020	At5g14590	At3g09440	AT1G09460	AT3G50480								AT1G11460
At2g39920	At4g34700	At3g10530	AT1G10585	AT5G43020
At2g40475	At5g14580	At3g12580	AT1G10610	AT1G24400
At2g43590	At5g03300	At3g14040	AT1G10770	AT4G30290
At2g44520	At2g26150	At3g17010	AT1G11450	AT3G25620
At2g44670	At5g56030	At3g17070	AT1G11460	AT1G78780
At2g47110	At2g18020	At3g21560	AT1G11470	AT1G80130
At3g01390	At2g37990	At3g23840	AT1G11490	AT1G76930
At3g02030	At1g79550	At3g24140	AT1G11765	AT4G01720
At3g02350	At1g29980	At3g26290	AT1G12940	AT2G25000
At3g03250	At5g23820	At3g26744	AT1G13340	AT4G01250
At3g03680	At1g14980	At3g30110	AT1G13530	AT3G57260
At3g05060	At5g06730	At3g30180	AT1G13755	AT2G13610
At3g05490	At5g11150	At3g42960	AT1G14460	AT4G26010
At3g05890	At3g54600	At3g45140	AT1G14540	AT4G39030
At3g07080	At2g17360	At3g47360	AT1G15010	AT2G43620
At3g12860	At1g06475	At3g48810	AT1G15330	AT3G17998
At3g13230	At1g58160	At3g49540	AT1G15380	AT1G11450
At3g13310	At3g14900	At3g49570	AT1G15620	AT4G09500
At3g13520	At4g36010	At3g54820	AT1G15757	AT5G37500
At3g13940	At5g02050	At3g57600	AT1G16370	AT5G46330
At3g15010	At4g33865	At3g57690	AT1G16850	AT3G24140
At3g15300	At4g13850	At3g58000	AT1G16960	AT2G31880
At3g16050	At4g30800	At3g62230	AT1G17710	AT4G12290
At3g16780	At4g18440	At3g63210	AT1G18050	AT5G57530
At3g21540	At1g17180	At4g00110	AT1G18382	AT4G18050
At3g22230	At3g27080	At4g02890	AT1G19160	AT2G43510
At3g23810	At4g10480	At4g04610	AT1G19390	AT4G02330
At3g23820	At2g14750	At4g08910	AT1G19610	AT4G35070
At3g23830	At1g72170	At4g09020	AT1G19620	AT3G28960
At3g24140	At2g40550	At4g11160	AT1G20310	AT2G42360
At3g25290	At3g53480	At4g14080	AT1G21245	AT1G02930
At3g28200	At5g23290	At4g15440	AT1G21360	AT2G44480
At3g29360	At1g41880	At4g16270	AT1G21510	AT2G43530
At3g49010	At1g64880	At4g17550	AT1G22110	AT2G25510
At3g51680	At2g20360	At4g18280	AT1G22230	AT5G58580
At3g52930	At1g76790	At4g19110	AT1G23170	AT4G23260
At3g57600	At3g01790	At4g19120	AT1G23540	AT5G48000
At3g58010	At2g19720	At4g20320	AT1G23550	AT5G49520
At3g59540	At1g74210	At4g23680	AT1G23660	AT4G08470
At3g62110	At5g56010	At4g25420	AT1G24270	AT1G65690
At3g63160	At5g10010	At4g29980	AT1G25270	AT4G15210
At4g00310	At1g26910	At4g30250	AT1G25310	AT2G32690
At4g00770	At3g20470	At4g30650	AT1G26450	AT4G02940
At4g01480	At1g15385	At4g30660	AT1G27213	AT3G18280
At4g02270	At5g59320	At4g31805	AT1G27490	AT3G05640
At4g02360	At3g53890	At4g32208	AT1G27670	AT2G38300
At4g02500	At5g12110	At4g36870	AT1G27680	AT4G25820
At4g04910	At3g10185	At4g37870	AT1G28500	AT3G16150
At4g15770	At1g18630	At4g37980	AT1G29290	AT2G21080
At4g16720	At2g44160	At4g40020	AT1G30040	AT5G62850
At4g18422	At1g78370	At5g02500	AT1G30135	AT1G59960
At4g25630	At4g25740	At5g06190	AT1G30370	AT5G03350
At4g26010	At3g62990	At5g07230	AT1G30720	AT5G26000
At4g26670	At2g27840	At5g08130	AT1G30730	AT4G17070
At4g26690	At2g35790	At5g09590	AT1G30740	AT3G10040
At4g27950	At3g25730	At5g10140	AT1G30920	AT4G01430
At4g30660	At3g04960	At5g15160	AT1G32350	AT2G26040
At4g32390	At4g32470	At5g15230	AT1G33470	AT1G62980
At4g34490	At1g67500	At5g15960	AT1G34050	AT4G01700
At4g35320	At5g05960	At5g15970	AT1G34410	AT2G24520
At4g38620	At1g61580	At5g18430	AT1G34790	AT1G07720
At4g39050	At4g17970	At5g19580	AT1G35625	AT4G08850
At4g40090	At5g61170	At5g22500	AT1G35910	AT1G21540
At5g01640	At2g27710	At5g26000	AT1G36060	AT1G79770
At5g06265	At2g28420	At5g28300	AT1G36960	AT4G18280
At5g06630	At2g30770	At5g38690	AT1G37150	AT4G34230
At5g07030	At1g73620	At5g39160	AT1G41875	AT3G23840
At5g07180	At5g05580	At5g39190	AT1G42080	AT1G06620
At5g09510	At1g14810	At5g43500	AT1G43000	AT5G40780
At5g09810	At3g18760	At5g44550	AT1G44608	AT5G06760
At5g10020	At5g14030	At5g45880	AT1G45063	AT4G21620
At5g11740	At3g59820	At5g46220	AT1G49000	AT2G14900
At5g14040	At1g13590	At5g46240	AT1G49100	AT3G20470
At5g15490	At1g52000	At5g48570	AT1G49250	AT2G45890
At5g15650	At5g61030	At5g48730	AT1G49715	AT1G77020
At5g20410	At1g16960	At5g52310	AT1G49832	AT2G16630
At5g20790	At1g23020	At5g53870	AT1G50040	AT2G39920
At5g22440	At5g65360	At5g56010	AT1G50470	AT1G01250
At5g22650	At2g23120	At5g56030	AT1G50830	AT4G27730
At5g22740	At5g26000	At5g56860	AT1G51260	AT2G24850
At5g23860	At1g34350	At5g57123	AT1G51410	AT5G02540
At5g24020	At2g39280	At5g57685	AT1G51800	AT5G47880
At5g24090	At5g08020	At5g60890	AT1G52140	AT5G64120
At5g27770	At2g20980	At5g62080	AT1G52855	AT1G62790
At5g37990	At1g03310	At5g62280	AT1G52890	AT5G61520
At5g40590	At5g47930	At5g63350	AT1G52940	AT3G50900
At5g45580	At4g33490	At5g64770	AT1G53030	AT2G23680
At5g46290	At5g40130	At5g65590	AT1G53080	AT2G32190
At5g51570	At5g56000	At5g66400	AT1G53360	AT1G19180
At5g53830	At3g59390	At5g67390	AT1G53470	AT3G03680
At5g55480	At5g48070		AT1G53540	AT5G38030
At5g55730	At4g01240		AT1G53610	AT1G68600
At5g56630	At2g15000		AT1G54230	AT1G51790
At5g60670	At5g09650		AT1G54420	AT1G74790
At5g60980	At5g23740		AT1G55010	AT1G04800
At5g65160	At3g49780		AT1G55660	AT1G14960
At5g66690	At4g13770		AT1G55928	AT5G43330
	At4g28510		AT1G56240	AT1G34510
	At2g33210		AT1G57775	AT4G25260
	At2g21170		AT1G58190	AT2G18660
	At2g15290		AT1G58330	AT5G18470
	At2g34300		AT1G58420	AT3G02550
	At1g51760		AT1G59865	AT4G22470
	At2g15840		AT1G59930	AT1G12320
	At1g08005		AT1G61120	AT2G04570
	At2g43120		AT1G61360	AT5G47980
	At5g47700		AT1G61540	AT2G43520
	At5g24090		AT1G61550	AT4G36670
	At3g44590		AT1G61563	AT2G02990
	At3g12370		AT1G61680	AT3G17130
	At2g43530		AT1G61920	AT3G18250
	At5g43330		AT1G62210	AT4G24130
	At3g06320		AT1G62410	AT5G62080
	At3g13860		AT1G62440	AT5G25440
	At1g06380		AT1G62510	AT1G64170
	At2g39310		AT1G63180	AT1G11580
	At2g46000		AT1G63190	AT2G42610
	At3g44610		AT1G64010	AT5G10380
	At5g57410		AT1G64065	AT4G12550
	At1g54217		AT1G64110	AT4G03010
	At5g10830		AT1G64380	AT1G69230
	At4g23670		AT1G64660	AT1G70710
	At3g44750		AT1G65140	AT2G05440
	At2g44065		AT1G65240	AT2G39030
	At4g36240		AT1G65330	AT4G12470
	At4g02930		AT1G65610	AT2G04160
	At3g02220		AT1G65845	AT1G51800
	At2g47140		AT1G65910	AT1G75040
	At5g03160		AT1G66390	AT3G44860
	At3g22660		AT1G66780	AT2G31940
	At2g27020		AT1G67000	AT4G38810
	At1g19670		AT1G67070	AT2G02850
	At5g01530		AT1G67290	AT1G52890
	At2g43420		AT1G67770	AT1G74210
	At5g24770		AT1G68110	AT1G02220
	At4g31805		AT1G68240	AT4G00680
	At3g16480		AT1G69050	AT1G76190
	At3g25770		AT1G69572	AT4G11890
	At2g33320		AT1G70020	AT1G30870
	At5g09740		AT1G70120	AT1G06640
	At3g16450		AT1G70220	AT1G60630
	At1g56110		AT1G70640	AT2G44450
	At5g60350		AT1G71000	AT2G29350
	At1g30760		AT1G71050	AT1G53060
	At2g27550		AT1G72060	AT4G18290
	At1g52270		AT1G73010	AT5G24210
	At4g38620		AT1G73160	AT3G26320
	At2g15320		AT1G74055	AT5G46240
	At3g18420		AT1G75390	AT5G44130
	At3g53740		AT1G75490	AT2G46070
	At1g52700		AT1G75930	AT1G65500
	At3g10110		AT1G77020	AT5G53550
	At1g58380		AT1G77640	AT1G30720
	At3g20390		AT1G77960	AT1G71050
	At1g16160		AT1G78110	AT3G50340
	At1g66080		AT1G78410	AT4G02280
	At5g06390		AT1G79640	AT2G43570
	At4g26370		AT1G80160	AT4G08950
	At2g38050		AT1G80470	AT2G39200
	At5g28646		AT2G01800	AT2G40260
	At1g34030		AT2G02230	AT4G23210
	At4g22930		AT2G02240	AT1G04110
	At1g11870		AT2G02250	AT4G23600
	At5g48570		AT2G02520	AT2G15080
	At4g12880		AT2G02640	AT3G03640
	At1g20050		AT2G02990	AT5G17760
	At3g52370		AT2G04038	AT4G33050
	At5g58600		AT2G04920	AT5G26260
	At4g11320		AT2G05410	AT5G66400
	At5g60530		AT2G05645	AT5G58670
	At1g79530		AT2G10608	AT5G25840
	At2g06050		AT2G11623	AT2G44460
	At4g31000		AT2G11810	AT4G11650
	At3g50890		AT2G13272	AT5G26340
	At1g56190		AT2G13547	AT1G23200
	At5g45280		AT2G13640	AT5G15120
	At1g62520		AT2G13720	AT4G09420
	At5g56670		AT2G14100	AT3G22840
	At2g46060		AT2G14610	AT4G36430
	At5g20190		AT2G14935	AT5G55050
	At5g25080		AT2G15130	AT4G16260
	At4g21880		AT2G15170	AT3G51430
	At3g05280		AT2G15830	AT4G10955
	At4g36360		AT2G17305	AT2G28870
			AT2G17750	AT3G51450
			AT2G18080	AT3G60420
			AT2G18100	AT5G48540
			AT2G18660	AT4G02270
			AT2G18690	AT1G61800
			AT2G19190	AT5G57050
			AT2G21560	AT2G06050
			AT2G22810	AT3G26830
			AT2G22850	AT3G14210
			AT2G22860	AT3G02240
			AT2G23110	AT2G43535
			AT2G24000	AT5G26220
			AT2G24740	AT3G20300
			AT2G25185	AT1G73805
			AT2G25240	AT2G19460
			AT2G25330	AT3G51760
			AT2G25680	AT1G75880
			AT2G25730	AT2G34810
			AT2G25770	AT4G22753
			AT2G25780	AT3G10280
			AT2G26010	AT1G61120
			AT2G26020	AT4G24480
			AT2G26050	AT1G19380
			AT2G26150	AT2G45290
			AT2G26267	AT5G66460
			AT2G26610	AT1G24530
			AT2G26620	AT1G62400
			AT2G27240	AT3G57600
			AT2G27775	AT3G62680
			AT2G28420	AT1G43910
			AT2G28570	AT3G28930
			AT2G28810	AT3G16030
			AT2G29350	AT4G05390
			AT2G29500	AT5G22740
			AT2G29995	AT2G38870
			AT2G30150	AT1G24260
			AT2G30770	AT3G19930
			AT2G31082	AT1G69880
			AT2G31900	AT1G66920
			AT2G31940	AT2G33380
			AT2G31945	AT4G17970
			AT2G32200	AT4G24340
			AT2G32210	AT3G51860
			AT2G32270	AT5G47550
			AT2G33190	AT5G04960
			AT2G33380	AT4G13345
			AT2G33750	AT4G10270
			AT2G33830	AT4G12500
			AT2G34030	AT3G57240
			AT2G34230	AT5G58570
			AT2G34655	AT1G51890
			AT2G34810	AT5G23840
			AT2G35710	AT1G19610
			AT2G35950	AT5G64570
			AT2G36110	AT2G22970
			AT2G36325	AT5G24090
			AT2G36450	AT5G52750
			AT2G36560	AT5G23020
			AT2G36640	AT5G65870
			AT2G37050	AT1G08810
			AT2G37180	AT2G21880
			AT2G37430	AT2G21590
			AT2G37670	AT3G49620
			AT2G37770	AT3G26170
			AT2G38250	AT4G20050
			AT2G38900	AT3G28540
			AT2G38910	AT4G21680
			AT2G38940	AT1G79530
			AT2G39030	AT5G19580
			AT2G39200	AT3G14620
			AT2G39300	AT4G23140
			AT2G39920	AT5G67400
			AT2G40180	AT4G12430
			AT2G40340	AT1G07390
			AT2G40350	AT4G23810
			AT2G40740	AT3G04720
			AT2G41225	AT3G02480
			AT2G41260	AT5G52810
			AT2G41280	AT5G42860
			AT2G42170	AT4G39210
			AT2G42180	AT3G62820
			AT2G42640	AT3G46280
			AT2G43510	AT1G35710
			AT2G43590	AT5G55450
			AT2G43745	AT2G34930
			AT2G44470	AT2G20875
			AT2G44735	AT1G73260
			AT2G45023	AT4G24510
			AT2G45130	AT5G59320
			AT2G45220	AT1G72910
			AT2G45412	AT1G78530
			AT2G45890	AT5G36220
			AT2G46070	AT4G22212
			AT2G46790	AT5G06870
			AT2G46880	AT1G33960
			AT2G47260	AT3G51660
			AT2G47270	AT2G39690
			AT2G47480	AT2G39210
			AT2G47485	AT1G17230
			AT2G47560	AT4G25810
			AT2G47770	AT2G29120
			AT3G01600	AT4G12480
			AT3G02480	AT5G46050
			AT3G02840	AT4G19680
			AT3G02990	AT3G15350
			AT3G03260	AT5G18430
			AT3G03341	AT2G21140
			AT3G03530	AT4G31800
			AT3G03640	AT4G14365
			AT3G03660	AT1G51850
			AT3G03700	AT5G39160
			AT3G03726	AT1G24470
			AT3G05320	AT5G05500
			AT3G05540	AT1G10060
			AT3G05640	AT2G30500
			AT3G05727	AT4G33950
			AT3G05860	AT5G48485
			AT3G05975	AT2G44570
			AT3G06360	AT5G04950
			AT3G06490	AT4G26830
			AT3G09620	AT5G44420
			AT3G09730	AT3G09940
			AT3G10930	AT3G15720
			AT3G11930	AT4G24040
			AT3G12500	AT5G50200
			AT3G12502	AT5G44820
			AT3G12580	AT5G61160
			AT3G13940	AT5G06530
			AT3G14300	AT2G45220
			AT3G14570	AT2G41230
			AT3G14780	AT5G35190
			AT3G14950	AT4G38420
			AT3G15440	AT1G17420
			AT3G15534	AT5G14920
			AT3G15910	AT2G02930
			AT3G16330	AT4G16563
			AT3G16340	AT2G29940
			AT3G16600	AT2G35760
			AT3G16895	AT1G03440
			AT3G16900	AT3G47480
			AT3G17690	AT4G25110
			AT3G19350	AT4G21830
			AT3G19615	AT2G13570
			AT3G20015	AT4G24140
			AT3G20130	AT4G21850
			AT3G20340	AT3G26210
			AT3G20555	AT1G01900
			AT3G20850	AT3G17070
			AT3G21320	AT4G21840
			AT3G21330	AT4G02520
			AT3G21560	AT5G39190
			AT3G21840	AT5G39130
			AT3G22570	AT1G72930
			AT3G22690	AT4G12432
			AT3G23380	AT4G23160
			AT3G23730	AT1G16300
			AT3G24140	AT3G26180
			AT3G24270	AT4G24350
			AT3G24715	AT3G44870
			AT3G25240	AT1G66910
			AT3G25620	AT2G46720
			AT3G26390	AT4G10960
			AT3G27027	AT5G25980
			AT3G27250	AT1G30730
			AT3G27785	AT2G05510
			AT3G27970	AT2G32210
			AT3G28210	AT1G02920
			AT3G28360	AT4G12280
			AT3G28490	AT2G46440
			AT3G28550	AT4G37520
			AT3G29763	AT4G22592
			AT3G31415	AT3G18000
			AT3G32030	AT1G11460
			AT3G42130
			AT3G42473
			AT3G42990
			AT3G43148
			AT3G43480
			AT3G43950
			AT3G44171
			AT3G44428
			AT3G44510
			AT3G44760
			AT3G45790
			AT3G45810
			AT3G46230
			AT3G46300
			AT3G47030
			AT3G47100
			AT3G47190
			AT3G47543
			AT3G47770
			AT3G48510
			AT3G48640
			AT3G48650
			AT3G48770
			AT3G48850
			AT3G48960
			AT3G49120
			AT3G49480
			AT3G49630
			AT3G49970
			AT3G50130
			AT3G50450
			AT3G51400
			AT3G52072
			AT3G52490
			AT3G52520
			AT3G52748
			AT3G53200
			AT3G53250
			AT3G55370
			AT3G55672
			AT3G55840
			AT3G55970
			AT3G56180
			AT3G56210
			AT3G56620
			AT3G57600
			AT3G57840
			AT3G58000
			AT3G58240
			AT3G58640
			AT3G59030
			AT3G59100
			AT3G59510
			AT3G59880
			AT3G60720
			AT3G61230
			AT3G61410
			AT3G61571
			AT3G61660
			AT3G61990
			AT3G62570
			AT3G62680
			AT3G62690
			AT3G62860
			AT3G63050
			AT4G00770
			AT4G00970
			AT4G01350
			AT4G01440
			AT4G01671
			AT4G01870
			AT4G02280
			AT4G03360
			AT4G03930
			AT4G04315
			AT4G04402
			AT4G04450
			AT4G04745
			AT4G05010
			AT4G05270
			AT4G05497
			AT4G06526
			AT4G06735
			AT4G08485
			AT4G08878
			AT4G09030
			AT4G09100
			AT4G09420
			AT4G09740
			AT4G09775
			AT4G09965
			AT4G10250
			AT4G10310
			AT4G10845
			AT4G10870
			AT4G11000
			AT4G11470
			AT4G11890
			AT4G12050
			AT4G12120
			AT4G12400
			AT4G12490
			AT4G13260
			AT4G13790
			AT4G14370
			AT4G14450
			AT4G14630
			AT4G14746
			AT4G15120
			AT4G15230
			AT4G15660
			AT4G15670
			AT4G15680
			AT4G15690
			AT4G15700
			AT4G16230
			AT4G16790
			AT4G18170
			AT4G18830
			AT4G19680
			AT4G19740
			AT4G19930
			AT4G20810
			AT4G20860
			AT4G20900
			AT4G21010
			AT4G21216
			AT4G21250
			AT4G21730
			AT4G21830
			AT4G22170
			AT4G22233
			AT4G22470
			AT4G22485
			AT4G22505
			AT4G22510
			AT4G22513
			AT4G22517
			AT4G22520
			AT4G22530
			AT4G23070
			AT4G23220
			AT4G23410
			AT4G23420
			AT4G23560
			AT4G23810
			AT4G24000
			AT4G24180
			AT4G24320
			AT4G24480
			AT4G24860
			AT4G25200
			AT4G26488
			AT4G26530
			AT4G26820
			AT4G26890
			AT4G27160
			AT4G27590
			AT4G27670
			AT4G27980
			AT4G28060
			AT4G28330
			AT4G28340
			AT4G28520
			AT4G28580
			AT4G28700
			AT4G28720
			AT4G28790
			AT4G28811
			AT4G29570
			AT4G30050
			AT4G30430
			AT4G31110
			AT4G31870
			AT4G32230
			AT4G32714
			AT4G33300
			AT4G33467
			AT4G33585
			AT4G35070
			AT4G35720
			AT4G36370
			AT4G36510
			AT4G36710
			AT4G36880
			AT4G37340
			AT4G37400
			AT4G37430
			AT4G37730
			AT4G37770
			AT4G37990
			AT4G38500
			AT4G39190
			AT4G39340
			AT4G39360
			AT4G39650
			AT4G39670
			AT4G39700
			AT4G39770
			AT4G39830
			AT4G39930
			AT4G40070
			AT5G01540
			AT5G01600
			AT5G01860
			AT5G02210
			AT5G02460
			AT5G02540
			AT5G02900
			AT5G03310
			AT5G03700
			AT5G03720
			AT5G03960
			AT5G05300
			AT5G05965
			AT5G06470
			AT5G06790
			AT5G06800
			AT5G07060
			AT5G07570
			AT5G08350
			AT5G10278
			AT5G10280
			AT5G10695
			AT5G11412
			AT5G12020
			AT5G12030
			AT5G13150
			AT5G13330
			AT5G13880
			AT5G14990
			AT5G15380
			AT5G16360
			AT5G17180
			AT5G17340
			AT5G17760
			AT5G17810
			AT5G17830
			AT5G17980
			AT5G18000
			AT5G19610
			AT5G21080
			AT5G22470
			AT5G23350
			AT5G23360
			AT5G23370
			AT5G23960
			AT5G23980
			AT5G24250
			AT5G24570
			AT5G24800
			AT5G25910
			AT5G25980
			AT5G26000
			AT5G26050
			AT5G26114
			AT5G26146
			AT5G26300
			AT5G26840
			AT5G27238
			AT5G27940
			AT5G27945
			AT5G28010
			AT5G28310
			AT5G28642
			AT5G28646
			AT5G33355
			AT5G34581
			AT5G35110
			AT5G35375
			AT5G35604
			AT5G35900
			AT5G36920
			AT5G36925
			AT5G37130
			AT5G37440
			AT5G37490
			AT5G37660
			AT5G37900
			AT5G38100
			AT5G38390
			AT5G38450
			AT5G38850
			AT5G38900
			AT5G38930
			AT5G38940
			AT5G39100
			AT5G39110
			AT5G39120
			AT5G39130
			AT5G39160
			AT5G39180
			AT5G39190
			AT5G39490
			AT5G39580
			AT5G39820
			AT5G39880
			AT5G40010
			AT5G40100
			AT5G40382
			AT5G40780
			AT5G40980
			AT5G41300
			AT5G41680
			AT5G41900
			AT5G42010
			AT5G42200
			AT5G42223
			AT5G42680
			AT5G42690
			AT5G42797
			AT5G42900
			AT5G42970
			AT5G43000
			AT5G43020
			AT5G43840
			AT5G43860
			AT5G44050
			AT5G44360
			AT5G44420
			AT5G44430
			AT5G44910
			AT5G45150
			AT5G45580
			AT5G45890
			AT5G46845
			AT5G46877
			AT5G46900
			AT5G47850
			AT5G47920
			AT5G48375
			AT5G48485
			AT5G50345
			AT5G50600
			AT5G50820
			AT5G51440
			AT5G51720
			AT5G51920
			AT5G52660
			AT5G53380
			AT5G53588
			AT5G53592
			AT5G53730
			AT5G53840
			AT5G53870
			AT5G53950
			AT5G53960
			AT5G54095
			AT5G55040
			AT5G55690
			AT5G55800
			AT5G56050
			AT5G56960
			AT5G57530
			AT5G57550
			AT5G58080
			AT5G59370
			AT5G59510
			AT5G59820
			AT5G60220
			AT5G60260
			AT5G60380
			AT5G60630
			AT5G61390
			AT5G61490
			AT5G61605
			AT5G61710
			AT5G61730
			AT5G61740
			AT5G61820
			AT5G62100
			AT5G62820
			AT5G62850
			AT5G63170
			AT5G64110
			AT5G64120
			AT5G64490
			AT5G64510
			AT5G64750
			AT5G65330
			AT5G65590
			AT5G66110
			AT5G66400
			AT5G66440
			ATHB5
			AV547204
			AV784391
			AY464629
			BE039502
			BP589684
			BP600644
			BP667360
			BT010770
			BU917423
			BX818802
			BX834370
			BX836338
			BX837662
			BX837964
			BX839866
			BX841465
			CA781222
			CAD1
			CB185540
			CD531672
			CD532105
			CD532179
			DQ108699
			DR355517
			DR368472
			DR376127
			EF183252
			EG424605
			EG438208
			EG439715
			EG465106
			EG482801
			EG491551
			EG497920
			EG511673
			FRS2
			GMII
			GSTF7
			MIR169G
			NP033841
			NP034659
			NP035776
			NP10636258
			NP162830
			NP180295
			NP190082
			NP206766
			NP207383
			NP207760
			NP214745
			NP221269
			NP221870
			NP222387
			NP226346
			NP226369
			NP226538
			NP226854
			NP227392
			NP230399
			NP235649
			NP236646
			NP281205
			NP305579
			NP306413
			NP306456
			NP306485
			NP306627
			NP339102
			NP453905
			NP454446
			NP454525
			NP454873
			NP456301
			SOT16
			TA27460_3702
			TA28168_3702
			TA29208_3702
			TA30401_3702
			TA31683_3702
			TA32296_3702
			TA34507_3702
			TA34859_3702
			TA35774_3702
			TA36872_3702
			TA38361_3702
			TA41847_3702
			TA42683_3702
			TA44628_3702
			TA45066_3702
			TA46212_3702
			TA46301_3702
			TA48629_3702
			TA49574_3702
			TA49640_3702
			TA51147_3702
			TA52169_3702
			TA52363_3702
			TA52672_3702
			TA53433_3702
			TA53446_3702
			TC358247
			TC362065
			TC365431
			TC371216
			TC372062
			TC374310
			TC375116
			TC375430
			TC376054
			TC382311
			TC384655
			TC387173
			TC388261
			TC390732
			TC394429
			TC395782
			TC396704
			TC396736
			TC398054
			TC400486
			TC406041
			UGT74B1
			UXS1
			ZIP5
			ZPR4

## Sheet: 24h
gene list							11	17	20	14	20	65		4	4	7	8		4
estro8h_up	estro24h_up	ice1_down	syp22_up	scrm-D_up			24h vs ic1	24h vs syp22	24h vs scrm-D	ice1 vs syp22	ice1 vs scrm-D	syp22 vs scrm_D		24h vs ic1 vs syp22	24h vs ic1 vs scrm-D	24h vs syp22 vs scrm-D	ice1 vs syp22 vs scrm-D		24h vs ice1 vs syp22 vs scrm-D
161 genes	248 genes	154 genes	931 genes	421genes			At1g11850	At3g24140	At3g24140	At1g04920	At1g04800	AT5G01540		At1g71050	At1g71050	At3g24140	At1g71050		At1g71050
At1g03110	At3g24140	At1g04610	A_84_P134315	AT1G25450			At1g29270	At5g25980	At3g18000	At1g71050	At1g21540	AT5G65590		At3g24140	At3g24140	At5g25980	At3g24140		At3g24140
At1g05240	At3g18000	At1g04800	A_84_P154985	AT5G01540			At1g71050	At3g57600	At3g17998	At2g10608	At1g33811	AT2G26020		At3g57600	At3g57600	At3g57600	At3g57600		At3g57600
At1g05250	At3g17998	At1g04920	A_84_P159935	AT2G38530			At3g10530	At1g71050	At5g25980	At3g12580	At1g71050	AT5G38900		At5g26000	At5g26000	At1g71050	At5g26000		At5g26000
At1g10030	At5g25980	At1g08650	A_84_P175984	AT3G49960			At3g24140	At2g34810	At3g57600	At3g21560	At2g20875	AT5G39580				At2g34810	At5g39160
At1g14060	At3g57600	At1g09980	A_84_P224739	AT3G22060			At3g57600	At3g46230	At1g71050	At3g24140	At2g42610	AT4G23220				At2g33380	At5g39190
At1g14600	At1g71050	At1g10640	A_84_P230039	AT3G18080			At4g31805	At2g26010	At2g34810	At3g57600	At3g17070	AT3G12500				At5g26000	At5g65590
At1g18980	At5g05340	At1g11600	A_84_P514078	AT5G65590			At5g26000	At1g53540	At2g43570	At3g58000	At3g23840	AT4G12490					At5g66400
At1g19115	At2g27389	At1g11720	A_84_P736589	AT5G05600			At5g48570	At2g33380	At1g06640	At5g26000	At3g24140	AT5G43020
At1g20450	At1g24020	At1g11850	A_84_P750479	AT1G11340			At5g56010	At5g12030	At2g33380	At5g39160	At3g57600	AT3G25620
At1g21090	At1g11850	At1g21540	A_84_P751396	AT4G08770			At5g56030	At2g26150	At1g74210	At5g39190	At4g18280	AT1G11450
At1g23720	At3g25220	At1g22690	A_84_P751456	AT4G14480				At1g06475	At3g20470	At5g53870	At5g18430	AT3G24140
At1g23980	At2g34810	At1g23935	A_84_P751780	AT1G26420				At2g28420	At5g59320	At5g65590	At5g19580	AT5G57530
At1g26240	At3g23830	At1g24577	A_84_P754907	AT2G37540				At2g30770	At4g17970	At5g66400	At5g26000	AT2G43510
At1g26880	At2g33790	At1g27710	A_84_P755056	AT1G77380				At1g16960	At5g26000		At5g39160	AT4G35070
At1g29270	At1g57820	At1g29270	A_84_P755640	AT4G11290				At5g26000	At5g24090		At5g39190	AT3G05640
At1g31850	At1g62560	At1g33430	A_84_P756314	AT2G27690				At5g28646	At2g43530		At5g46240	AT5G62850
At1g36640	At4g29400	At1g33811	A_84_P757659	AT2G23620					At5g43330		At5g62080	AT5G26000
At1g41830	At1g19570	At1g48100	A_84_P759026	AT4G36700					At1g79530		At5g65590	AT5G40780
At1g44800	At3g46230	At1g48330	A_84_P759055	AT3G42570					At2g06050		At5g66400	AT2G45890
At1g48400	At2g26010	At1g51080	A_84_P759709	AT3G44320								AT1G77020
At1g49410	At3g08770	At1g53480	A_84_P760232	AT1G12480								AT2G39920
At1g53470	At1g29270	At1g53490	A_84_P760396	AT2G46430								AT1G01250
At1g56110	At5g26780	At1g57610	A_84_P762920	AT2G26020								AT5G02540
At1g59730	At3g13310	At1g61070	A_84_P763177	AT3G19010								AT5G64120
At1g60390	At1g52410	At1g62330	A_84_P763330	AT5G38900								AT2G18660
At1g60790	At4g38740	At1g64390	A_84_P763435	AT5G44390								AT4G22470
At1g61930	At5g40590	At1g67410	A_84_P763480	AT3G29250								AT2G02990
At1g64185	At2g43570	At1g67750	A_84_P766231	AT5G10760								AT2G39030
At1g65690	At1g27450	At1g68560	A_84_P766724	AT5G01500								AT1G51800
At1g66400	At3g59930	At1g69260	A_84_P766927	AT5G39580								AT2G31940
At1g66700	At1g53540	At1g69320	A_84_P767178	AT4G23300								AT1G52890
At1g67360	At5g66690	At1g71050	A_84_P844896	AT5G47990								AT4G11890
At1g70280	At1g06640	At1g72500	A_84_P847801	AT1G74010								AT2G29350
At1g70600	At3g25230	At1g80080	A_84_P848023	AT5G06750								AT2G46070
At1g73010	At3g53870	At1g80310	A_84_P851895	AT5G59310								AT1G30720
At1g74500	At1g71780	At2g03090	AGL57	AT2G42280								AT1G71050
At1g75560	At2g30766	At2g10608	AGP9	AT3G30720								AT4G02280
At1g78040	At2g33380	At2g15090	AI993127	AT1G28010								AT2G39200
At2g01200	At2g27390	At2g15120	AK220677	AT1G53035								AT4G09420
At2g03360	At3g10530	At2g20875	AK230425	AT2G37300								AT2G34810
At2g11810	At5g49945	At2g21380	anac011	AT3G53720								AT1G61120
At2g12646	At2g35980	At2g23340	ANAC019	AT2G27920								AT4G24480
At2g15000	At3g18510	At2g28410	AT-HSFA6B	AT4G08780								AT3G57600
At2g16570	At5g12030	At2g28720	AT1G01250	AT1G12030								AT3G62680
At2g19880	At3g54470	At2g31360	AT1G02360	AT4G37530								AT2G33380
At2g22470	At1g30700	At2g32990	AT1G02405	AT4G37580								AT3G03640
At2g25210	At3g10940	At2g36350	AT1G02820	AT2G39510								AT5G17760
At2g28790	At1g09310	At2g38170	AT1G03440	AT4G23220								AT5G66400
At2g29540	At4g01070	At2g39800	AT1G03590	AT3G12500								AT1G19610
At2g29980	At2g15490	At2g42530	AT1G04180	AT4G13210								AT4G23810
At2g30750	At3g56220	At2g42540	AT1G04920	AT3G23410								AT3G02480
At2g32380	At4g00090	At2g42610	AT1G05340	AT4G22590								AT4G19680
At2g32990	At3g23450	At2g43018	AT1G06148	AT4G12490								AT5G39160
At2g33570	At1g74310	At2g43020	AT1G06475	AT5G53890								AT5G48485
At2g33790	At2g46240	At2g45450	AT1G06540	AT5G60950								AT5G44420
At2g33847	At1g07830	At2g47040	AT1G07050	AT4G26200								AT2G45220
At2g35860	At4g16370	At2g47440	AT1G07160	AT2G30250								AT1G03440
At2g35980	At5g16940	At3g01345	AT1G07500	AT5G11410								AT4G21830
At2g36026	At3g13470	At3g02000	AT1G07747	AT1G33811								AT5G39190
At2g36830	At5g44720	At3g02310	AT1G07901	AT1G65390								AT5G39130
At2g37690	At1g18250	At3g04710	AT1G08695	AT2G26440								AT5G25980
At2g37990	At5g01015	At3g05690	AT1G08840	AT5G38780								AT1G30730
At2g38360	At1g70890	At3g07850	AT1G09240	AT3G21230								AT2G32210
At2g39020	At5g14590	At3g09440	AT1G09460	AT3G50480								AT1G11460
At2g39920	At4g34700	At3g10530	AT1G10585	AT5G43020
At2g40475	At5g14580	At3g12580	AT1G10610	AT1G24400
At2g43590	At5g03300	At3g14040	AT1G10770	AT4G30290
At2g44520	At2g26150	At3g17010	AT1G11450	AT3G25620
At2g44670	At5g56030	At3g17070	AT1G11460	AT1G78780
At2g47110	At2g18020	At3g21560	AT1G11470	AT1G80130
At3g01390	At2g37990	At3g23840	AT1G11490	AT1G76930
At3g02030	At1g79550	At3g24140	AT1G11765	AT4G01720
At3g02350	At1g29980	At3g26290	AT1G12940	AT2G25000
At3g03250	At5g23820	At3g26744	AT1G13340	AT4G01250
At3g03680	At1g14980	At3g30110	AT1G13530	AT3G57260
At3g05060	At5g06730	At3g30180	AT1G13755	AT2G13610
At3g05490	At5g11150	At3g42960	AT1G14460	AT4G26010
At3g05890	At3g54600	At3g45140	AT1G14540	AT4G39030
At3g07080	At2g17360	At3g47360	AT1G15010	AT2G43620
At3g12860	At1g06475	At3g48810	AT1G15330	AT3G17998
At3g13230	At1g58160	At3g49540	AT1G15380	AT1G11450
At3g13310	At3g14900	At3g49570	AT1G15620	AT4G09500
At3g13520	At4g36010	At3g54820	AT1G15757	AT5G37500
At3g13940	At5g02050	At3g57600	AT1G16370	AT5G46330
At3g15010	At4g33865	At3g57690	AT1G16850	AT3G24140
At3g15300	At4g13850	At3g58000	AT1G16960	AT2G31880
At3g16050	At4g30800	At3g62230	AT1G17710	AT4G12290
At3g16780	At4g18440	At3g63210	AT1G18050	AT5G57530
At3g21540	At1g17180	At4g00110	AT1G18382	AT4G18050
At3g22230	At3g27080	At4g02890	AT1G19160	AT2G43510
At3g23810	At4g10480	At4g04610	AT1G19390	AT4G02330
At3g23820	At2g14750	At4g08910	AT1G19610	AT4G35070
At3g23830	At1g72170	At4g09020	AT1G19620	AT3G28960
At3g24140	At2g40550	At4g11160	AT1G20310	AT2G42360
At3g25290	At3g53480	At4g14080	AT1G21245	AT1G02930
At3g28200	At5g23290	At4g15440	AT1G21360	AT2G44480
At3g29360	At1g41880	At4g16270	AT1G21510	AT2G43530
At3g49010	At1g64880	At4g17550	AT1G22110	AT2G25510
At3g51680	At2g20360	At4g18280	AT1G22230	AT5G58580
At3g52930	At1g76790	At4g19110	AT1G23170	AT4G23260
At3g57600	At3g01790	At4g19120	AT1G23540	AT5G48000
At3g58010	At2g19720	At4g20320	AT1G23550	AT5G49520
At3g59540	At1g74210	At4g23680	AT1G23660	AT4G08470
At3g62110	At5g56010	At4g25420	AT1G24270	AT1G65690
At3g63160	At5g10010	At4g29980	AT1G25270	AT4G15210
At4g00310	At1g26910	At4g30250	AT1G25310	AT2G32690
At4g00770	At3g20470	At4g30650	AT1G26450	AT4G02940
At4g01480	At1g15385	At4g30660	AT1G27213	AT3G18280
At4g02270	At5g59320	At4g31805	AT1G27490	AT3G05640
At4g02360	At3g53890	At4g32208	AT1G27670	AT2G38300
At4g02500	At5g12110	At4g36870	AT1G27680	AT4G25820
At4g04910	At3g10185	At4g37870	AT1G28500	AT3G16150
At4g15770	At1g18630	At4g37980	AT1G29290	AT2G21080
At4g16720	At2g44160	At4g40020	AT1G30040	AT5G62850
At4g18422	At1g78370	At5g02500	AT1G30135	AT1G59960
At4g25630	At4g25740	At5g06190	AT1G30370	AT5G03350
At4g26010	At3g62990	At5g07230	AT1G30720	AT5G26000
At4g26670	At2g27840	At5g08130	AT1G30730	AT4G17070
At4g26690	At2g35790	At5g09590	AT1G30740	AT3G10040
At4g27950	At3g25730	At5g10140	AT1G30920	AT4G01430
At4g30660	At3g04960	At5g15160	AT1G32350	AT2G26040
At4g32390	At4g32470	At5g15230	AT1G33470	AT1G62980
At4g34490	At1g67500	At5g15960	AT1G34050	AT4G01700
At4g35320	At5g05960	At5g15970	AT1G34410	AT2G24520
At4g38620	At1g61580	At5g18430	AT1G34790	AT1G07720
At4g39050	At4g17970	At5g19580	AT1G35625	AT4G08850
At4g40090	At5g61170	At5g22500	AT1G35910	AT1G21540
At5g01640	At2g27710	At5g26000	AT1G36060	AT1G79770
At5g06265	At2g28420	At5g28300	AT1G36960	AT4G18280
At5g06630	At2g30770	At5g38690	AT1G37150	AT4G34230
At5g07030	At1g73620	At5g39160	AT1G41875	AT3G23840
At5g07180	At5g05580	At5g39190	AT1G42080	AT1G06620
At5g09510	At1g14810	At5g43500	AT1G43000	AT5G40780
At5g09810	At3g18760	At5g44550	AT1G44608	AT5G06760
At5g10020	At5g14030	At5g45880	AT1G45063	AT4G21620
At5g11740	At3g59820	At5g46220	AT1G49000	AT2G14900
At5g14040	At1g13590	At5g46240	AT1G49100	AT3G20470
At5g15490	At1g52000	At5g48570	AT1G49250	AT2G45890
At5g15650	At5g61030	At5g48730	AT1G49715	AT1G77020
At5g20410	At1g16960	At5g52310	AT1G49832	AT2G16630
At5g20790	At1g23020	At5g53870	AT1G50040	AT2G39920
At5g22440	At5g65360	At5g56010	AT1G50470	AT1G01250
At5g22650	At2g23120	At5g56030	AT1G50830	AT4G27730
At5g22740	At5g26000	At5g56860	AT1G51260	AT2G24850
At5g23860	At1g34350	At5g57123	AT1G51410	AT5G02540
At5g24020	At2g39280	At5g57685	AT1G51800	AT5G47880
At5g24090	At5g08020	At5g60890	AT1G52140	AT5G64120
At5g27770	At2g20980	At5g62080	AT1G52855	AT1G62790
At5g37990	At1g03310	At5g62280	AT1G52890	AT5G61520
At5g40590	At5g47930	At5g63350	AT1G52940	AT3G50900
At5g45580	At4g33490	At5g64770	AT1G53030	AT2G23680
At5g46290	At5g40130	At5g65590	AT1G53080	AT2G32190
At5g51570	At5g56000	At5g66400	AT1G53360	AT1G19180
At5g53830	At3g59390	At5g67390	AT1G53470	AT3G03680
At5g55480	At5g48070		AT1G53540	AT5G38030
At5g55730	At4g01240		AT1G53610	AT1G68600
At5g56630	At2g15000		AT1G54230	AT1G51790
At5g60670	At5g09650		AT1G54420	AT1G74790
At5g60980	At5g23740		AT1G55010	AT1G04800
At5g65160	At3g49780		AT1G55660	AT1G14960
At5g66690	At4g13770		AT1G55928	AT5G43330
	At4g28510		AT1G56240	AT1G34510
	At2g33210		AT1G57775	AT4G25260
	At2g21170		AT1G58190	AT2G18660
	At2g15290		AT1G58330	AT5G18470
	At2g34300		AT1G58420	AT3G02550
	At1g51760		AT1G59865	AT4G22470
	At2g15840		AT1G59930	AT1G12320
	At1g08005		AT1G61120	AT2G04570
	At2g43120		AT1G61360	AT5G47980
	At5g47700		AT1G61540	AT2G43520
	At5g24090		AT1G61550	AT4G36670
	At3g44590		AT1G61563	AT2G02990
	At3g12370		AT1G61680	AT3G17130
	At2g43530		AT1G61920	AT3G18250
	At5g43330		AT1G62210	AT4G24130
	At3g06320		AT1G62410	AT5G62080
	At3g13860		AT1G62440	AT5G25440
	At1g06380		AT1G62510	AT1G64170
	At2g39310		AT1G63180	AT1G11580
	At2g46000		AT1G63190	AT2G42610
	At3g44610		AT1G64010	AT5G10380
	At5g57410		AT1G64065	AT4G12550
	At1g54217		AT1G64110	AT4G03010
	At5g10830		AT1G64380	AT1G69230
	At4g23670		AT1G64660	AT1G70710
	At3g44750		AT1G65140	AT2G05440
	At2g44065		AT1G65240	AT2G39030
	At4g36240		AT1G65330	AT4G12470
	At4g02930		AT1G65610	AT2G04160
	At3g02220		AT1G65845	AT1G51800
	At2g47140		AT1G65910	AT1G75040
	At5g03160		AT1G66390	AT3G44860
	At3g22660		AT1G66780	AT2G31940
	At2g27020		AT1G67000	AT4G38810
	At1g19670		AT1G67070	AT2G02850
	At5g01530		AT1G67290	AT1G52890
	At2g43420		AT1G67770	AT1G74210
	At5g24770		AT1G68110	AT1G02220
	At4g31805		AT1G68240	AT4G00680
	At3g16480		AT1G69050	AT1G76190
	At3g25770		AT1G69572	AT4G11890
	At2g33320		AT1G70020	AT1G30870
	At5g09740		AT1G70120	AT1G06640
	At3g16450		AT1G70220	AT1G60630
	At1g56110		AT1G70640	AT2G44450
	At5g60350		AT1G71000	AT2G29350
	At1g30760		AT1G71050	AT1G53060
	At2g27550		AT1G72060	AT4G18290
	At1g52270		AT1G73010	AT5G24210
	At4g38620		AT1G73160	AT3G26320
	At2g15320		AT1G74055	AT5G46240
	At3g18420		AT1G75390	AT5G44130
	At3g53740		AT1G75490	AT2G46070
	At1g52700		AT1G75930	AT1G65500
	At3g10110		AT1G77020	AT5G53550
	At1g58380		AT1G77640	AT1G30720
	At3g20390		AT1G77960	AT1G71050
	At1g16160		AT1G78110	AT3G50340
	At1g66080		AT1G78410	AT4G02280
	At5g06390		AT1G79640	AT2G43570
	At4g26370		AT1G80160	AT4G08950
	At2g38050		AT1G80470	AT2G39200
	At5g28646		AT2G01800	AT2G40260
	At1g34030		AT2G02230	AT4G23210
	At4g22930		AT2G02240	AT1G04110
	At1g11870		AT2G02250	AT4G23600
	At5g48570		AT2G02520	AT2G15080
	At4g12880		AT2G02640	AT3G03640
	At1g20050		AT2G02990	AT5G17760
	At3g52370		AT2G04038	AT4G33050
	At5g58600		AT2G04920	AT5G26260
	At4g11320		AT2G05410	AT5G66400
	At5g60530		AT2G05645	AT5G58670
	At1g79530		AT2G10608	AT5G25840
	At2g06050		AT2G11623	AT2G44460
	At4g31000		AT2G11810	AT4G11650
	At3g50890		AT2G13272	AT5G26340
	At1g56190		AT2G13547	AT1G23200
	At5g45280		AT2G13640	AT5G15120
	At1g62520		AT2G13720	AT4G09420
	At5g56670		AT2G14100	AT3G22840
	At2g46060		AT2G14610	AT4G36430
	At5g20190		AT2G14935	AT5G55050
	At5g25080		AT2G15130	AT4G16260
	At4g21880		AT2G15170	AT3G51430
	At3g05280		AT2G15830	AT4G10955
	At4g36360		AT2G17305	AT2G28870
			AT2G17750	AT3G51450
			AT2G18080	AT3G60420
			AT2G18100	AT5G48540
			AT2G18660	AT4G02270
			AT2G18690	AT1G61800
			AT2G19190	AT5G57050
			AT2G21560	AT2G06050
			AT2G22810	AT3G26830
			AT2G22850	AT3G14210
			AT2G22860	AT3G02240
			AT2G23110	AT2G43535
			AT2G24000	AT5G26220
			AT2G24740	AT3G20300
			AT2G25185	AT1G73805
			AT2G25240	AT2G19460
			AT2G25330	AT3G51760
			AT2G25680	AT1G75880
			AT2G25730	AT2G34810
			AT2G25770	AT4G22753
			AT2G25780	AT3G10280
			AT2G26010	AT1G61120
			AT2G26020	AT4G24480
			AT2G26050	AT1G19380
			AT2G26150	AT2G45290
			AT2G26267	AT5G66460
			AT2G26610	AT1G24530
			AT2G26620	AT1G62400
			AT2G27240	AT3G57600
			AT2G27775	AT3G62680
			AT2G28420	AT1G43910
			AT2G28570	AT3G28930
			AT2G28810	AT3G16030
			AT2G29350	AT4G05390
			AT2G29500	AT5G22740
			AT2G29995	AT2G38870
			AT2G30150	AT1G24260
			AT2G30770	AT3G19930
			AT2G31082	AT1G69880
			AT2G31900	AT1G66920
			AT2G31940	AT2G33380
			AT2G31945	AT4G17970
			AT2G32200	AT4G24340
			AT2G32210	AT3G51860
			AT2G32270	AT5G47550
			AT2G33190	AT5G04960
			AT2G33380	AT4G13345
			AT2G33750	AT4G10270
			AT2G33830	AT4G12500
			AT2G34030	AT3G57240
			AT2G34230	AT5G58570
			AT2G34655	AT1G51890
			AT2G34810	AT5G23840
			AT2G35710	AT1G19610
			AT2G35950	AT5G64570
			AT2G36110	AT2G22970
			AT2G36325	AT5G24090
			AT2G36450	AT5G52750
			AT2G36560	AT5G23020
			AT2G36640	AT5G65870
			AT2G37050	AT1G08810
			AT2G37180	AT2G21880
			AT2G37430	AT2G21590
			AT2G37670	AT3G49620
			AT2G37770	AT3G26170
			AT2G38250	AT4G20050
			AT2G38900	AT3G28540
			AT2G38910	AT4G21680
			AT2G38940	AT1G79530
			AT2G39030	AT5G19580
			AT2G39200	AT3G14620
			AT2G39300	AT4G23140
			AT2G39920	AT5G67400
			AT2G40180	AT4G12430
			AT2G40340	AT1G07390
			AT2G40350	AT4G23810
			AT2G40740	AT3G04720
			AT2G41225	AT3G02480
			AT2G41260	AT5G52810
			AT2G41280	AT5G42860
			AT2G42170	AT4G39210
			AT2G42180	AT3G62820
			AT2G42640	AT3G46280
			AT2G43510	AT1G35710
			AT2G43590	AT5G55450
			AT2G43745	AT2G34930
			AT2G44470	AT2G20875
			AT2G44735	AT1G73260
			AT2G45023	AT4G24510
			AT2G45130	AT5G59320
			AT2G45220	AT1G72910
			AT2G45412	AT1G78530
			AT2G45890	AT5G36220
			AT2G46070	AT4G22212
			AT2G46790	AT5G06870
			AT2G46880	AT1G33960
			AT2G47260	AT3G51660
			AT2G47270	AT2G39690
			AT2G47480	AT2G39210
			AT2G47485	AT1G17230
			AT2G47560	AT4G25810
			AT2G47770	AT2G29120
			AT3G01600	AT4G12480
			AT3G02480	AT5G46050
			AT3G02840	AT4G19680
			AT3G02990	AT3G15350
			AT3G03260	AT5G18430
			AT3G03341	AT2G21140
			AT3G03530	AT4G31800
			AT3G03640	AT4G14365
			AT3G03660	AT1G51850
			AT3G03700	AT5G39160
			AT3G03726	AT1G24470
			AT3G05320	AT5G05500
			AT3G05540	AT1G10060
			AT3G05640	AT2G30500
			AT3G05727	AT4G33950
			AT3G05860	AT5G48485
			AT3G05975	AT2G44570
			AT3G06360	AT5G04950
			AT3G06490	AT4G26830
			AT3G09620	AT5G44420
			AT3G09730	AT3G09940
			AT3G10930	AT3G15720
			AT3G11930	AT4G24040
			AT3G12500	AT5G50200
			AT3G12502	AT5G44820
			AT3G12580	AT5G61160
			AT3G13940	AT5G06530
			AT3G14300	AT2G45220
			AT3G14570	AT2G41230
			AT3G14780	AT5G35190
			AT3G14950	AT4G38420
			AT3G15440	AT1G17420
			AT3G15534	AT5G14920
			AT3G15910	AT2G02930
			AT3G16330	AT4G16563
			AT3G16340	AT2G29940
			AT3G16600	AT2G35760
			AT3G16895	AT1G03440
			AT3G16900	AT3G47480
			AT3G17690	AT4G25110
			AT3G19350	AT4G21830
			AT3G19615	AT2G13570
			AT3G20015	AT4G24140
			AT3G20130	AT4G21850
			AT3G20340	AT3G26210
			AT3G20555	AT1G01900
			AT3G20850	AT3G17070
			AT3G21320	AT4G21840
			AT3G21330	AT4G02520
			AT3G21560	AT5G39190
			AT3G21840	AT5G39130
			AT3G22570	AT1G72930
			AT3G22690	AT4G12432
			AT3G23380	AT4G23160
			AT3G23730	AT1G16300
			AT3G24140	AT3G26180
			AT3G24270	AT4G24350
			AT3G24715	AT3G44870
			AT3G25240	AT1G66910
			AT3G25620	AT2G46720
			AT3G26390	AT4G10960
			AT3G27027	AT5G25980
			AT3G27250	AT1G30730
			AT3G27785	AT2G05510
			AT3G27970	AT2G32210
			AT3G28210	AT1G02920
			AT3G28360	AT4G12280
			AT3G28490	AT2G46440
			AT3G28550	AT4G37520
			AT3G29763	AT4G22592
			AT3G31415	AT3G18000
			AT3G32030	AT1G11460
			AT3G42130
			AT3G42473
			AT3G42990
			AT3G43148
			AT3G43480
			AT3G43950
			AT3G44171
			AT3G44428
			AT3G44510
			AT3G44760
			AT3G45790
			AT3G45810
			AT3G46230
			AT3G46300
			AT3G47030
			AT3G47100
			AT3G47190
			AT3G47543
			AT3G47770
			AT3G48510
			AT3G48640
			AT3G48650
			AT3G48770
			AT3G48850
			AT3G48960
			AT3G49120
			AT3G49480
			AT3G49630
			AT3G49970
			AT3G50130
			AT3G50450
			AT3G51400
			AT3G52072
			AT3G52490
			AT3G52520
			AT3G52748
			AT3G53200
			AT3G53250
			AT3G55370
			AT3G55672
			AT3G55840
			AT3G55970
			AT3G56180
			AT3G56210
			AT3G56620
			AT3G57600
			AT3G57840
			AT3G58000
			AT3G58240
			AT3G58640
			AT3G59030
			AT3G59100
			AT3G59510
			AT3G59880
			AT3G60720
			AT3G61230
			AT3G61410
			AT3G61571
			AT3G61660
			AT3G61990
			AT3G62570
			AT3G62680
			AT3G62690
			AT3G62860
			AT3G63050
			AT4G00770
			AT4G00970
			AT4G01350
			AT4G01440
			AT4G01671
			AT4G01870
			AT4G02280
			AT4G03360
			AT4G03930
			AT4G04315
			AT4G04402
			AT4G04450
			AT4G04745
			AT4G05010
			AT4G05270
			AT4G05497
			AT4G06526
			AT4G06735
			AT4G08485
			AT4G08878
			AT4G09030
			AT4G09100
			AT4G09420
			AT4G09740
			AT4G09775
			AT4G09965
			AT4G10250
			AT4G10310
			AT4G10845
			AT4G10870
			AT4G11000
			AT4G11470
			AT4G11890
			AT4G12050
			AT4G12120
			AT4G12400
			AT4G12490
			AT4G13260
			AT4G13790
			AT4G14370
			AT4G14450
			AT4G14630
			AT4G14746
			AT4G15120
			AT4G15230
			AT4G15660
			AT4G15670
			AT4G15680
			AT4G15690
			AT4G15700
			AT4G16230
			AT4G16790
			AT4G18170
			AT4G18830
			AT4G19680
			AT4G19740
			AT4G19930
			AT4G20810
			AT4G20860
			AT4G20900
			AT4G21010
			AT4G21216
			AT4G21250
			AT4G21730
			AT4G21830
			AT4G22170
			AT4G22233
			AT4G22470
			AT4G22485
			AT4G22505
			AT4G22510
			AT4G22513
			AT4G22517
			AT4G22520
			AT4G22530
			AT4G23070
			AT4G23220
			AT4G23410
			AT4G23420
			AT4G23560
			AT4G23810
			AT4G24000
			AT4G24180
			AT4G24320
			AT4G24480
			AT4G24860
			AT4G25200
			AT4G26488
			AT4G26530
			AT4G26820
			AT4G26890
			AT4G27160
			AT4G27590
			AT4G27670
			AT4G27980
			AT4G28060
			AT4G28330
			AT4G28340
			AT4G28520
			AT4G28580
			AT4G28700
			AT4G28720
			AT4G28790
			AT4G28811
			AT4G29570
			AT4G30050
			AT4G30430
			AT4G31110
			AT4G31870
			AT4G32230
			AT4G32714
			AT4G33300
			AT4G33467
			AT4G33585
			AT4G35070
			AT4G35720
			AT4G36370
			AT4G36510
			AT4G36710
			AT4G36880
			AT4G37340
			AT4G37400
			AT4G37430
			AT4G37730
			AT4G37770
			AT4G37990
			AT4G38500
			AT4G39190
			AT4G39340
			AT4G39360
			AT4G39650
			AT4G39670
			AT4G39700
			AT4G39770
			AT4G39830
			AT4G39930
			AT4G40070
			AT5G01540
			AT5G01600
			AT5G01860
			AT5G02210
			AT5G02460
			AT5G02540
			AT5G02900
			AT5G03310
			AT5G03700
			AT5G03720
			AT5G03960
			AT5G05300
			AT5G05965
			AT5G06470
			AT5G06790
			AT5G06800
			AT5G07060
			AT5G07570
			AT5G08350
			AT5G10278
			AT5G10280
			AT5G10695
			AT5G11412
			AT5G12020
			AT5G12030
			AT5G13150
			AT5G13330
			AT5G13880
			AT5G14990
			AT5G15380
			AT5G16360
			AT5G17180
			AT5G17340
			AT5G17760
			AT5G17810
			AT5G17830
			AT5G17980
			AT5G18000
			AT5G19610
			AT5G21080
			AT5G22470
			AT5G23350
			AT5G23360
			AT5G23370
			AT5G23960
			AT5G23980
			AT5G24250
			AT5G24570
			AT5G24800
			AT5G25910
			AT5G25980
			AT5G26000
			AT5G26050
			AT5G26114
			AT5G26146
			AT5G26300
			AT5G26840
			AT5G27238
			AT5G27940
			AT5G27945
			AT5G28010
			AT5G28310
			AT5G28642
			AT5G28646
			AT5G33355
			AT5G34581
			AT5G35110
			AT5G35375
			AT5G35604
			AT5G35900
			AT5G36920
			AT5G36925
			AT5G37130
			AT5G37440
			AT5G37490
			AT5G37660
			AT5G37900
			AT5G38100
			AT5G38390
			AT5G38450
			AT5G38850
			AT5G38900
			AT5G38930
			AT5G38940
			AT5G39100
			AT5G39110
			AT5G39120
			AT5G39130
			AT5G39160
			AT5G39180
			AT5G39190
			AT5G39490
			AT5G39580
			AT5G39820
			AT5G39880
			AT5G40010
			AT5G40100
			AT5G40382
			AT5G40780
			AT5G40980
			AT5G41300
			AT5G41680
			AT5G41900
			AT5G42010
			AT5G42200
			AT5G42223
			AT5G42680
			AT5G42690
			AT5G42797
			AT5G42900
			AT5G42970
			AT5G43000
			AT5G43020
			AT5G43840
			AT5G43860
			AT5G44050
			AT5G44360
			AT5G44420
			AT5G44430
			AT5G44910
			AT5G45150
			AT5G45580
			AT5G45890
			AT5G46845
			AT5G46877
			AT5G46900
			AT5G47850
			AT5G47920
			AT5G48375
			AT5G48485
			AT5G50345
			AT5G50600
			AT5G50820
			AT5G51440
			AT5G51720
			AT5G51920
			AT5G52660
			AT5G53380
			AT5G53588
			AT5G53592
			AT5G53730
			AT5G53840
			AT5G53870
			AT5G53950
			AT5G53960
			AT5G54095
			AT5G55040
			AT5G55690
			AT5G55800
			AT5G56050
			AT5G56960
			AT5G57530
			AT5G57550
			AT5G58080
			AT5G59370
			AT5G59510
			AT5G59820
			AT5G60220
			AT5G60260
			AT5G60380
			AT5G60630
			AT5G61390
			AT5G61490
			AT5G61605
			AT5G61710
			AT5G61730
			AT5G61740
			AT5G61820
			AT5G62100
			AT5G62820
			AT5G62850
			AT5G63170
			AT5G64110
			AT5G64120
			AT5G64490
			AT5G64510
			AT5G64750
			AT5G65330
			AT5G65590
			AT5G66110
			AT5G66400
			AT5G66440
			ATHB5
			AV547204
			AV784391
			AY464629
			BE039502
			BP589684
			BP600644
			BP667360
			BT010770
			BU917423
			BX818802
			BX834370
			BX836338
			BX837662
			BX837964
			BX839866
			BX841465
			CA781222
			CAD1
			CB185540
			CD531672
			CD532105
			CD532179
			DQ108699
			DR355517
			DR368472
			DR376127
			EF183252
			EG424605
			EG438208
			EG439715
			EG465106
			EG482801
			EG491551
			EG497920
			EG511673
			FRS2
			GMII
			GSTF7
			MIR169G
			NP033841
			NP034659
			NP035776
			NP10636258
			NP162830
			NP180295
			NP190082
			NP206766
			NP207383
			NP207760
			NP214745
			NP221269
			NP221870
			NP222387
			NP226346
			NP226369
			NP226538
			NP226854
			NP227392
			NP230399
			NP235649
			NP236646
			NP281205
			NP305579
			NP306413
			NP306456
			NP306485
			NP306627
			NP339102
			NP453905
			NP454446
			NP454525
			NP454873
			NP456301
			SOT16
			TA27460_3702
			TA28168_3702
			TA29208_3702
			TA30401_3702
			TA31683_3702
			TA32296_3702
			TA34507_3702
			TA34859_3702
			TA35774_3702
			TA36872_3702
			TA38361_3702
			TA41847_3702
			TA42683_3702
			TA44628_3702
			TA45066_3702
			TA46212_3702
			TA46301_3702
			TA48629_3702
			TA49574_3702
			TA49640_3702
			TA51147_3702
			TA52169_3702
			TA52363_3702
			TA52672_3702
			TA53433_3702
			TA53446_3702
			TC358247
			TC362065
			TC365431
			TC371216
			TC372062
			TC374310
			TC375116
			TC375430
			TC376054
			TC382311
			TC384655
			TC387173
			TC388261
			TC390732
			TC394429
			TC395782
			TC396704
			TC396736
			TC398054
			TC400486
			TC406041
			UGT74B1
			UXS1
			ZIP5
			ZPR4
