# Supplementary material for: Co-option and neofunctionalization of stomatal executors for defense against herbivores in Brassicales
Source: Research Square preprint supplement (doi:10.21203/rs.3.rs-3632546/v1), 2023-12-11
Supplement: Supplementary file 11 [file Supplementary_table3_231018.xlsx]

## Sheet: WSB_binding_sites
Region	Gene.symbol	Gene.ID	Gene.chrom	Gene.start	Gene.end	Gene.strand	Gene.distance	Gene.section	iWSB_es24_ChIP
1_14983_15291	NGA3	AT1G01030	1	11649	13714	-	1269	1to5kb	51.1739		3199 locus
1_20715_21424	DCL1	AT1G01040	1	23121	31227	+	1697	1to5kb	112.044		3034 unique
1_1171435_1171703	AT1G04360	AT1G04360	1	1167288	1169034	-	2401	1to5kb	72.7208
1_1942372_1942839	AT1G06360	AT1G06360	1	1938862	1940496	-	1876	1to5kb	74.8755		1to5kb	193
1_2520686_2520997	ACA7	AT1G08080	1	2516991	2518611	-	2075	1to5kb	59.7927		promoter	1921
1_3249344_3250369	LRR XI-23	AT1G09970	1	3252098	3255782	+	1729	1to5kb	166.45		5UTR	114
1_3361822_3362203	GRP23	AT1G10270	1	3363432	3366493	+	1229	1to5kb	63.0247		exon	24
1_3721204_3721676	SUB	AT1G11130	1	3722708	3727450	+	1032	1to5kb	91.0357		intron	44
1_3773672_3773935	STP1	AT1G11260	1	3777236	3780823	+	3301	1to5kb	65.1794		Intronexonboundary	266
1_4167227_4167478	NAC007	AT1G12260	1	4162826	4165928	-	1299	1to5kb	50.6353		3UTR	297
1_4231283_4231576	ACR8	AT1G12420	1	4226239	4229211	-	2072	1to5kb	70.5662		intergenic	340
1_4316221_4316472	AT1G12672	AT1G12672	1	4318309	4319090	+	1837	1to5kb	68.4115		sum	3199
1_4553959_4554263	DOT5	AT1G13290	1	4550153	4551620	-	2339	1to5kb	61.4087
1_5348540_5348916	GA3OX1	AT1G15550	1	5344388	5346342	-	2198	1to5kb	101.809
1_5360443_5360715	CYCA2%3B3	AT1G15570	1	5361865	5365559	+	1150	1to5kb	50.0966
1_6014895_6015398	AT1G17500	AT1G17500	1	6017808	6023503	+	2410	1to5kb	79.1849
1_6103037_6103294	AT1G17744	AT1G17744	1	6100961	6101983	-	1054	1to5kb	45.7872
1_6876336_6876621	AT1G19840	AT1G19840	1	6872275	6873358	-	2978	1to5kb	59.254
1_7312089_7312353	AT1G20970	AT1G20970	1	7313901	7319921	+	1548	1to5kb	60.3314
1_7322336_7322603	SPL14	AT1G20980	1	7324471	7329441	+	1868	1to5kb	51.7126
1_7947491_7947935	ATL15	AT1G22500	1	7949476	7950900	+	1541	1to5kb	71.1048
1_10165765_10166170	AT1G29090	AT1G29090	1	10162795	10164452	-	1313	1to5kb	75.4142
1_10489799_10490200	AT1G29950	AT1G29950	1	10491698	10494598	+	1498	1to5kb	72.7208
1_11211202_11211452	LBD4	AT1G31320	1	11212958	11214567	+	1506	1to5kb	59.7927
1_11472592_11473323	AT1G31940	AT1G31940	1	11470056	11471481	-	1111	1to5kb	133.052
1_11649973_11650281	GulLO1	AT1G32300	1	11651327	11653380	+	1046	1to5kb	62.4861
1_12040573_12040827	AT1G33220	AT1G33220	1	12044872	12045879	+	4045	1to5kb	56.022
1_17630832_17631088	ATE2F2	AT1G47870	1	17634697	17637809	+	3609	1to5kb	43.6325
1_19303260_19303643	IAA18	AT1G51950	1	19305081	19307518	+	1438	1to5kb	94.2678
1_19433030_19433446	AT1G52190	AT1G52190	1	19434480	19439031	+	1034	1to5kb	69.4888
1_20046585_20047016	WAG1	AT1G53700	1	20048434	20050294	+	1418	1to5kb	82.417
1_20096888_20097220	PME2	AT1G53830	1	20098522	20100978	+	1302	1to5kb	64.6408
1_20239804_20240076	ATG12A	AT1G54210	1	20241226	20242641	+	1150	1to5kb	63.0247
1_21444290_21444549	PUP18	AT1G57990	1	21441179	21443036	-	1254	1to5kb	49.5579
1_21449118_21449385	AT1G58007	AT1G58007	1	21445821	21447502	-	1616	1to5kb	48.4806
1_22844449_22844735	AT1G61840	AT1G61840	1	22847247	22849989	+	2512	1to5kb	71.1048
1_22887066_22887374	AT1G61920	AT1G61920	1	22888452	22889037	+	1078	1to5kb	58.7154
1_23097771_23098022	AT1G62421	AT1G62421	1	23099484	23099889	+	1462	1to5kb	71.1048
1_23126589_23126877	AT1G62480	AT1G62480	1	23128651	23129759	+	1774	1to5kb	49.5579
1_23908317_23908651	GH9C2	AT1G64390	1	23911024	23915236	+	2373	1to5kb	78.6463
1_23909648_23909932	GH9C2	AT1G64390	1	23911024	23915236	+	1092	1to5kb	64.1021
1_24326718_24327038	FAS1	AT1G65470	1	24319396	24324091	-	2627	1to5kb	54.9446
1_25689944_25690215	AT1G68490	AT1G68490	1	25693449	25696250	+	3234	1to5kb	58.7154
1_25699657_25699967	AT1G68500	AT1G68500	1	25701770	25702778	+	1803	1to5kb	73.7982
1_26241989_26242252	AT1G69760	AT1G69760	1	26239260	26240843	-	1146	1to5kb	67.8728
1_26372236_26372580	AT1G70020	AT1G70020	1	26377370	26378359	+	4790	1to5kb	61.9474
1_26373276_26373595	AT1G70020	AT1G70020	1	26377370	26378359	+	3775	1to5kb	56.022
1_26475915_26476375	TPS8	AT1G70290	1	26470795	26474833	-	1082	1to5kb	88.3424
1_26777197_26777476	FAB1C	AT1G71010	1	26782048	26788973	+	4572	1to5kb	59.7927
1_26961774_26962036	AT1G71695	AT1G71695	1	26964087	26966688	+	2051	1to5kb	63.5634
1_27161187_27161457	AT1G72180	AT1G72180	1	27162820	27167430	+	1363	1to5kb	58.1767
1_27223005_27223344	PSY1R	AT1G72300	1	27217368	27221265	-	1740	1to5kb	81.8783
1_27301239_27301612	AT1G72510	AT1G72510	1	27303323	27304927	+	1711	1to5kb	89.4197
1_27363731_27364084	AT1G72700	AT1G72700	1	27365772	27371784	+	1688	1to5kb	80.8009
1_27657986_27658400	PIN1	AT1G73590	1	27659673	27663253	+	1273	1to5kb	80.8009
1_27711546_27711879	CDKD1%3B1	AT1G73690	1	27714910	27717420	+	3031	1to5kb	74.8755
1_28355533_28355801	SRS5	AT1G75520	1	28351522	28353549	-	1984	1to5kb	54.9446
1_28929781_28930037	ACR3	AT1G76990	1	28932119	28936371	+	2082	1to5kb	61.9474
1_29384753_29385332	AUF1	AT1G78100	1	29387672	29389222	+	2340	1to5kb	105.58
1_29385752_29386077	AUF1	AT1G78100	1	29387672	29389222	+	1595	1to5kb	81.3396
1_29441889_29442138	AT1G78260	AT1G78260	1	29446861	29450515	+	4723	1to5kb	71.1048
2_1382385_1382638	AT2G04115	AT2G04115	2	1385438	1386071	+	2800	1to5kb	48.4806
2_1731763_1732028	AT2G04925	AT2G04925	2	1729666	1730190	-	1573	1to5kb	48.4806
2_2291460_2291742	RIPK	AT2G05940	2	2287238	2289636	-	1824	1to5kb	54.9446
2_3396928_3397234	AT2G07642	AT2G07642	2	3400797	3400838	+	3563	1to5kb	144.903
2_7579538_7579809	RHA3A	AT2G17450	2	7576388	7577846	-	1692	1to5kb	59.254
2_7580214_7580600	RHA3A	AT2G17450	2	7576388	7577846	-	2368	1to5kb	71.6435
2_7603223_7603567	AT2G17500	AT2G17500	2	7606728	7609278	+	3161	1to5kb	63.0247
2_7721048_7721367	BZIP27	AT2G17770	2	7722825	7724323	+	1458	1to5kb	57.0993
2_7862731_7862991	AT2G18090	AT2G18090	2	7864175	7867820	+	1184	1to5kb	52.7899
2_8106280_8106717	TPS11	AT2G18700	2	8108898	8112010	+	2181	1to5kb	80.8009
2_8219696_8220092	HA1	AT2G18960	2	8221514	8227622	+	1422	1to5kb	91.0357
2_8331641_8331984	FRK1	AT2G19190	2	8326049	8329944	-	1697	1to5kb	65.7181
2_8332360_8332621	FRK1	AT2G19190	2	8326049	8329944	-	2416	1to5kb	52.2513
2_8543512_8543780	AT2G19802	AT2G19802	2	8538776	8539217	-	4295	1to5kb	44.1712
2_8753364_8753700	XIG	AT2G20290	2	8742885	8752315	-	1049	1to5kb	61.4087
2_9709835_9710130	AT2G22805	AT2G22805	2	9712264	9713135	+	2134	1to5kb	56.022
2_9933864_9934166	DEAR3	AT2G23340	2	9937792	9938997	+	3626	1to5kb	43.6325
2_10307929_10308236	AT2G24240	AT2G24240	2	10310482	10312573	+	2246	1to5kb	68.4115
2_10706354_10706730	AT2G25150	AT2G25150	2	10702341	10704825	-	1529	1to5kb	61.4087
2_11163127_11163409	AT2G26230	AT2G26230	2	11164575	11167346	+	1166	1to5kb	49.0192
2_11176304_11176594	3BETAHSD/D2	AT2G26260	2	11178064	11183278	+	1470	1to5kb	56.5607
2_11363450_11363808	AT2G26695	AT2G26695	2	11364996	11366030	+	1188	1to5kb	83.4943
2_12788520_12788809	FAD3	AT2G29980	2	12781524	12785190	-	3330	1to5kb	71.1048
2_12819595_12819900	MAPKKK14	AT2G30040	2	12821569	12823169	+	1669	1to5kb	69.4888
2_13312046_13312328	ERF15	AT2G31230	2	13306431	13307572	-	4474	1to5kb	85.1103
2_14780584_14780866	KUP11	AT2G35060	2	14775041	14779106	-	1478	1to5kb	52.7899
2_15099176_15099736	EDA12	AT2G35950	2	15104716	15106119	+	4980	1to5kb	133.052
2_15276327_15276759	AT2G36410	AT2G36410	2	15278517	15280726	+	1758	1to5kb	108.812
2_15333717_15334018	AT2G36570	AT2G36570	2	15335284	15337995	+	1266	1to5kb	70.5662
2_15375023_15375539	AT2G36680	AT2G36680	2	15368792	15371033	-	3990	1to5kb	105.58
2_15377264_15377630	AT2G36690	AT2G36690	2	15379660	15382131	+	2030	1to5kb	89.9584
2_15512657_15512918	AT2G36930	AT2G36930	2	15509898	15511607	-	1050	1to5kb	60.3314
2_15616192_15616555	RD28	AT2G37180	2	15617635	15619155	+	1080	1to5kb	80.2623
2_16361795_16362089	MLO12	AT2G39200	2	16356041	16359943	-	1852	1to5kb	83.4943
2_16759457_16759732	AT2G40120	AT2G40120	2	16754891	16757599	-	1858	1to5kb	60.3314
2_17003702_17004093	WRKY54	AT2G40750	2	17000419	17002528	-	1174	1to5kb	75.9529
2_17163728_17164144	SIB2	AT2G41180	2	17165191	17166110	+	1047	1to5kb	96.4225
2_17906925_17907278	IBH1	AT2G43060	2	17909007	17910210	+	1729	1to5kb	58.1767
2_18650942_18651221	AT2G45220	AT2G45220	2	18644061	18646606	-	4336	1to5kb	60.3314
2_19216268_19216543	GulLO6	AT2G46760	2	19212881	19215210	-	1058	1to5kb	74.8755
2_19408868_19409391	WRKY23	AT2G47260	2	19404802	19407098	-	1770	1to5kb	119.585
3_905200_905769	AT3G03680	AT3G03680	3	907384	910928	+	1615	1to5kb	99.6545
3_2352674_2352947	PUB9	AT3G07360	3	2354640	2356884	+	1693	1to5kb	67.3341
3_3404117_3404661	AT3G10880	AT3G10880	3	3405800	3407921	+	1139	1to5kb	92.6517
3_3691604_3692002	AT3G11680	AT3G11680	3	3686773	3689405	-	2199	1to5kb	86.1877
3_4313216_4313471	CAX2	AT3G13320	3	4314505	4318487	+	1034	1to5kb	70.5662
3_4439390_4439834	AT3G13590	AT3G13590	3	4435316	4437334	-	2056	1to5kb	79.1849
3_4483707_4484118	AT3G13690	AT3G13690	3	4485623	4490420	+	1505	1to5kb	77.5689
3_4723962_4724574	AT3G14205	AT3G14205	3	4715650	4721003	-	2959	1to5kb	128.743
3_4725414_4725917	ESM1	AT3G14210	3	4729399	4731847	+	3482	1to5kb	117.969
3_4932124_4933017	CYP72A14	AT3G14680	3	4934330	4936644	+	1313	1to5kb	150.828
3_6379999_6380453	AT3G18535	AT3G18535	3	6375269	6377625	-	2374	1to5kb	68.4115
3_6381309_6381628	BRC1	AT3G18550	3	6383289	6385815	+	1661	1to5kb	61.9474
3_6493523_6493789	PMT5	AT3G18830	3	6488843	6491429	-	2094	1to5kb	57.0993
3_7397254_7397694	AT3G21100	AT3G21100	3	7398959	7402525	+	1265	1to5kb	82.9556
3_7711687_7712139	BBX31	AT3G21890	3	7708833	7709933	-	1754	1to5kb	70.5662
3_7911009_7911610	TIC	AT3G22380	3	7912905	7919707	+	1295	1to5kb	133.052
3_8218485_8218738	AT3G23090	AT3G23090	3	8214289	8217206	-	1279	1to5kb	46.8645
3_9807038_9807823	NUDX13	AT3G26690	3	9804253	9805781	-	1257	1to5kb	151.906
3_15991350_15991697	NIT3	AT3G44320	3	15993259	15995811	+	1562	1to5kb	74.8755
3_17507480_17507957	CDF3	AT3G47500	3	17503883	17506124	-	1356	1to5kb	98.5771
3_18069029_18069336	CDC2	AT3G48750	3	18071454	18074641	+	2118	1to5kb	89.9584
3_18751977_18752259	CRK	AT3G50530	3	18753337	18757145	+	1078	1to5kb	63.0247
3_19936979_19937356	AT3G53820	AT3G53820	3	19938564	19939231	+	1208	1to5kb	87.8037
3_21678653_21678906	TTL4	AT3G58620	3	21680027	21683280	+	1121	1to5kb	55.4833
3_21871122_21871438	AT3G59150	AT3G59150	3	21872831	21874422	+	1393	1to5kb	54.406
3_22323799_22324301	HAT3	AT3G60390	3	22320580	22322661	-	1138	1to5kb	86.7263
3_22363761_22364159	AT3G60520	AT3G60520	3	22361431	22362579	-	1182	1to5kb	93.1904
3_22993405_22993744	IAA30	AT3G62100	3	22995686	22996809	+	1942	1to5kb	81.8783
4_727509_727814	PPOX	AT4G01690	4	729863	732433	+	2049	1to5kb	64.1021
4_2415480_2415750	AT4G04745	AT4G04745	4	2412618	2413447	-	2033	1to5kb	50.6353
4_2658772_2659084	AT4G05150	AT4G05150	4	2660156	2662908	+	1072	1to5kb	54.9446
4_5495496_5495841	SULTR1%3B1	AT4G08620	4	5500313	5506313	+	4472	1to5kb	68.4115
4_7355728_7356104	SKU5	AT4G12420	4	7349187	7353135	-	2593	1to5kb	68.4115
4_7403323_7403580	AZI1	AT4G12470	4	7401087	7401951	-	1372	1to5kb	57.638
4_8786521_8786825	CYP705A4	AT4G15380	4	8788659	8790589	+	1834	1to5kb	50.0966
4_9836512_9837106	AT4G17670	AT4G17670	4	9833491	9834859	-	1653	1to5kb	93.7291
4_12475427_12475708	NLP7	AT4G24020	4	12479528	12484049	+	3820	1to5kb	70.0275
4_12476023_12476410	NLP7	AT4G24020	4	12479528	12484049	+	3118	1to5kb	81.3396
4_13652162_13652512	WES1	AT4G27260	4	13653579	13656285	+	1067	1to5kb	87.8037
4_14376336_14376685	IQD25	AT4G29150	4	14378706	14380512	+	2021	1to5kb	87.265
4_14794156_14794405	ATR2	AT4G30210	4	14796695	14800961	+	2290	1to5kb	64.6408
4_15198601_15199076	AT4G31330	AT4G31330	4	15202288	15203562	+	3212	1to5kb	69.4888
4_15381353_15381712	WRKY18	AT4G31800	4	15382777	15385100	+	1065	1to5kb	80.2623
4_15817695_15817955	AT4G32800	AT4G32800	4	15819489	15820879	+	1534	1to5kb	58.1767
4_16054007_16054284	AT4G33310	AT4G33310	4	16056156	16056416	+	1872	1to5kb	49.5579
4_16587816_16588645	AT4G34770	AT4G34770	4	16591179	16591910	+	2534	1to5kb	151.367
4_16645964_16646353	AT4G34950	AT4G34950	4	16642142	16644928	-	1036	1to5kb	67.8728
4_17319265_17319746	HB40	AT4G36740	4	17314453	17316441	-	2824	1to5kb	95.3451
4_17470376_17470630	AT4G37080	AT4G37080	4	17472980	17476979	+	2350	1to5kb	55.4833
4_18207904_18208308	VHA-A3	AT4G39080	4	18209399	18215204	+	1091	1to5kb	93.7291
4_18321382_18322297	BRI1	AT4G39400	4	18324457	18328831	+	2160	1to5kb	158.37
4_18391983_18392283	AT4G39600	AT4G39600	4	18388890	18390797	-	1186	1to5kb	53.3286
4_18453638_18453889	TPPH	AT4G39770	4	18448865	18451305	-	2333	1to5kb	57.638
5_346567_346827	AT5G01890	AT5G01890	5	341376	345457	-	1110	1to5kb	52.7899
5_968774_969375	AT5G03700	AT5G03700	5	965562	967432	-	1342	1to5kb	130.898
5_1116837_1117163	GYRB3	AT5G04110	5	1110342	1115007	-	1830	1to5kb	85.1103
5_1376031_1376351	AT5G04760	AT5G04760	5	1373530	1374787	-	1244	1to5kb	99.1158
5_2614371_2614930	AT5G08139	AT5G08139	5	2616134	2617951	+	1204	1to5kb	92.1131
5_3029723_3030126	AT5G09760	AT5G09760	5	3032019	3034578	+	1893	1to5kb	72.7208
5_4201544_4201805	AT5G13181	AT5G13181	5	4198752	4199513	-	2031	1to5kb	66.7954
5_5287903_5288174	CSLA11	AT5G16190	5	5283447	5286842	-	1061	1to5kb	64.6408
5_6188721_6188973	AT5G18610	AT5G18610	5	6192327	6195753	+	3354	1to5kb	61.9474
5_6190305_6190554	AT5G18610	AT5G18610	5	6192327	6195753	+	1773	1to5kb	69.4888
5_6365609_6365884	IPT5	AT5G19040	5	6361776	6363713	-	1896	1to5kb	59.254
5_8445704_8445962	EMB2820	AT5G24670	5	8447378	8451569	+	1416	1to5kb	46.3259
5_10356682_10357101	AT5G28410	AT5G28410	5	10358184	10359438	+	1083	1to5kb	81.3396
5_14551953_14552348	AT5G36907	AT5G36907	5	14550119	14550859	-	1094	1to5kb	73.2595
5_15032662_15032921	RSL1	AT5G37800	5	15036066	15037884	+	3145	1to5kb	44.7099
5_16388675_16388936	AT5G40900	AT5G40900	5	16391836	16393427	+	2900	1to5kb	49.0192
5_17576146_17576442	AT5G43745	AT5G43745	5	17569147	17575051	-	1095	1to5kb	47.4032
5_19413842_19414225	AT5G47940	AT5G47940	5	19409242	19412077	-	1765	1to5kb	63.0247
5_21304714_21305433	SCL8	AT5G52510	5	21307016	21309341	+	1583	1to5kb	137.362
5_21441435_21441811	AT5G52882	AT5G52882	5	21433859	21439133	-	2302	1to5kb	101.271
5_21622111_21622412	CRF3	AT5G53290	5	21617714	21619281	-	2830	1to5kb	50.6353
5_21665753_21666080	AT5G53410	AT5G53410	5	21667939	21668046	+	1859	1to5kb	70.5662
5_22134763_22135028	DFL1	AT5G54510	5	22130964	22133688	-	1075	1to5kb	49.0192
5_22258475_22258781	GPT1	AT5G54800	5	22261134	22263936	+	2353	1to5kb	52.7899
5_22633120_22633443	AT5G55900	AT5G55900	5	22637510	22639828	+	4067	1to5kb	66.7954
5_22643499_22643809	D6PK	AT5G55910	5	22639813	22642414	-	1085	1to5kb	61.4087
5_24084729_24085070	MYB59	AT5G59780	5	24081868	24083562	-	1167	1to5kb	70.5662
5_24384157_24384920	AT5G60680	AT5G60680	5	24386010	24387304	+	1090	1to5kb	152.983
5_25176748_25177107	TUB2	AT5G62690	5	25181296	25183811	+	4189	1to5kb	76.4916
5_25889960_25890261	ABR1	AT5G64750	5	25891449	25893888	+	1188	1to5kb	70.5662
5_26251134_26251409	IAA9	AT5G65670	5	26253408	26256544	+	1999	1to5kb	67.3341
5_26687183_26687552	AT5G66820	AT5G66820	5	26688943	26691180	+	1391	1to5kb	99.6545
5_26851385_26851751	AT5G67290	AT5G67290	5	26848127	26850040	-	1345	1to5kb	89.4197
Mt_3390_3663	None	ATMG00010	Mt	273	734	-	2656	1to5kb	468.645
Mt_4064_4378	None	ATMG00010	Mt	273	734	-	3330	1to5kb	502.043
Mt_10311_10621	None	ATMG00030	Mt	11918	12241	+	1297	1to5kb	547.83
Mt_343625_345360	None	ATMG01350	Mt	346757	347194	+	1397	1to5kb	1866.5
Mt_352873_353360	cox1	ATMG01360	Mt	349830	351413	-	1460	1to5kb	774.612
1_298111_298501	AT1G01830	AT1G01830	1	298451	302310	-	3809	3UTR	84.033
1_324914_325452	AT1G01940	AT1G01940	1	322886	324917	+	2028	3UTR	93.1904
1_658550_658861	GSTF7	AT1G02920	1	658578	659980	-	1119	3UTR	87.265
1_853829_854334	AT1G03440	AT1G03440	1	852151	854297	+	1678	3UTR	81.3396
1_868636_868934	LIN2	AT1G03475	1	868853	871308	-	2374	3UTR	64.6408
1_993037_993301	ABCI18	AT1G03900	1	991106	993126	+	1931	3UTR	51.1739
1_1148357_1148737	AT1G04300	AT1G04300	1	1148564	1154667	-	5930	3UTR	72.1822
1_1167127_1167530	AT1G04350	AT1G04350	1	1164910	1167135	+	2217	3UTR	94.2678
1_1418226_1418636	AT1G04990	AT1G04990	1	1418612	1421863	-	3227	3UTR	107.196
1_2052279_2052538	AT1G06700	AT1G06700	1	2052370	2055548	-	3010	3UTR	61.4087
1_2111332_2111694	AT1G06890	AT1G06890	1	2111323	2114686	-	2992	3UTR	81.3396
1_2160706_2160958	AT1G07040	AT1G07040	1	2160919	2163387	-	2429	3UTR	52.7899
1_2280870_2281144	HAI2	AT1G07430	1	2280746	2282828	-	1684	3UTR	67.8728
1_2498407_2498801	AT1G08050	AT1G08050	1	2498794	2501581	-	2780	3UTR	62.4861
1_2649438_2649834	AT1G08410	AT1G08410	1	2646144	2649440	+	3294	3UTR	66.2568
1_3117788_3118176	RAB11c	AT1G09630	1	3118155	3119815	-	1639	3UTR	74.3369
1_3236582_3237026	HEMA2	AT1G09940	1	3236908	3239554	-	2528	3UTR	82.417
1_3256005_3256530	AT1G09980	AT1G09980	1	3256189	3261741	-	5211	3UTR	91.0357
1_3333375_3333807	NFXL1	AT1G10170	1	3333504	3338188	-	4381	3UTR	91.0357
1_3919661_3919917	AT1G11655	AT1G11655	1	3919237	3919869	+	424	3UTR	49.0192
1_4150974_4151227	AT1G12230	AT1G12230	1	4147962	4151056	+	3012	3UTR	57.0993
1_4233512_4234013	ARK3	AT1G12430	1	4233717	4238795	-	4782	3UTR	92.6517
1_4367015_4367382	AT1G12805	AT1G12805	1	4366577	4367136	+	438	3UTR	73.2595
1_4425512_4425850	PIRL3	AT1G12970	1	4423540	4425936	+	1972	3UTR	82.417
1_4837484_4837950	UCP3	AT1G14140	1	4837927	4839633	-	1683	3UTR	86.7263
1_4945992_4946293	AT1G14450	AT1G14450	1	4946192	4947670	-	1377	3UTR	87.265
1_5151137_5151744	GAI	AT1G14920	1	5148982	5151415	+	2155	3UTR	126.588
1_5369830_5370116	AT1G15600	AT1G15600	1	5368923	5370344	+	907	3UTR	47.9419
1_5405560_5405858	AT1G15710	AT1G15710	1	5404130	5405910	+	1430	3UTR	62.4861
1_5429972_5430422	NRB4	AT1G15780	1	5430040	5436618	-	6196	3UTR	75.9529
1_5469094_5469525	FDM1	AT1G15910	1	5465251	5469180	+	3843	3UTR	74.8755
1_5954809_5955233	JAZ5	AT1G17380	1	5955155	5957511	-	2278	3UTR	80.8009
1_6063288_6063667	AT1G17620	AT1G17620	1	6061895	6063362	+	1393	3UTR	53.3286
1_6093218_6093612	ATB BETA	AT1G17720	1	6093185	6098443	-	4831	3UTR	66.7954
1_6298247_6298585	AT1G18290	AT1G18290	1	6297219	6298328	+	1028	3UTR	63.5634
1_6452997_6453257	MYB47	AT1G18710	1	6450585	6453263	+	2412	3UTR	74.8755
1_6626740_6627038	AT1G19210	AT1G19210	1	6626794	6627688	-	650	3UTR	63.5634
1_6799593_6800045	AT1G19660	AT1G19660	1	6799969	6802906	-	2861	3UTR	103.425
1_7398586_7398894	IGMT4	AT1G21130	1	7398814	7400736	-	1842	3UTR	58.7154
1_7847584_7847878	AUF2	AT1G22220	1	7846459	7847836	+	1125	3UTR	58.1767
1_7993876_7994178	ATSAC1	AT1G22620	1	7994166	8002989	-	8811	3UTR	79.7236
1_8103167_8103738	AT1G22900	AT1G22900	1	8103612	8104605	-	867	3UTR	102.348
1_8127104_8127514	AT1G22960	AT1G22960	1	8127442	8130456	-	2942	3UTR	85.649
1_9448691_9449450	AT1G27200	AT1G27200	1	9449338	9451768	-	2318	3UTR	174.53
1_9667457_9667710	AT1G27752	AT1G27752	1	9662021	9667550	+	5436	3UTR	43.6325
1_10289834_10290321	ML5	AT1G29400	1	10289998	10294630	-	4309	3UTR	132.514
1_11874350_11874855	CID11	AT1G32790	1	11874508	11877549	-	2694	3UTR	79.7236
1_12473577_12473932	EPF2	AT1G34245	1	12472868	12473974	+	709	3UTR	77.5689
1_12935772_12936049	AT1G35255	AT1G35255	1	12935647	12936586	-	537	3UTR	48.4806
1_17013189_17013684	AT1G45010	AT1G45010	1	17013385	17015520	-	1836	3UTR	78.6463
1_17168768_17169526	AT1G45230	AT1G45230	1	17169436	17171472	-	1946	3UTR	107.735
1_17688605_17688986	AT1G47970	AT1G47970	1	17686990	17688859	+	1615	3UTR	85.1103
1_18344436_18344827	AT1G49560	AT1G49560	1	18342451	18344452	+	1985	3UTR	65.7181
1_18356643_18356939	AT1G49590	AT1G49590	1	18354744	18356733	+	1899	3UTR	53.3286
1_18365505_18365818	ICK5	AT1G49620	1	18365336	18366744	-	926	3UTR	57.0993
1_18627375_18627682	AT1G50290	AT1G50290	1	18627551	18628452	-	770	3UTR	70.0275
1_19256989_19257461	AT1G51860	AT1G51860	1	19257403	19261794	-	4333	3UTR	105.58
1_19821248_19821616	ERF8	AT1G53170	1	19821337	19822399	-	783	3UTR	96.9611
1_19912559_19913296	AT1G53380	AT1G53380	1	19912990	19916686	-	3390	3UTR	115.815
1_20309199_20309724	AT1G54410	AT1G54410	1	20309473	20310850	-	1126	3UTR	77.0302
1_20597816_20598126	AT1G55210	AT1G55210	1	20597734	20598768	-	642	3UTR	67.3341
1_21044602_21044895	AT1G56220	AT1G56220	1	21042951	21044998	+	1651	3UTR	61.4087
1_22400624_22400903	AGD2	AT1G60860	1	22400857	22407824	-	6921	3UTR	47.4032
1_22593421_22593757	AT1G61260	AT1G61260	1	22593465	22595338	-	1581	3UTR	81.8783
1_22867736_22868088	AT1G61890	AT1G61890	1	22867689	22871358	-	3270	3UTR	60.3314
1_22994504_22995251	AT1G62250	AT1G62250	1	22994538	22997709	-	2458	3UTR	114.199
1_23172128_23172931	FMO GS-OX4	AT1G62570	1	23168767	23172175	+	3361	3UTR	116.353
1_23689678_23690076	AT1G63840	AT1G63840	1	23689603	23690807	-	731	3UTR	92.6517
1_25621404_25621710	AT1G68360	AT1G68360	1	25621533	25622593	-	883	3UTR	59.7927
1_25659467_25659751	AT1G68440	AT1G68440	1	25657757	25659484	+	1710	3UTR	81.3396
1_25695239_25696080	AT1G68490	AT1G68490	1	25693449	25696250	+	1790	3UTR	156.754
1_26001403_26001822	AT1G69160	AT1G69160	1	25999837	26001614	+	1566	3UTR	84.033
1_26260395_26260755	ATHB13	AT1G69780	1	26258788	26260781	+	1607	3UTR	78.6463
1_26394048_26394504	AT1G70080	AT1G70080	1	26394492	26397603	-	3099	3UTR	92.1131
1_26470641_26471220	TPS8	AT1G70290	1	26470795	26474833	-	3613	3UTR	107.735
1_26512221_26512683	PG2	AT1G70370	1	26512681	26515255	-	2572	3UTR	77.0302
1_27060624_27060959	SUC5	AT1G71890	1	27058381	27060786	+	2243	3UTR	68.4115
1_27118974_27119356	AT1G72060	AT1G72060	1	27118177	27119011	+	797	3UTR	69.4888
1_27619073_27619403	AT1G73450	AT1G73450	1	27613420	27619095	+	5653	3UTR	66.2568
1_28164495_28164810	AT1G75000	AT1G75000	1	28163344	28164814	+	1151	3UTR	56.5607
1_28193913_28194201	RRA2	AT1G75110	1	28194005	28196033	-	1832	3UTR	52.2513
1_28698553_28699204	HMG1	AT1G76490	1	28695760	28698852	+	2793	3UTR	94.2678
1_29270598_29270889	AT1G77840	AT1G77840	1	29268336	29270700	+	2262	3UTR	68.9501
1_29336402_29336908	AT1G78010	AT1G78010	1	29333412	29336484	+	2990	3UTR	106.119
1_29526242_29526682	AT1G78476	AT1G78476	1	29523982	29526284	+	2260	3UTR	105.58
1_29598652_29598917	At1g78690p	AT1G78690	1	29596478	29598662	+	2174	3UTR	55.4833
1_29724523_29724874	AT1G79010	AT1G79010	1	29724796	29727028	-	2154	3UTR	70.5662
1_29809674_29810163	AGC1.7	AT1G79250	1	29810134	29812683	-	2520	3UTR	92.1131
1_29844298_29844694	MC4	AT1G79340	1	29842587	29844638	+	1711	3UTR	78.1076
1_30027556_30027826	GC5	AT1G79830	1	30027569	30033907	-	6081	3UTR	47.9419
1_30097301_30097629	AT1G80000	AT1G80000	1	30092807	30097323	+	4494	3UTR	85.1103
1_30104566_30105286	AT1G80030	AT1G80030	1	30104830	30109087	-	3801	3UTR	93.7291
1_30134860_30135212	HP6	AT1G80100	1	30133718	30134937	+	1142	3UTR	65.1794
1_30139913_30140194	AT1G80120	AT1G80120	1	30138818	30140360	+	1095	3UTR	53.8673
2_188969_189220	HB17	AT2G01430	2	187608	190369	-	1149	3UTR	42.0165
2_387321_387599	EXGT-A3	AT2G01850	2	385171	387478	+	2150	3UTR	54.406
2_469148_469484	GAD3	AT2G02000	2	469370	472070	-	2586	3UTR	73.7982
2_2287090_2287393	RIPK	AT2G05940	2	2287238	2289636	-	2243	3UTR	53.3286
2_3412559_3412935	AT2G07715	AT2G07715	2	3410597	3413161	+	1962	3UTR	204.157
2_6947866_6948151	AT2G15960	AT2G15960	2	6947096	6947866	+	770	3UTR	59.7927
2_7245527_7246106	ADF5	AT2G16700	2	7244500	7246069	+	1027	3UTR	90.4971
2_8911700_8912108	AT2G20670	AT2G20670	2	8911860	8913747	-	1639	3UTR	77.0302
2_9363042_9363485	RKP	AT2G22010	2	9363109	9369461	-	5976	3UTR	73.7982
2_9553812_9554061	CYCD2%3B1	AT2G22490	2	9553797	9556167	-	2106	3UTR	59.254
2_10847283_10847691	EBF1	AT2G25490	2	10847375	10850797	-	3106	3UTR	120.124
2_11005565_11005849	AT2G25800	AT2G25800	2	11005775	11009861	-	4012	3UTR	60.3314
2_11042863_11043138	ATCTH	AT2G25900	2	11041331	11043256	+	1532	3UTR	56.022
2_11567000_11567527	AT2G27080	AT2G27080	2	11563933	11567504	+	3067	3UTR	103.425
2_11683563_11683846	AT2G27310	AT2G27310	2	11683772	11685342	-	1496	3UTR	60.3314
2_11832811_11833070	AT2G27770	AT2G27770	2	11832543	11834427	-	1357	3UTR	59.254
2_11960385_11960761	AT2G28080	AT2G28080	2	11960571	11963440	-	2679	3UTR	70.0275
2_12897563_12897812	AT2G30230	AT2G30230	2	12897054	12898172	+	509	3UTR	51.7126
2_12908923_12909611	RDM4	AT2G30280	2	12909551	12912416	-	2805	3UTR	177.223
2_13306324_13306649	ERF15	AT2G31230	2	13306431	13307572	-	923	3UTR	88.3424
2_13560505_13560778	XIF	AT2G31900	2	13560370	13570469	-	9691	3UTR	54.9446
2_13641869_13642252	PUR ALPHA-1	AT2G32080	2	13642237	13644421	-	2169	3UTR	84.033
2_14851841_14852239	AT2G35260	AT2G35260	2	14849357	14852045	+	2484	3UTR	66.7954
2_15072542_15072976	AT2G35910	AT2G35910	2	15072887	15074140	-	1164	3UTR	86.1877
2_15337865_15338134	AT2G36570	AT2G36570	2	15335284	15337995	+	2581	3UTR	50.0966
2_15673304_15673637	ABCG2	AT2G37360	2	15673410	15675920	-	2283	3UTR	58.1767
2_15831117_15831396	AT2G37750	AT2G37750	2	15830870	15831592	+	247	3UTR	56.5607
2_16570599_16570860	AT2G39725	AT2G39725	2	16569430	16570748	+	1169	3UTR	63.5634
2_16869048_16869466	AT2G40390	AT2G40390	2	16867293	16869104	+	1755	3UTR	77.0302
2_17261581_17262242	AT2G41410	AT2G41410	2	17261728	17263017	-	775	3UTR	103.425
2_17639920_17640208	AT2G42350	AT2G42350	2	17639001	17640300	+	919	3UTR	61.4087
2_17855424_17855898	AT2G42900	AT2G42900	2	17854557	17855511	+	867	3UTR	97.4998
2_17868069_17868367	AT2G42960	AT2G42960	2	17868150	17871599	-	3232	3UTR	59.254
2_17996512_17996842	AT2G43320	AT2G43320	2	17996650	18000027	-	3185	3UTR	65.7181
2_18230622_18230916	AT2G44070	AT2G44070	2	18230865	18232630	-	1714	3UTR	77.0302
2_18261518_18262056	ASHH3	AT2G44150	2	18258569	18261542	+	2949	3UTR	81.3396
2_18672131_18672439	RAD51C	AT2G45280	2	18670009	18672469	+	2122	3UTR	66.2568
2_18806816_18807520	AGL20	AT2G45660	2	18807505	18811125	-	3605	3UTR	103.964
2_18814381_18814883	AT2G45670	AT2G45670	2	18814660	18818545	-	3662	3UTR	86.1877
2_19212326_19212940	GulLO6	AT2G46760	2	19212881	19215210	-	2270	3UTR	104.503
2_19319314_19319698	AT2G47020	AT2G47020	2	19319685	19322507	-	2809	3UTR	85.1103
2_19418286_19418581	AT2G47280	AT2G47280	2	19416775	19418383	+	1511	3UTR	53.8673
2_19498070_19498361	AT2G47500	AT2G47500	2	19492867	19498189	+	5203	3UTR	59.7927
2_19502199_19502554	FUM1	AT2G47510	2	19498229	19502488	+	3970	3UTR	62.4861
3_30706_31333	KIN10	AT3G01090	3	31145	34670	-	3337	3UTR	93.1904
3_508240_508510	AT3G02460	AT3G02460	3	505434	508723	+	2806	3UTR	57.0993
3_511526_511848	SAMDC	AT3G02470	3	508886	511561	+	2640	3UTR	65.1794
3_775183_775458	AT3G03305	AT3G03305	3	775368	778396	-	2938	3UTR	57.638
3_1034646_1034973	AT3G03990	AT3G03990	3	1033579	1035237	+	1067	3UTR	78.1076
3_1127319_1127699	AT3G04270	AT3G04270	3	1127681	1128125	-	426	3UTR	98.0385
3_2366138_2366645	AIR12	AT3G07390	3	2365301	2366496	+	837	3UTR	86.7263
3_2378627_2378912	AT3G07425	AT3G07425	3	2378219	2378805	+	408	3UTR	54.406
3_2573608_2574016	AT3G08490	AT3G08490	3	2573840	2575258	-	1242	3UTR	62.4861
3_2605426_2605745	AAC1	AT3G08580	3	2605435	2607895	-	2150	3UTR	53.3286
3_2644760_2645147	UBC12	AT3G08700	3	2643144	2644775	+	1616	3UTR	82.9556
3_3172909_3173306	GYRB1	AT3G10270	3	3173299	3179786	-	6480	3UTR	77.5689
3_3510442_3510693	AT3G11210	AT3G11210	3	3510663	3513379	-	2686	3UTR	53.8673
3_3628232_3628601	AT3G11530	AT3G11530	3	3628530	3630536	-	1935	3UTR	64.1021
3_4516236_4516515	BGAL1	AT3G13750	3	4510965	4516478	+	5271	3UTR	64.1021
3_4584420_4584758	AT3G13898	AT3G13898	3	4583315	4584487	+	1105	3UTR	77.5689
3_5252725_5252976	AT3G15530	AT3G15530	3	5252699	5254562	-	1586	3UTR	70.0275
3_5338549_5338828	AT3G15760	AT3G15760	3	5337475	5338562	+	1074	3UTR	63.0247
3_5583160_5583418	JAL31	AT3G16430	3	5581568	5583258	+	1592	3UTR	51.7126
3_6186808_6187103	AT3G18060	AT3G18060	3	6183612	6187151	+	3196	3UTR	58.1767
3_6280532_6281276	BTS	AT3G18290	3	6273966	6280562	+	6566	3UTR	117.969
3_6327570_6327836	AT3G18430	AT3G18430	3	6325858	6327692	+	1712	3UTR	52.7899
3_6714302_6714658	PUB25	AT3G19380	3	6714133	6716178	-	1520	3UTR	88.881
3_6747195_6747452	ATCAD4	AT3G19450	3	6744377	6747238	+	2818	3UTR	65.7181
3_7618560_7618890	TWD1	AT3G21640	3	7618851	7621477	-	2587	3UTR	51.1739
3_7632923_7633369	AT3G21680	AT3G21680	3	7633214	7634223	-	854	3UTR	92.1131
3_7908703_7908952	AOX1A	AT3G22370	3	7906521	7908746	+	2182	3UTR	67.3341
3_8476014_8476576	AT3G23600	AT3G23600	3	8473627	8476024	+	2387	3UTR	96.4225
3_8604977_8605313	GAE6	AT3G23820	3	8603212	8605810	+	1765	3UTR	109.889
3_8919467_8919794	ALDH2C4	AT3G24503	3	8919560	8923296	-	3502	3UTR	68.4115
3_9066105_9066368	AT3G24830	AT3G24830	3	9064525	9066180	+	1580	3UTR	53.3286
3_9827533_9827860	AT3G26730	AT3G26730	3	9823524	9827547	+	4009	3UTR	71.1048
3_9929980_9930292	DRB3	AT3G26932	3	9929996	9932249	-	1957	3UTR	56.5607
3_11011405_11011742	EXPA5	AT3G29030	3	11011262	11013451	-	1709	3UTR	59.254
3_16556831_16557196	AT3G45210	AT3G45210	3	16556684	16558169	-	973	3UTR	61.4087
3_17560518_17560947	TCP14	AT3G47620	3	17558793	17561259	+	1725	3UTR	92.1131
3_17868371_17868728	AT3G48240	AT3G48240	3	17867131	17868460	+	1240	3UTR	74.3369
3_18634997_18635310	CEJ1	AT3G50260	3	18634546	18635514	+	451	3UTR	47.9419
3_18814192_18814552	DWF4	AT3G50660	3	18813949	18817405	-	2853	3UTR	93.7291
3_18931664_18932095	BCS1	AT3G50930	3	18929526	18932181	+	2138	3UTR	98.5771
3_19147977_19148296	AT3G51620	AT3G51620	3	19143334	19148244	+	4643	3UTR	54.9446
3_19163814_19164085	AT3G51660	AT3G51660	3	19163995	19165322	-	1237	3UTR	56.022
3_20131742_20132103	AT3G54363	AT3G54363	3	20132068	20132535	-	432	3UTR	89.9584
3_20809977_20810362	AT3G56080	AT3G56080	3	20810309	20813110	-	2748	3UTR	71.6435
3_21251801_21252450	AT3G57420	AT3G57420	3	21252354	21255482	-	3032	3UTR	125.511
3_21344177_21344719	AT3G57640	AT3G57640	3	21344708	21346235	-	1516	3UTR	113.66
3_21716674_21716951	WRKY69	AT3G58710	3	21714911	21716916	+	1763	3UTR	64.1021
3_22102330_22102710	AT3G59830	AT3G59830	3	22102647	22105441	-	2731	3UTR	73.2595
3_22188590_22188888	AT3G60080	AT3G60080	3	22187275	22188934	+	1315	3UTR	66.7954
3_22281108_22281821	AT3G60286	AT3G60286	3	22281629	22283719	-	1898	3UTR	122.817
3_22787724_22787989	SLD1	AT3G61580	3	22786022	22787972	+	1702	3UTR	66.7954
3_22941229_22941597	AT3G61950	AT3G61950	3	22939388	22941508	+	1841	3UTR	69.4888
3_23016078_23016343	VGDH2	AT3G62170	3	23016174	23018509	-	2166	3UTR	54.9446
3_23452681_23452932	AT3G63510	AT3G63510	3	23450536	23452794	+	2145	3UTR	47.4032
4_299111_299414	ANL2	AT4G00730	4	299261	304612	-	5198	3UTR	53.3286
4_944281_944636	GATL6	AT4G02130	4	944324	947249	-	2613	3UTR	84.5717
4_2506676_2506997	None	AT4G04925	4	2505979	2506786	+	697	3UTR	67.3341
4_6561630_6561884	AT4G10613	AT4G10613	4	6560363	6561726	+	1267	3UTR	41.4778
4_7936367_7936704	UNE16	AT4G13640	4	7936592	7938705	-	2001	3UTR	68.9501
4_9459639_9459892	AT4G16810	AT4G16810	4	9459870	9462253	-	2361	3UTR	49.5579
4_9825002_9825444	AT4G17620	AT4G17620	4	9821874	9825039	+	3128	3UTR	115.276
4_9929548_9930093	PYR1	AT4G17870	4	9928587	9929875	+	961	3UTR	110.428
4_10913277_10913581	AT4G20210	AT4G20210	4	10913470	10918371	-	4790	3UTR	58.7154
4_10958925_10959230	AT4G20300	AT4G20300	4	10955311	10959239	+	3614	3UTR	70.0275
4_11546383_11546921	AT4G21740	AT4G21740	4	11545631	11546716	+	752	3UTR	150.828
4_11590743_11591163	MSRB9	AT4G21850	4	11591116	11592425	-	1262	3UTR	78.1076
4_11907898_11908195	AT4G22620	AT4G22620	4	11907355	11908357	+	543	3UTR	51.7126
4_12573035_12573595	WRKY7	AT4G24240	4	12571538	12573783	+	1497	3UTR	140.055
4_12609247_12609555	AT4G24340	AT4G24340	4	12607371	12609252	+	1876	3UTR	65.7181
4_12632975_12633340	AT4G24430	AT4G24430	4	12629951	12633132	+	3024	3UTR	77.0302
4_12792556_12792901	AT4G24830	AT4G24830	4	12792827	12796031	-	3130	3UTR	85.649
4_12876732_12877151	AT4G25070	AT4G25070	4	12872379	12876734	+	4353	3UTR	61.4087
4_13568341_13568601	AT4G27020	AT4G27020	4	13568367	13571495	-	2894	3UTR	56.5607
4_13614259_13614516	SESA4	AT4G27170	4	13613596	13614283	+	663	3UTR	51.7126
4_13791551_13791811	GTG2	AT4G27630	4	13791642	13797305	-	5494	3UTR	53.8673
4_13960691_13961140	AT4G28088	AT4G28088	4	13961134	13961611	-	471	3UTR	80.8009
4_14321552_14321876	emb2726	AT4G29060	4	14317226	14321575	+	4326	3UTR	73.7982
4_14708326_14708655	AT4G30090	AT4G30090	4	14708624	14711685	-	3030	3UTR	68.9501
4_14759899_14760194	VLN4	AT4G30160	4	14753232	14760236	+	6667	3UTR	61.9474
4_14770230_14770508	HA2	AT4G30190	4	14770395	14776247	-	5739	3UTR	64.6408
4_14850900_14851172	AT4G30350	AT4G30350	4	14847583	14851248	+	3317	3UTR	69.4888
4_14881552_14881928	GAE1	AT4G30440	4	14881689	14883583	-	1655	3UTR	77.0302
4_14971603_14971903	PDE327	AT4G30720	4	14971833	14975528	-	3625	3UTR	54.406
4_15275743_15276204	AT4G31510	AT4G31510	4	15276076	15277505	-	1301	3UTR	109.351
4_15589619_15589922	AT4G32290	AT4G32290	4	15589434	15591213	-	1291	3UTR	58.1767
4_15762715_15763238	AT4G32680	AT4G32680	4	15763237	15765169	-	1931	3UTR	100.732
4_15854428_15854785	nPAP	AT4G32850	4	15849711	15855194	+	4717	3UTR	57.638
4_16083159_16083468	SPPL1	AT4G33410	4	16080760	16083398	+	2399	3UTR	61.9474
4_16171341_16171727	AGD2	AT4G33680	4	16171681	16174723	-	2996	3UTR	74.8755
4_16354234_16354553	AT4G34140	AT4G34140	4	16350462	16354434	+	3772	3UTR	54.9446
4_16849147_16849588	PIRL4	AT4G35470	4	16846138	16849183	+	3009	3UTR	91.5744
4_17000493_17000838	LARP1c	AT4G35890	4	16997091	17000896	+	3402	3UTR	71.6435
4_17137102_17137458	FAH1	AT4G36220	4	17137313	17139777	-	2319	3UTR	67.3341
4_17194287_17194714	AT4G36390	AT4G36390	4	17194573	17197247	-	2533	3UTR	85.1103
4_17555973_17556239	CYP81H1	AT4G37310	4	17555899	17559104	-	2865	3UTR	68.9501
4_17769301_17769599	HAT22	AT4G37790	4	17768042	17769676	+	1259	3UTR	64.6408
5_266623_267006	AT5G01720	AT5G01720	5	266278	270646	-	3640	3UTR	91.0357
5_709552_709972	iqd2	AT5G03040	5	709948	713133	-	3161	3UTR	114.199
5_771475_771804	UBQ3	AT5G03240	5	771660	773515	-	1711	3UTR	87.265
5_1240347_1240657	AT5G04390	AT5G04390	5	1238820	1240517	+	1527	3UTR	70.5662
5_1578855_1579234	PRX52	AT5G05340	5	1578869	1580875	-	1641	3UTR	87.8037
5_2154557_2154966	AHBP-1B	AT5G06950	5	2150840	2154586	+	3717	3UTR	79.7236
5_2326331_2326879	AT5G07360	AT5G07360	5	2326687	2330462	-	3583	3UTR	76.4916
5_2777447_2777719	AT5G08565	AT5G08565	5	2775897	2777474	+	1550	3UTR	44.1712
5_2898754_2899174	PI-4KBETA2	AT5G09350	5	2899001	2906160	-	6986	3UTR	78.1076
5_3153475_3153869	AT5G10080	AT5G10080	5	3150586	3153494	+	2889	3UTR	73.7982
5_3181682_3181976	AT5G10150	AT5G10150	5	3181938	3184110	-	2134	3UTR	58.7154
5_3243595_3243938	AT5G10320	AT5G10320	5	3243915	3246839	-	2901	3UTR	74.3369
5_3335440_3336003	AT5G10560	AT5G10560	5	3336003	3339384	-	3381	3UTR	99.6545
5_3525627_3526078	AT5G11090	AT5G11090	5	3524677	3525846	+	950	3UTR	129.282
5_3679651_3679951	AT5G11500	AT5G11500	5	3676548	3679738	+	3103	3UTR	64.6408
5_3856918_3857256	LOG8	AT5G11950	5	3854388	3857243	+	2530	3UTR	64.1021
5_4153267_4153759	AT5G13090	AT5G13090	5	4153369	4154730	-	971	3UTR	106.657
5_4571048_4571333	MPL1	AT5G14180	5	4571294	4574679	-	3346	3UTR	60.3314
5_5251864_5252306	CXE17	AT5G16080	5	5252251	5253790	-	1484	3UTR	77.5689
5_5289140_5289743	AT5G16200	AT5G16200	5	5289401	5290506	-	763	3UTR	103.425
5_6719017_6719333	AT5G19875	AT5G19875	5	6718206	6719303	+	811	3UTR	59.254
5_7844004_7844391	AT5G23280	AT5G23280	5	7842607	7844649	+	1397	3UTR	71.6435
5_7913383_7913709	AT5G23460	AT5G23460	5	7912652	7913617	+	731	3UTR	71.1048
5_8558092_8558433	AT5G24890	AT5G24890	5	8557737	8559488	-	1055	3UTR	79.7236
5_9685283_9685683	CNI1	AT5G27420	5	9683988	9685742	+	1295	3UTR	86.1877
5_10292247_10292609	AT5G28300	AT5G28300	5	10292279	10295283	-	2674	3UTR	78.6463
5_15265420_15265685	AT5G38210	AT5G38210	5	15260750	15265630	+	4670	3UTR	58.7154
5_16732623_16732977	CIP1	AT5G41790	5	16725753	16732847	+	6870	3UTR	64.6408
5_17625184_17625471	HSFA6A	AT5G43840	5	17625353	17626487	-	1016	3UTR	64.1021
5_17790203_17790588	RLT2	AT5G44180	5	17782428	17790234	+	7775	3UTR	63.0247
5_17807395_17807657	ERF9	AT5G44210	5	17806397	17807541	+	998	3UTR	50.6353
5_18589341_18589628	DOG1	AT5G45830	5	18589418	18591506	-	1878	3UTR	65.7181
5_18779511_18779826	AT5G46295	AT5G46295	5	18779790	18780205	-	379	3UTR	67.8728
5_18926274_18926541	AT5G46640	AT5G46640	5	18924429	18926984	+	1845	3UTR	59.7927
5_18982892_18983610	PYL1	AT5G46790	5	18983540	18984923	-	1313	3UTR	160.525
5_19236504_19236828	AT5G47430	AT5G47430	5	19235555	19241263	-	4435	3UTR	64.6408
5_19627753_19628060	AT5G48430	AT5G48430	5	19627634	19629167	-	1107	3UTR	80.2623
5_20156252_20156549	XK-2	AT5G49650	5	20152731	20156613	+	3521	3UTR	65.7181
5_20323555_20323851	AT5G49960	AT5G49960	5	20323785	20327881	-	4030	3UTR	67.8728
5_20960869_20961222	PLE	AT5G51600	5	20960779	20964537	-	3315	3UTR	61.4087
5_21123701_21124254	AT5G52020	AT5G52020	5	21123958	21125065	-	811	3UTR	102.348
5_21151912_21152211	BAG1	AT5G52060	5	21152011	21154395	-	2184	3UTR	73.7982
5_21717864_21718310	AT5G53480	AT5G53480	5	21713245	21717878	+	4619	3UTR	116.353
5_22689632_22690440	HSP81-2	AT5G56030	5	22686473	22689671	+	3159	3UTR	143.826
5_23035419_23035738	NAP1%3B3	AT5G56950	5	23032449	23035693	+	2970	3UTR	62.4861
5_23439291_23439624	AT5G57860	AT5G57860	5	23437532	23439403	+	1759	3UTR	90.4971
5_23516721_23517197	AT5G58110	AT5G58110	5	23515150	23516751	+	1571	3UTR	97.4998
5_23833343_23833698	COPT1	AT5G59030	5	23833493	23834745	-	1047	3UTR	76.4916
5_23883086_23883401	AT5G59170	AT5G59170	5	23881988	23883122	+	1098	3UTR	82.9556
5_24325791_24326089	FLA12	AT5G60490	5	24325457	24326827	-	738	3UTR	66.2568
5_24453307_24453631	ABCF1	AT5G60790	5	24453258	24456115	-	2484	3UTR	80.8009
5_24510909_24511472	COB	AT5G60920	5	24511152	24514338	-	2866	3UTR	98.5771
5_24738770_24739156	AT5G61520	AT5G61520	5	24739026	24741401	-	2245	3UTR	65.7181
5_24878470_24878778	ML1	AT5G61960	5	24878507	24884852	-	6074	3UTR	59.7927
5_25111665_25112241	AT5G62560	AT5G62560	5	25109840	25112001	+	1825	3UTR	117.431
5_26002562_26002826	MAF5	AT5G65080	5	25997504	26002619	+	5058	3UTR	52.7899
5_26369706_26370147	AT5G65925	AT5G65925	5	26369045	26369854	+	661	3UTR	117.969
5_26426977_26427409	AT5G66090	AT5G66090	5	26425680	26427172	+	1297	3UTR	71.6435
5_26438637_26438889	AT5G66150	AT5G66150	5	26438839	26444434	-	5545	3UTR	49.5579
5_26452923_26453308	ARO2	AT5G66200	5	26453276	26456154	-	2846	3UTR	77.5689
5_26667380_26667648	AT5G66790	AT5G66790	5	26664842	26667809	+	2538	3UTR	68.9501
5_26863803_26864535	NRAMP4	AT5G67330	5	26861266	26863897	+	2537	3UTR	113.66
5_26877123_26877599	CGLD27	AT5G67370	5	26877272	26879639	-	2040	3UTR	83.4943
1_356421_356685	AT1G02030	AT1G02030	1	355124	357258	-	573	5UTR	49.5579
1_2212278_2212587	AT1G07200	AT1G07200	1	2208477	2212718	-	131	5UTR	77.0302
1_2927508_2927781	SRC2	AT1G09070	1	2927502	2929107	+	6	5UTR	69.4888
1_3323259_3323701	AT1G10140	AT1G10140	1	3322554	3323735	-	34	5UTR	131.436
1_5042334_5042601	BPC2	AT1G14685	1	5042240	5045556	+	94	5UTR	59.7927
1_6307851_6308233	EPR1	AT1G18330	1	6305814	6308243	-	10	5UTR	65.1794
1_7143559_7143868	CAT3	AT1G20620	1	7142972	7146540	+	587	5UTR	64.1021
1_8661849_8662118	AT1G24440	AT1G24440	1	8661838	8664007	+	11	5UTR	53.8673
1_9178228_9178514	BGLU40	AT1G26560	1	9178212	9181967	+	16	5UTR	48.4806
1_10727625_10728074	ABCC1	AT1G30400	1	10727317	10738092	+	308	5UTR	85.1103
1_11532381_11532629	PRK	AT1G32060	1	11532199	11534639	+	182	5UTR	56.5607
1_17910969_17911453	AT1G48460	AT1G48460	1	17910779	17913344	+	190	5UTR	152.444
1_18316430_18316815	RTV1	AT1G49480	1	18314117	18316861	-	46	5UTR	80.2623
1_19124824_19125266	AT1G51570	AT1G51570	1	19122161	19125375	-	109	5UTR	93.1904
1_19506458_19506739	AT1G52370	AT1G52370	1	19506356	19508934	+	102	5UTR	46.8645
1_20385085_20385373	PES1	AT1G54570	1	20380435	20385380	-	7	5UTR	54.406
1_20948065_20948374	NAC1	AT1G56010	1	20946571	20949281	-	907	5UTR	60.87
1_25875387_25875641	STN7	AT1G68830	1	25872412	25875662	-	21	5UTR	71.1048
1_26618142_26618528	AT1G70590	AT1G70590	1	26618099	26620421	+	43	5UTR	84.033
1_26887289_26887613	GDPD4	AT1G71340	1	26885170	26888364	-	751	5UTR	70.0275
1_27054073_27054374	SUC1	AT1G71880	1	27054030	27056464	+	43	5UTR	87.265
1_27581916_27582672	HDG11	AT1G73360	1	27578421	27582685	-	13	5UTR	96.4225
1_27741421_27741970	AT1G73760	AT1G73760	1	27739168	27742008	-	38	5UTR	93.1904
1_27886124_27886375	TRM4	AT1G74160	1	27885911	27891436	+	213	5UTR	56.5607
1_28705034_28705296	SOB3	AT1G76500	1	28704963	28706691	+	71	5UTR	60.3314
1_28865362_28865710	AT1G76880	AT1G76880	1	28865314	28868225	+	48	5UTR	103.425
1_29364083_29364463	RAP2.4	AT1G78080	1	29364072	29366207	+	11	5UTR	101.271
1_29558177_29558886	TPS1	AT1G78580	1	29552340	29560912	-	2026	5UTR	145.98
1_29860573_29860881	RGLG4	AT1G79380	1	29860491	29863316	+	82	5UTR	64.6408
2_216668_216931	AT2G01480	AT2G01480	2	216605	221002	+	63	5UTR	56.022
2_8706653_8706982	PIL5	AT2G20180	2	8704024	8707009	-	27	5UTR	83.4943
2_9517006_9517689	AT2G22426	AT2G22426	2	9516910	9517386	+	96	5UTR	159.986
2_10122153_10122419	LYK4	AT2G23770	2	10119973	10122479	-	60	5UTR	58.1767
2_11120662_11120954	AT2G26110	AT2G26110	2	11120523	11122146	+	139	5UTR	70.5662
2_11620290_11620613	AT2G27180	AT2G27180	2	11620076	11621174	+	214	5UTR	59.7927
2_12984789_12985215	HSI2	AT2G30470	2	12980428	12985277	-	62	5UTR	114.199
2_15514929_15515235	AT2G36950	AT2G36950	2	15514923	15517002	+	6	5UTR	66.7954
2_15549383_15549633	TRFL8	AT2G37025	2	15549052	15552160	+	331	5UTR	60.87
2_15897304_15897684	AT2G37980	AT2G37980	2	15893800	15897805	-	121	5UTR	98.5771
2_16701742_16702257	HSPRO2	AT2G40000	2	16700490	16702336	-	79	5UTR	122.279
2_17336298_17337472	ACA4	AT2G41560	2	17332050	17337492	-	20	5UTR	172.914
2_17909060_17909416	IBH1	AT2G43060	2	17909007	17910210	+	53	5UTR	71.1048
2_18786310_18786576	AT2G45590	AT2G45590	2	18785990	18789113	+	320	5UTR	61.4087
2_19433758_19434057	AT2G47350	AT2G47350	2	19433725	19437544	+	33	5UTR	64.6408
3_206793_207192	AT3G01516	AT3G01516	3	205314	208220	+	1479	5UTR	79.1849
3_288309_288646	AT3G01810	AT3G01810	3	288158	292770	+	151	5UTR	76.4916
3_551081_551493	LPP3	AT3G02600	3	550975	554697	+	106	5UTR	76.4916
3_1477195_1477593	ATL6	AT3G05200	3	1476960	1478850	+	235	5UTR	79.7236
3_1609062_1609457	AT3G05545	AT3G05545	3	1609050	1612607	+	12	5UTR	96.4225
3_1864196_1864556	AT3G06150	AT3G06150	3	1861759	1864566	-	10	5UTR	62.4861
3_2314722_2315232	AT3G07270	AT3G07270	3	2313998	2317364	+	724	5UTR	91.0357
3_2510602_2510919	AT3G07870	AT3G07870	3	2510570	2512479	+	32	5UTR	55.4833
3_2694981_2695304	RAPTOR1	AT3G08850	3	2686457	2695400	-	96	5UTR	55.4833
3_3591470_3591790	AT3G11420	AT3G11420	3	3591251	3594589	+	219	5UTR	92.1131
3_3890705_3890997	Nek7	AT3G12200	3	3886957	3891000	-	3	5UTR	66.7954
3_4201454_4201720	ABCC3	AT3G13080	3	4195770	4201734	-	14	5UTR	61.4087
3_4393888_4394161	AT3G13480	AT3G13480	3	4392463	4394367	-	206	5UTR	50.0966
3_4633741_4634077	ATBRXL2	AT3G14000	3	4630865	4634081	-	4	5UTR	67.8728
3_4705504_4705752	AT3G14172	AT3G14172	3	4698457	4705828	-	76	5UTR	60.3314
3_5003519_5003783	AT3G14870	AT3G14870	3	5002271	5005877	+	1248	5UTR	54.9446
3_6958543_6958836	AT3G19970	AT3G19970	3	6958509	6961684	+	34	5UTR	67.8728
3_8641339_8641841	BAM1	AT3G23920	3	8641181	8644449	+	158	5UTR	71.6435
3_10338168_10338497	AT3G27880	AT3G27880	3	10338148	10339528	+	20	5UTR	81.8783
3_11974172_11974446	AT3G30380	AT3G30380	3	11973971	11976909	+	201	5UTR	58.7154
3_18476699_18476979	AT3G49810	AT3G49810	3	18474305	18477032	-	53	5UTR	78.6463
3_18840479_18840804	IDD2	AT3G50700	3	18840411	18843053	+	68	5UTR	65.7181
3_19143355_19143674	AT3G51620	AT3G51620	3	19143334	19148244	+	21	5UTR	72.1822
3_20590306_20590579	RTFL7	AT3G55515	3	20590263	20591401	+	43	5UTR	55.4833
3_21109587_21109913	ARR9	AT3G57040	3	21109059	21111567	+	528	5UTR	64.6408
3_22249112_22249377	AT3G60200	AT3G60200	3	22248892	22250568	+	220	5UTR	58.7154
3_22602885_22603139	PP2-A13	AT3G61060	3	22602816	22604582	+	69	5UTR	45.7872
3_22658263_22658576	AT3G61200	AT3G61200	3	22657455	22658582	-	6	5UTR	70.0275
3_23374753_23375074	ATMRK1	AT3G63260	3	23372878	23375405	-	331	5UTR	68.4115
3_23377360_23377639	AT3G63270	AT3G63270	3	23375584	23377661	-	22	5UTR	49.0192
4_84480_84742	AT4G00200	AT4G00200	4	82309	84770	-	28	5UTR	54.9446
4_5640419_5640816	AT4G08850	AT4G08850	4	5636479	5640952	-	136	5UTR	67.3341
4_6434474_6434736	NIP5%3B1	AT4G10380	4	6431161	6435396	-	660	5UTR	58.1767
4_7945771_7946151	PRR2	AT4G13660	4	7945683	7948443	+	88	5UTR	56.5607
4_9302117_9302422	AT4G16500	AT4G16500	4	9300721	9302434	-	12	5UTR	56.022
4_9928646_9929071	PYR1	AT4G17870	4	9928587	9929875	+	59	5UTR	79.7236
4_11180718_11181040	AT4G20880	AT4G20880	4	11178992	11181049	-	9	5UTR	59.7927
4_12012470_12012938	FZR2	AT4G22910	4	12012408	12016012	+	62	5UTR	120.663
4_12563331_12563663	SLY1	AT4G24210	4	12563279	12564482	+	52	5UTR	70.0275
4_12571588_12571868	WRKY7	AT4G24240	4	12571538	12573783	+	50	5UTR	65.1794
4_13154777_13155065	PUM6	AT4G25880	4	13154708	13159382	+	69	5UTR	65.7181
4_13444820_13445076	AT4G26650	AT4G26650	4	13444797	13448212	+	23	5UTR	61.4087
4_14969412_14969722	QWRF8	AT4G30710	4	14965143	14969763	-	41	5UTR	71.6435
4_15291568_15291910	WRKY11	AT4G31550	4	15289788	15291934	-	24	5UTR	98.5771
4_17643182_17643641	AT4G37550	AT4G37550	4	17643110	17645830	+	72	5UTR	72.7208
4_18296615_18297051	CESA2	AT4G39350	4	18296388	18302192	+	227	5UTR	102.887
5_76905_77169	AT5G01200	AT5G01200	5	76872	78543	+	33	5UTR	57.0993
5_807133_807392	AT5G03330	AT5G03330	5	806964	810401	+	169	5UTR	48.4806
5_3256557_3256844	AT5G10350	AT5G10350	5	3255236	3257811	-	967	5UTR	56.022
5_3524691_3524944	AT5G11090	AT5G11090	5	3524677	3525846	+	14	5UTR	71.1048
5_4254830_4255334	CRN	AT5G13290	5	4252842	4255378	-	44	5UTR	81.3396
5_4582357_4582761	AT5G14210	AT5G14210	5	4578378	4582856	-	95	5UTR	77.5689
5_6868922_6869189	DCL4	AT5G20320	5	6859212	6869307	-	118	5UTR	59.7927
5_8342816_8343239	AT5G24430	AT5G24430	5	8338925	8343284	-	45	5UTR	85.649
5_16537679_16537969	AT5G41330	AT5G41330	5	16535339	16538016	-	47	5UTR	66.2568
5_17731083_17731377	AT5G44060	AT5G44060	5	17731005	17732298	+	78	5UTR	53.8673
5_18387583_18388353	UMAMIT1	AT5G45370	5	18387091	18390450	+	492	5UTR	140.055
5_19366162_19366496	FRA1	AT5G47820	5	19366133	19372815	+	29	5UTR	51.7126
5_20764221_20764599	ERD1	AT5G51070	5	20764096	20768764	+	125	5UTR	95.3451
5_22957629_22957894	NDL1	AT5G56750	5	22957629	22960916	+	0	5UTR	51.7126
5_23015638_23015997	AT5G56890	AT5G56890	5	23010423	23016015	-	18	5UTR	68.4115
5_23087133_23087385	ABI2	AT5G57050	5	23087122	23089631	+	11	5UTR	56.5607
5_23310599_23310861	AT5G57565	AT5G57565	5	23310284	23311855	+	315	5UTR	67.3341
5_23414059_23414319	AT5G57790	AT5G57790	5	23411887	23414811	-	492	5UTR	63.0247
5_23974570_23974869	AT5G59450	AT5G59450	5	23974458	23976791	+	112	5UTR	66.2568
5_23999869_24000128	RDUF2	AT5G59550	5	23998164	24000166	-	38	5UTR	46.8645
5_24884105_24884733	ML1	AT5G61960	5	24878507	24884852	-	119	5UTR	159.447
5_26644323_26644601	IDD1	AT5G66730	5	26641586	26644738	-	137	5UTR	68.9501
5_26833162_26833607	SKIP2	AT5G67250	5	26831185	26833903	-	296	5UTR	109.351
Mt_297426_298183	atp6-2	ATMG01170	Mt	296820	298204	-	21	5UTR	406.159
1_5339767_5340119	AT1G15530	AT1G15530	1	5339961	5341931	-	1812	Exon	70.0275
3_2008683_2009137	MYB108	AT3G06490	3	2003393	2006727	+	5290	Exon	107.196
3_21056017_21056443	AT3G56870	AT3G56870	3	21052434	21055721	+	3583	Exon	85.1103
3_21332924_21333623	AT3G57600	AT3G57600	3	21332774	21333918	+	150	Exon	162.679
3_22886972_22887289	AT3G61829	AT3G61829	3	22887191	22887322	-	33	Exon	92.6517
4_18127477_18127745	SAUR15	AT4G38850	4	18126057	18126829	+	1420	Exon	60.87
5_21101252_21101595	AT5G51930	AT5G51930	5	21101116	21103818	+	136	Exon	56.5607
5_24482556_24482849	OBP4	AT5G60850	5	24480291	24482163	+	2265	Exon	47.4032
Pt_69029_69707	rps12	ATCG00065	Pt	69611	69724	-	17	Exon	10755.7
Pt_18436_21473	rpoC1	ATCG00180	Pt	20251	23084	-	1611	Exon	45028.7
Pt_37925_41838	psaA	ATCG00350	Pt	39605	41857	-	19	Exon	64284.2
Pt_48635_49036	ndhJ	ATCG00420	Pt	48677	49153	-	117	Exon	7615.22
Pt_49458_49867	ndhK	ATCG00430	Pt	49257	49934	-	67	Exon	7812.37
Pt_52348_54080	atpB	ATCG00480	Pt	52660	54156	-	76	Exon	27547.7
Pt_54969_55447	rbcL	ATCG00490	Pt	54958	56397	+	11	Exon	9713.35
Pt_56067_56361	rbcL	ATCG00490	Pt	54958	56397	+	1109	Exon	7133.65
Pt_57878_58489	accD	ATCG00500	Pt	57075	58541	+	803	Exon	10212.2
Pt_59872_60847	ycf4	ATCG00520	Pt	59772	60326	+	100	Exon	14157.4
Pt_118614_118868	ndhG	ATCG01080	Pt	118377	118907	-	39	Exon	5252.6
Pt_124489_124823	TIC214	ATCG01130	Pt	123884	129244	-	4421	Exon	5264.99
Pt_125153_125780	TIC214	ATCG01130	Pt	123884	129244	-	3464	Exon	7752.04
Pt_126048_128240	TIC214	ATCG01130	Pt	123884	129244	-	1004	Exon	24830.1
Mt_190321_191145	None	ATMG00670	Mt	191055	191882	-	737	Exon	992.774
Mt_363902_364656	None	ATMG01400	Mt	363725	364042	+	177	Exon	910.896
1_68584_69241	AT1G01150	AT1G01150	1	69911	72138	-	2897	Intergenic	115.276
1_99271_99726	AT1G01230	AT1G01230	1	97412	99240	+	1859	Intergenic	78.6463
1_501337_501963	AT1G02460	AT1G02460	1	504463	507268	-	5305	Intergenic	113.121
1_687192_687677	PEX6	AT1G03000	1	687795	692660	-	4983	Intergenic	96.9611
1_978778_979275	PHB2	AT1G03860	1	979307	982002	-	2727	Intergenic	71.1048
1_1030381_1030718	PSAT1	AT1G04010	1	1030957	1036264	-	5546	Intergenic	63.5634
1_1102034_1102290	EIF2 GAMMA	AT1G04170	1	1096882	1099901	+	5152	Intergenic	54.406
1_1315889_1316273	KAB1	AT1G04690	1	1313443	1315823	+	2446	Intergenic	61.4087
1_1693746_1694046	AT1G05660	AT1G05660	1	1694070	1696191	-	2145	Intergenic	65.1794
1_1884542_1884812	AT1G06170	AT1G06170	1	1884981	1886904	-	2092	Intergenic	71.6435
1_1919916_1920194	LBD2	AT1G06280	1	1920307	1920949	-	755	Intergenic	53.3286
1_2457390_2457965	AT1G07920	AT1G07920	1	2454771	2457321	+	2619	Intergenic	81.8783
1_2573318_2573785	AXS2	AT1G08200	1	2573818	2576844	-	3059	Intergenic	99.1158
1_3261479_3262039	AT1G09995	AT1G09995	1	3262222	3263642	-	1603	Intergenic	118.508
1_3786939_3787284	AT1G11280	AT1G11280	1	3787318	3790935	-	3651	Intergenic	78.1076
1_3886083_3886637	AT1G11572	AT1G11572	1	3884342	3884960	+	1741	Intergenic	102.887
1_4039175_4039544	AT1G11960	AT1G11960	1	4039566	4044046	-	4502	Intergenic	67.8728
1_4060667_4061348	AT1G12020	AT1G12020	1	4061363	4063549	-	2201	Intergenic	134.13
1_4128364_4128684	AT1G12160	AT1G12160	1	4125990	4128310	+	2374	Intergenic	53.8673
1_4182552_4182981	AT1G12300	AT1G12300	1	4183010	4186247	-	3266	Intergenic	73.2595
1_4535779_4536088	GATL3	AT1G13250	1	4528485	4530222	-	5557	Intergenic	77.0302
1_4586870_4587160	AT1G13370	AT1G13370	1	4587780	4588661	-	1501	Intergenic	82.417
1_4692918_4693403	AT1G13680	AT1G13680	1	4690293	4692841	+	2625	Intergenic	150.29
1_4973576_4973964	PER4	AT1G14540	1	4974021	4975705	-	1741	Intergenic	107.735
1_5084559_5084811	AT1G14755	AT1G14755	1	5083676	5084342	+	883	Intergenic	56.5607
1_5646716_5647028	AT1G16515	AT1G16515	1	5647462	5648114	-	1086	Intergenic	91.0357
1_5722674_5723121	HAC12	AT1G16710	1	5713794	5722614	+	8880	Intergenic	82.9556
1_5998622_5999102	ELF4-L4	AT1G17455	1	5997057	5998599	+	1565	Intergenic	95.3451
1_6511798_6512339	WRKY61	AT1G18860	1	6508797	6511397	+	3001	Intergenic	113.66
1_6865621_6866151	AT1G19835	AT1G19835	1	6855899	6860563	-	5058	Intergenic	136.284
1_7236109_7236371	AT1G20816	AT1G20816	1	7233654	7235128	+	2455	Intergenic	43.0938
1_7540110_7540417	AT1G21528	AT1G21528	1	7542615	7543077	-	2660	Intergenic	65.1794
1_7637622_7637963	AT1G21730	AT1G21730	1	7630107	7636658	+	7515	Intergenic	63.5634
1_7975471_7975729	AT1G22570	AT1G22570	1	7976424	7978810	-	3081	Intergenic	49.0192
1_8215862_8216125	AT1G23170	AT1G23170	1	8212556	8215807	+	3306	Intergenic	54.406
1_8880823_8881084	AT1G25320	AT1G25320	1	8877790	8880388	+	3033	Intergenic	52.7899
1_8925068_8925519	CLE43	AT1G25425	1	8922416	8923879	+	2652	Intergenic	113.121
1_9095052_9095441	AT1G26300	AT1G26300	1	9095768	9099766	-	4325	Intergenic	69.4888
1_9353610_9353901	KDR	AT1G26945	1	9351160	9352833	+	2450	Intergenic	70.0275
1_10266941_10267271	PUB17	AT1G29340	1	10264043	10266917	+	2898	Intergenic	56.022
1_10296868_10297122	PAI3	AT1G29410	1	10297750	10300073	-	2951	Intergenic	49.5579
1_10384587_10384868	AT1G29700	AT1G29700	1	10384945	10387441	-	2573	Intergenic	60.3314
1_10456011_10456358	WRKY71	AT1G29860	1	10454433	10455874	+	1578	Intergenic	52.7899
1_10573873_10574122	NCED5	AT1G30100	1	10571310	10573365	+	2563	Intergenic	51.1739
1_10826944_10827439	G3Pp3	AT1G30560	1	10824637	10826405	+	2307	Intergenic	116.892
1_11348436_11348722	AT1G31690	AT1G31690	1	11343854	11347945	+	4582	Intergenic	47.4032
1_11620147_11620534	RCD1	AT1G32230	1	11611891	11617419	+	8256	Intergenic	65.1794
1_11807047_11807343	AT1G32650	AT1G32650	1	11810531	11810724	-	3381	Intergenic	59.254
1_12429733_12430003	IP5PI	AT1G34120	1	12426700	12429714	+	3033	Intergenic	67.3341
1_13075356_13075634	AT1G35510	AT1G35510	1	13071165	13074984	+	4191	Intergenic	60.87
1_13140325_13140612	AT1G35610	AT1G35610	1	13143061	13144988	-	4376	Intergenic	54.9446
1_14150232_14150493	NIA2	AT1G37130	1	14158452	14161938	+	7959	Intergenic	47.9419
1_17839807_17840246	AT1G48280	AT1G48280	1	17835032	17837781	+	4775	Intergenic	71.6435
1_18628297_18628552	TAF15	AT1G50300	1	18628555	18632039	-	3487	Intergenic	45.2485
1_19853257_19853736	mMDH1	AT1G53240	1	19854615	19857146	-	3410	Intergenic	82.417
1_20068601_20068958	AT1G53760	AT1G53760	1	20068965	20071171	-	2213	Intergenic	65.1794
1_20094084_20094500	AT1G53820	AT1G53820	1	20091491	20092423	+	2593	Intergenic	72.1822
1_20170028_20170338	MVP1	AT1G54030	1	20167597	20169684	+	2431	Intergenic	71.1048
1_20177722_20177982	AT1G54050	AT1G54050	1	20179357	20180566	-	2584	Intergenic	60.3314
1_20245316_20245939	AT1G54220	AT1G54220	1	20246026	20250345	-	4406	Intergenic	92.1131
1_20956684_20957023	AT1G56030	AT1G56030	1	20957098	20958550	-	1527	Intergenic	72.7208
1_22640869_22641155	AT1G61370	AT1G61370	1	22641843	22645922	-	4767	Intergenic	58.1767
1_22876919_22877175	AT1G61900	AT1G61900	1	22882176	22885125	-	7950	Intergenic	49.5579
1_23527006_23527336	AT1G63430	AT1G63430	1	23522449	23526832	+	4557	Intergenic	59.254
1_23539056_23539438	AT1G63480	AT1G63480	1	23539557	23542233	-	2795	Intergenic	83.4943
1_24011820_24012071	AT1G64620	AT1G64620	1	24006913	24009415	+	4907	Intergenic	41.4778
1_24356048_24356444	AT1G65490	AT1G65490	1	24354646	24355490	+	1402	Intergenic	56.5607
1_24487624_24488202	AT1G65820	AT1G65820	1	24485046	24486954	+	2578	Intergenic	103.425
1_24755079_24755448	MYB113	AT1G66370	1	24753589	24754761	+	1490	Intergenic	52.2513
1_24831085_24831472	WRKY67	AT1G66550	1	24828502	24829660	+	2583	Intergenic	67.8728
1_26136083_26136539	AT1G69526	AT1G69526	1	26131294	26133313	+	4789	Intergenic	86.7263
1_26144327_26144612	AGL94	AT1G69540	1	26145001	26147751	-	3139	Intergenic	59.7927
1_26776146_26776458	FAB1C	AT1G71010	1	26782048	26788973	+	5590	Intergenic	59.7927
1_26855266_26855528	AT1G71235	AT1G71235	1	26854559	26855222	+	707	Intergenic	59.7927
1_27638506_27638844	MKK9	AT1G73500	1	27639091	27640643	-	1799	Intergenic	78.6463
1_28391700_28391972	AT1G75600	AT1G75600	1	28390665	28391585	+	1035	Intergenic	58.7154
1_28521990_28522238	AT1G75980	AT1G75980	1	28522554	28524418	-	2180	Intergenic	46.3259
1_28676500_28676788	PHT1%3B9	AT1G76430	1	28678935	28682062	-	5274	Intergenic	54.9446
1_28925326_28925592	AT1G76980	AT1G76980	1	28925708	28927391	-	1799	Intergenic	56.5607
1_29466935_29467350	GSTU23	AT1G78320	1	29467412	29468394	-	1044	Intergenic	105.58
1_29602069_29602444	BEH4	AT1G78700	1	29599349	29601682	+	2720	Intergenic	69.4888
1_30156180_30156566	AT1G80180	AT1G80180	1	30156682	30157808	-	1242	Intergenic	108.273
2_877945_878237	AT2G03000	AT2G03000	2	875233	877207	+	2712	Intergenic	49.0192
2_1468125_1468424	XERICO	AT2G04240	2	1461548	1462944	-	5181	Intergenic	54.406
2_3110704_3110981	AT2G07505	AT2G07505	2	3125671	3126173	+	14690	Intergenic	63.5634
2_7905350_7905762	MPK7	AT2G18170	2	7907774	7910040	-	4278	Intergenic	88.3424
2_8215685_8216192	HPT1	AT2G18950	2	8207199	8210513	+	8486	Intergenic	110.967
2_8670415_8670667	AT2G20080	AT2G20080	2	8662892	8665026	-	5389	Intergenic	52.7899
2_9456925_9457553	AAT	AT2G22250	2	9457786	9460919	-	3366	Intergenic	109.889
2_9731533_9731837	GRF1	AT2G22840	2	9728480	9731301	+	3053	Intergenic	62.4861
2_10069389_10069787	AT2G23680	AT2G23680	2	10066117	10067737	+	3272	Intergenic	89.4197
2_10204552_10205004	AT2G23987	AT2G23987	2	10205031	10206259	-	1255	Intergenic	68.9501
2_10858025_10858298	AT2G25510	AT2G25510	2	10856271	10857217	+	1754	Intergenic	56.022
2_11549178_11549460	EIL1	AT2G27050	2	11545656	11548293	+	3522	Intergenic	52.2513
2_11839286_11839759	AT2G27775	AT2G27775	2	11842236	11843361	-	3602	Intergenic	78.1076
2_11947006_11947818	AT2G28060	AT2G28060	2	11949871	11952253	-	4435	Intergenic	120.663
2_12091210_12091773	AT2G28315	AT2G28315	2	12088667	12090765	+	2543	Intergenic	95.8838
2_12107319_12107780	GATA13	AT2G28340	2	12103672	12106262	+	3647	Intergenic	89.9584
2_12234220_12234663	RAD51B	AT2G28560	2	12235875	12239146	-	4483	Intergenic	129.82
2_12283783_12284121	EXO70H5	AT2G28640	2	12284281	12286842	-	2721	Intergenic	68.9501
2_12419706_12420102	AT2G28920	AT2G28920	2	12418017	12418576	+	1689	Intergenic	91.0357
2_12766840_12767346	ABCG31	AT2G29940	2	12759973	12766794	+	6867	Intergenic	77.0302
2_12997103_12997669	NET4B	AT2G30500	2	12998105	13000825	-	3156	Intergenic	113.121
2_13231445_13231791	CLE4	AT2G31081	2	13238021	13238628	+	6230	Intergenic	61.4087
2_13514016_13514339	ARI9	AT2G31770	2	13511579	13513550	+	2437	Intergenic	56.5607
2_14122483_14122732	PDLP3	AT2G33330	2	14122806	14125526	-	2794	Intergenic	45.2485
2_14461825_14462114	AT2G34240	AT2G34240	2	14459157	14461802	+	2668	Intergenic	67.8728
2_14506080_14506383	AT2G34357	AT2G34357	2	14498590	14505809	+	7490	Intergenic	57.638
2_14638381_14638762	PHB	AT2G34710	2	14639323	14644355	-	5593	Intergenic	59.254
2_14692779_14693120	WRKY35	AT2G34830	2	14693696	14696803	-	3683	Intergenic	62.4861
2_15237971_15238221	AT2G36340	AT2G36340	2	15235487	15237904	+	2484	Intergenic	43.0938
2_15977579_15978129	ATMAK3	AT2G38130	2	15978377	15980763	-	2634	Intergenic	112.044
2_16374051_16374385	PLP6	AT2G39220	2	16374881	16377168	-	2783	Intergenic	75.4142
2_16843420_16843920	PYL6	AT2G40330	2	16844588	16846194	-	2274	Intergenic	122.279
2_17137820_17138112	AT2G41105	AT2G41105	2	17138333	17139159	-	1047	Intergenic	68.4115
2_17188976_17189340	GLU2	AT2G41220	2	17177539	17188836	+	11437	Intergenic	67.3341
2_17236825_17237120	AT2G41360	AT2G41360	2	17234057	17236385	+	2768	Intergenic	50.6353
2_17615532_17616561	AT2G42290	AT2G42290	2	17616760	17619736	-	3175	Intergenic	202.541
2_18122944_18123441	SSI2	AT2G43710	2	18119873	18122889	+	3071	Intergenic	84.033
2_18174796_18175287	AT2G43880	AT2G43880	2	18172889	18174705	+	1907	Intergenic	101.809
2_18363411_18363986	BGLU17	AT2G44480	2	18359663	18363346	+	3748	Intergenic	131.436
2_18469159_18469498	AT2G44800	AT2G44800	2	18466820	18468551	+	2339	Intergenic	94.2678
2_18580127_18580458	AT2G45040	AT2G45040	2	18577500	18578945	+	2627	Intergenic	88.881
2_18627281_18627677	AT2G45180	AT2G45180	2	18626188	18627157	+	1093	Intergenic	85.1103
2_18998984_18999557	LRB1	AT2G46260	2	18995645	18998672	+	3339	Intergenic	124.972
2_19048479_19048748	CPC	AT2G46410	2	19049021	19050369	-	1621	Intergenic	64.1021
2_19173640_19174105	AT2G46690	AT2G46690	2	19180705	19181600	+	6600	Intergenic	89.4197
2_19650467_19651090	AT2G48060	AT2G48060	2	19651108	19662723	-	11633	Intergenic	106.119
3_321905_322252	AT3G01940	AT3G01940	3	322460	323282	-	1030	Intergenic	67.8728
3_429379_429772	BIG	AT3G02260	3	430877	448680	-	18908	Intergenic	77.5689
3_634084_634355	ILR1	AT3G02875	3	631824	634074	+	2260	Intergenic	72.1822
3_704971_705263	AT3G03100	AT3G03100	3	705381	707697	-	2434	Intergenic	49.0192
3_984836_985485	SAUR26	AT3G03850	3	983057	983768	+	1779	Intergenic	107.735
3_986219_986483	SAUR26	AT3G03850	3	983057	983768	+	3162	Intergenic	65.1794
3_1210683_1211088	AT3G04500	AT3G04500	3	1211762	1213907	-	2819	Intergenic	78.1076
3_1269130_1269514	CLPS3	AT3G04680	3	1269722	1273004	-	3490	Intergenic	81.3396
3_1358303_1358848	WNK1	AT3G04910	3	1354536	1358235	+	3767	Intergenic	113.66
3_1601414_1601681	CPA	AT3G05520	3	1598449	1601437	+	2965	Intergenic	56.022
3_1644217_1644723	RLP32	AT3G05650	3	1644882	1648742	-	4019	Intergenic	83.4943
3_1743276_1743633	ATSK12	AT3G05840	3	1739777	1743163	+	3499	Intergenic	105.58
3_1760632_1760882	AT3G05900	AT3G05900	3	1761205	1763984	-	3102	Intergenic	65.7181
3_1817391_1817684	NP3	AT3G06030	3	1818732	1822858	-	5174	Intergenic	55.4833
3_1818267_1818522	NP3	AT3G06030	3	1818732	1822858	-	4336	Intergenic	43.6325
3_2113246_2114047	AT3G06680	AT3G06680	3	2114151	2114948	-	901	Intergenic	147.058
3_2663200_2663457	LTP6	AT3G08770	3	2664069	2664888	-	1431	Intergenic	57.638
3_3262533_3262803	AT3G10470	AT3G10470	3	3260141	3261854	+	2392	Intergenic	67.8728
3_3545736_3546083	AT3G11320	AT3G11320	3	3546276	3548877	-	2794	Intergenic	63.5634
3_3825837_3826149	AT3G12010	AT3G12010	3	3820352	3825765	+	5485	Intergenic	55.4833
3_3981939_3982301	FDM3	AT3G12550	3	3978005	3981881	+	3934	Intergenic	84.5717
3_4106605_4106865	AT3G12900	AT3G12900	3	4104463	4106341	+	2142	Intergenic	61.9474
3_4745030_4745384	AT3G14250	AT3G14250	3	4745926	4746958	-	1574	Intergenic	70.0275
3_4890605_4891305	AT3G14560	AT3G14560	3	4889063	4890215	+	1542	Intergenic	113.121
3_4943465_4943854	AT3G14710	AT3G14710	3	4941481	4943064	+	1984	Intergenic	59.254
3_5564845_5565674	NSP3	AT3G16390	3	5562400	5564574	+	2445	Intergenic	176.146
3_6264902_6265253	CYP77A5P	AT3G18270	3	6261733	6264361	+	3169	Intergenic	65.7181
3_6394939_6395250	AT3G18560	AT3G18560	3	6393747	6394842	+	1192	Intergenic	84.5717
3_6619967_6620328	IPT8	AT3G19160	3	6621988	6623278	-	2950	Intergenic	87.265
3_6965218_6965569	FYPP3	AT3G19980	3	6961736	6965206	+	3482	Intergenic	58.7154
3_7263557_7263817	TOP6B	AT3G20780	3	7263900	7268750	-	4933	Intergenic	53.3286
3_7386514_7386968	AT3G21080	AT3G21080	3	7388258	7390031	-	3063	Intergenic	82.9556
3_7919938_7920618	TIC	AT3G22380	3	7912905	7919707	+	7033	Intergenic	123.356
3_8473654_8473913	RFR1	AT3G23590	3	8467398	8473627	+	6256	Intergenic	44.7099
3_9058494_9058882	PRT1	AT3G24800	3	9055509	9058020	+	2985	Intergenic	85.1103
3_9408196_9408488	AOC2	AT3G25770	3	9406669	9408071	+	1527	Intergenic	61.9474
3_9421675_9421927	PP2AA2	AT3G25800	3	9422476	9426049	-	4122	Intergenic	46.8645
3_9497609_9497964	AT3G25950	AT3G25950	3	9496102	9497271	+	1507	Intergenic	63.5634
3_9572169_9572500	CYP71B19	AT3G26170	3	9573263	9575215	-	2715	Intergenic	55.4833
3_9737522_9738299	AT3G26539	AT3G26539	3	9743608	9744204	-	5905	Intergenic	112.044
3_9738866_9739424	AT3G26539	AT3G26539	3	9743608	9744204	-	4780	Intergenic	102.887
3_10187304_10187620	AT3G27510	AT3G27510	3	10188134	10190348	-	2728	Intergenic	57.638
3_10439881_10440340	AT3G28040	AT3G28040	3	10434924	10438484	+	4957	Intergenic	72.7208
3_10935760_10936129	AT3G28918	AT3G28918	3	10932966	10933058	+	2794	Intergenic	69.4888
3_16204592_16204882	AT3G44630	AT3G44630	3	16195848	16201225	+	8744	Intergenic	51.7126
3_16412484_16412746	AT3G44940	AT3G44940	3	16413334	16415319	-	2573	Intergenic	57.638
3_16509772_16510044	AT3G45110	AT3G45110	3	16508170	16508625	+	1602	Intergenic	46.3259
3_16579612_16579897	AT3G45245	AT3G45245	3	16578384	16578734	+	1228	Intergenic	54.406
3_16875891_16876298	AT3G45910	AT3G45910	3	16876338	16877075	-	777	Intergenic	87.265
3_17177979_17178248	RDUF1	AT3G46620	3	17178601	17180559	-	2311	Intergenic	46.8645
3_17204014_17204272	AT3G46710	AT3G46710	3	17206183	17209203	-	4931	Intergenic	51.7126
3_17395228_17395630	AT3G47250	AT3G47250	3	17399757	17401871	-	6241	Intergenic	69.4888
3_18595069_18595387	AT3G50150	AT3G50150	3	18595731	18597646	-	2259	Intergenic	49.5579
3_18918870_18919555	AT3G50900	AT3G50900	3	18917782	18918811	+	1088	Intergenic	117.431
3_18924793_18925097	AT3G50925	AT3G50925	3	18925658	18926083	-	986	Intergenic	60.3314
3_19438877_19439258	PUB22	AT3G52450	3	19440617	19442427	-	3169	Intergenic	80.8009
3_19700753_19701080	UGT73C7	AT3G53160	3	19702332	19703976	-	2896	Intergenic	72.1822
3_19762633_19762887	CYP71B31	AT3G53300	3	19760475	19762357	+	2158	Intergenic	53.8673
3_19949207_19949509	AT3G53860	AT3G53860	3	19949557	19951350	-	1841	Intergenic	60.87
3_20655732_20656044	AT3G55665	AT3G55665	3	20653670	20654335	+	2062	Intergenic	63.5634
3_20797519_20797782	AT3G56050	AT3G56050	3	20797871	20801428	-	3646	Intergenic	59.254
3_21695249_21695513	TRM7	AT3G58650	3	21696072	21699998	-	4485	Intergenic	62.4861
3_22077603_22077905	SAC9	AT3G59770	3	22078972	22086236	-	8331	Intergenic	56.022
3_22175325_22175647	AT3G60040	AT3G60040	3	22175852	22179728	-	4081	Intergenic	52.7899
3_22726297_22726628	AT3G61420	AT3G61420	3	22726708	22732152	-	5524	Intergenic	64.1021
3_23175415_23175699	GATL7	AT3G62660	3	23172754	23174993	+	2661	Intergenic	61.4087
3_23224839_23225114	DRB4	AT3G62800	3	23225526	23227512	-	2398	Intergenic	52.2513
3_23292051_23292354	GID1B	AT3G63010	3	23289243	23291486	+	2808	Intergenic	77.5689
4_72035_72483	YAB3	AT4G00180	4	72545	75576	-	3093	Intergenic	77.5689
4_711259_711577	ABC1	AT4G01660	4	708357	711256	+	2902	Intergenic	68.4115
4_799608_800000	AT4G01860	AT4G01860	4	801032	808087	-	8087	Intergenic	72.7208
4_924401_924655	AT4G02090	AT4G02090	4	923122	923893	+	1279	Intergenic	47.4032
4_1200288_1200648	AT4G02715	AT4G02715	4	1200670	1203380	-	2732	Intergenic	83.4943
4_1561570_1561862	ATHM2	AT4G03520	4	1562203	1564204	-	2342	Intergenic	60.3314
4_5382181_5382451	MEKK3	AT4G08470	4	5383688	5387260	-	4809	Intergenic	63.5634
4_6441301_6441553	AT4G10390	AT4G10390	4	6441596	6443554	-	2001	Intergenic	58.7154
4_6752934_6753193	MTSSB	AT4G11060	4	6754515	6756595	-	3402	Intergenic	47.9419
4_6866346_6866769	ACS6	AT4G11280	4	6863979	6866116	+	2367	Intergenic	97.4998
4_7397276_7397556	ORP2B	AT4G12460	4	7391208	7396511	+	6068	Intergenic	53.3286
4_8003879_8004295	RLP47	AT4G13810	4	8004549	8007597	-	3302	Intergenic	67.8728
4_9130837_9131355	AT4G16141	AT4G16141	4	9131532	9133161	-	1806	Intergenic	108.273
4_9443483_9443779	HB-2	AT4G16780	4	9449114	9450905	+	5335	Intergenic	56.5607
4_10071182_10071572	PUP8	AT4G18195	4	10069458	10071115	+	1724	Intergenic	70.5662
4_10288095_10288469	CIPK12	AT4G18700	4	10288798	10291058	-	2589	Intergenic	89.4197
4_10524366_10524674	CYP707A1	AT4G19230	4	10521259	10523961	+	3107	Intergenic	58.1767
4_10672567_10672898	AT4G19590	AT4G19590	4	10670589	10672554	+	1978	Intergenic	84.5717
4_11155247_11155508	AT4G20835	AT4G20835	4	11155537	11157106	-	1598	Intergenic	61.9474
4_11283922_11284186	HAP6	AT4G21150	4	11278403	11283885	+	5519	Intergenic	51.1739
4_11417177_11417461	MYB102	AT4G21440	4	11418199	11419769	-	2308	Intergenic	73.7982
4_11745006_11745268	KT2/3	AT4G22200	4	11746490	11750698	-	5430	Intergenic	54.406
4_12412037_12412340	AT4G23860	AT4G23860	4	12408950	12411678	+	3087	Intergenic	63.0247
4_12769478_12770163	AT4G24780	AT4G24780	4	12770221	12772479	-	2316	Intergenic	103.964
4_12851334_12851793	AMY1	AT4G25000	4	12851795	12853845	-	2052	Intergenic	83.4943
4_13014766_13015064	CBF2	AT4G25470	4	13015250	13016235	-	1171	Intergenic	83.4943
4_13080529_13080781	ACD1-LIKE	AT4G25650	4	13080827	13083260	-	2479	Intergenic	67.8728
4_13183761_13184029	ABCB2	AT4G25960	4	13177356	13183692	+	6405	Intergenic	51.7126
4_13502608_13502876	AT4G26860	AT4G26860	4	13503053	13504876	-	2000	Intergenic	50.6353
4_13633587_13633864	AT4G27220	AT4G27220	4	13633941	13637119	-	3255	Intergenic	43.0938
4_14183641_14184135	XIH	AT4G28710	4	14171998	14182168	+	11643	Intergenic	67.3341
4_14236440_14236997	AT4G28830	AT4G28830	4	14232422	14234334	+	4018	Intergenic	109.351
4_14551616_14551875	PAO5	AT4G29720	4	14553211	14555276	-	3401	Intergenic	52.7899
4_14631939_14632240	AT4G29920	AT4G29920	4	14632413	14636101	-	3861	Intergenic	58.7154
4_14815948_14816287	AT4G30260	AT4G30260	4	14816575	14819084	-	2797	Intergenic	63.0247
4_14870177_14870803	AT4G30410	AT4G30410	4	14870984	14872267	-	1464	Intergenic	107.196
4_15415756_15416149	AT4G31880	AT4G31880	4	15418947	15424311	-	8162	Intergenic	86.7263
4_15485817_15486415	HSL1	AT4G32010	4	15479379	15485354	+	6438	Intergenic	146.519
4_16287009_16287297	AT4G33985	AT4G33985	4	16288112	16288971	-	1674	Intergenic	51.7126
4_16534394_16534671	SSR16	AT4G34620	4	16534855	16536224	-	1553	Intergenic	54.9446
4_16567405_16567670	AVA-P1	AT4G34720	4	16567792	16569334	-	1664	Intergenic	59.7927
4_16678469_16678888	AT4G35030	AT4G35030	4	16675377	16678206	+	3092	Intergenic	66.2568
4_17086128_17086441	AT4G36105	AT4G36105	4	17083841	17085184	+	2287	Intergenic	49.5579
4_17091981_17092632	AT4G36120	AT4G36120	4	17093074	17097301	-	4669	Intergenic	109.351
4_17175943_17176261	BGAL3	AT4G36360	4	17176342	17181466	-	5205	Intergenic	50.6353
4_17582403_17582741	BRU6	AT4G37390	4	17579618	17582022	+	2785	Intergenic	64.6408
4_17588727_17589359	AT4G37409	AT4G37409	4	17590769	17592911	-	3552	Intergenic	170.221
4_17607560_17608198	SRFR1	AT4G37460	4	17608378	17615946	-	7748	Intergenic	110.967
4_17799706_17800020	AT4G37860	AT4G37860	4	17800326	17801914	-	1894	Intergenic	73.2595
5_17412_17997	AT5G01050	AT5G01050	5	18086	20887	-	2890	Intergenic	107.196
5_159351_159628	AT5G01390	AT5G01390	5	160158	162354	-	2726	Intergenic	69.4888
5_210336_210931	LECRKA4.1	AT5G01540	5	210979	213472	-	2541	Intergenic	196.077
5_340295_340784	AT5G01881	AT5G01881	5	339838	340266	+	457	Intergenic	89.4197
5_537024_537278	AT5G02460	AT5G02460	5	539249	541316	-	4038	Intergenic	56.5607
5_553366_553655	HSC70-1	AT5G02500	5	553745	556623	-	2968	Intergenic	58.1767
5_952787_953036	TRM28	AT5G03670	5	947146	950239	+	5641	Intergenic	57.0993
5_1343541_1343953	AT5G04680	AT5G04680	5	1345688	1348895	-	4942	Intergenic	72.1822
5_1415629_1415892	CPK1	AT5G04870	5	1416564	1420554	-	4662	Intergenic	50.6353
5_1610887_1611207	PYL5	AT5G05440	5	1608988	1610527	+	1899	Intergenic	84.033
5_1712152_1712418	ATE1	AT5G05700	5	1712670	1715731	-	3313	Intergenic	53.3286
5_1761900_1762212	PIRL1	AT5G05850	5	1762405	1764774	-	2562	Intergenic	77.0302
5_1900050_1900372	AT5G06260	AT5G06260	5	1902565	1905277	-	4905	Intergenic	64.1021
5_2110275_2110585	AT5G06810	AT5G06810	5	2108493	2110259	+	1782	Intergenic	64.1021
5_2143937_2144301	FLA21	AT5G06920	5	2142858	2143919	+	1079	Intergenic	64.6408
5_2482888_2483358	FH19	AT5G07780	5	2479514	2482850	+	3374	Intergenic	93.1904
5_2716437_2716983	AT5G08420	AT5G08420	5	2713347	2716328	+	3090	Intergenic	92.1131
5_3610379_3610645	YUC4	AT5G11320	5	3611247	3613640	-	2995	Intergenic	47.4032
5_3662109_3662495	AT5G11470	AT5G11470	5	3662634	3668214	-	5719	Intergenic	65.7181
5_4634840_4635110	AGP6	AT5G14380	5	4635644	4636676	-	1566	Intergenic	70.0275
5_4690642_4690941	AT5G14550	AT5G14550	5	4691006	4694055	-	3114	Intergenic	58.7154
5_5204955_5205405	AT5G15940	AT5G15940	5	5202466	5204883	+	2489	Intergenic	81.8783
5_6170586_6170859	EMB269	AT5G18570	5	6171572	6174944	-	4085	Intergenic	52.7899
5_6274755_6275145	Cpn60alpha2	AT5G18820	5	6271386	6274599	+	3369	Intergenic	82.9556
5_6401637_6401955	AT5G19100	AT5G19100	5	6408007	6409666	-	7711	Intergenic	61.9474
5_7276650_7276904	TPR7	AT5G21990	5	7273071	7276579	+	3579	Intergenic	56.5607
5_7776927_7777189	AT5G23115	AT5G23115	5	7777595	7777623	-	434	Intergenic	54.406
5_7855835_7856125	AT5G23330	AT5G23330	5	7854056	7855813	+	1779	Intergenic	52.7899
5_8220384_8220697	AT5G24210	AT5G24210	5	8217191	8219720	+	3193	Intergenic	58.1767
5_8389890_8390501	BGLU32	AT5G24550	5	8392059	8395302	-	4801	Intergenic	108.812
5_8554700_8555209	AT5G24880	AT5G24880	5	8552647	8554275	+	2053	Intergenic	98.0385
5_9662949_9663575	SFP2	AT5G27360	5	9656949	9662663	+	6000	Intergenic	131.975
5_14755484_14756229	AT5G37270	AT5G37270	5	14757933	14758559	-	2330	Intergenic	161.063
5_15630574_15630930	ABCB27	AT5G39040	5	15625460	15629835	+	5114	Intergenic	80.2623
5_16206618_16207115	AT5G40470	AT5G40470	5	16208009	16209927	-	2812	Intergenic	98.5771
5_16620884_16621138	AT5G41560	AT5G41560	5	16621197	16622757	-	1619	Intergenic	48.4806
5_17323722_17324201	AT5G43140	AT5G43140	5	17321395	17323484	+	2327	Intergenic	88.881
5_17374969_17375246	GDPD3	AT5G43300	5	17376619	17379282	-	4036	Intergenic	56.5607
5_17791156_17791471	RLT2	AT5G44180	5	17782428	17790234	+	8728	Intergenic	63.0247
5_19810394_19810662	AT5G48860	AT5G48860	5	19811651	19812865	-	2203	Intergenic	53.3286
5_19997503_19997891	MYB111	AT5G49330	5	19998823	20001572	-	3681	Intergenic	74.3369
5_20068954_20069289	AT5G49470	AT5G49470	5	20063331	20068793	+	5623	Intergenic	75.4142
5_20419058_20419725	FRO8	AT5G50160	5	20415764	20418847	+	3294	Intergenic	89.9584
5_20438415_20438876	WR3	AT5G50200	5	20436180	20437815	+	2235	Intergenic	80.2623
5_20484727_20485102	AT5G50330	AT5G50330	5	20485134	20488702	-	3600	Intergenic	100.732
5_20898884_20899157	RGF5	AT5G51451	5	20898108	20898775	+	776	Intergenic	57.638
5_21029785_21030066	AHG1	AT5G51760	5	21026805	21029188	+	2980	Intergenic	51.1739
5_21146310_21146592	BAG1	AT5G52060	5	21152011	21154395	-	7803	Intergenic	47.9419
5_21412723_21413043	WRKY27	AT5G52830	5	21410769	21412526	+	1954	Intergenic	74.3369
5_21479278_21479622	AT5G52965	AT5G52965	5	21478841	21479203	+	437	Intergenic	73.7982
5_21585489_21585750	SPCH	AT5G53210	5	21586219	21589255	-	3505	Intergenic	54.406
5_21924850_21925238	AT5G54030	AT5G54030	5	21925460	21927524	-	2286	Intergenic	71.1048
5_22113742_22114099	BBX29	AT5G54470	5	22114304	22115539	-	1440	Intergenic	76.4916
5_22226441_22227064	AT5G54710	AT5G54710	5	22227483	22230663	-	3599	Intergenic	103.964
5_22245917_22246278	AT5G54760	AT5G54760	5	22243800	22245810	+	2117	Intergenic	61.4087
5_22323271_22323927	MYB120	AT5G55020	5	22324599	22326418	-	2491	Intergenic	116.353
5_22355359_22355743	MAPKKK15	AT5G55090	5	22356852	22358413	-	2670	Intergenic	95.3451
5_22571127_22571485	SRT1	AT5G55760	5	22567222	22571008	+	3905	Intergenic	78.6463
5_22644235_22644947	OLI2	AT5G55920	5	22645448	22649517	-	4570	Intergenic	117.969
5_22793239_22793494	PEX5	AT5G56290	5	22786496	22792306	+	6743	Intergenic	48.4806
5_23154318_23154733	ATLIG4	AT5G57160	5	23154965	23161826	-	7093	Intergenic	94.2678
5_23218046_23218440	VLN5	AT5G57320	5	23211952	23218041	+	6094	Intergenic	82.9556
5_23299671_23300036	XTH12	AT5G57530	5	23300321	23301689	-	1653	Intergenic	80.8009
5_23359427_23359971	AT5G57670	AT5G57670	5	23360400	23363839	-	3868	Intergenic	100.732
5_23365185_23365467	GDU3	AT5G57685	5	23365805	23367063	-	1596	Intergenic	60.87
5_23377947_23378232	AT5G57700	AT5G57700	5	23374873	23377229	+	3074	Intergenic	70.5662
5_23379869_23380154	AT5G57700	AT5G57700	5	23374873	23377229	+	4996	Intergenic	72.7208
5_23404886_23405187	P1R1	AT5G57780	5	23405189	23406479	-	1292	Intergenic	61.9474
5_23658712_23659233	AT5G58520	AT5G58520	5	23655140	23658256	+	3572	Intergenic	121.74
5_23838632_23838945	AT5G59050	AT5G59050	5	23839108	23842958	-	4013	Intergenic	68.9501
5_23944413_23944662	AT5G59360	AT5G59360	5	23945332	23946430	-	1768	Intergenic	54.9446
5_24248197_24248637	AT5G60215	AT5G60215	5	24247622	24247956	+	575	Intergenic	119.047
5_24315386_24316245	AT5G60460	AT5G60460	5	24316833	24318241	-	1996	Intergenic	199.309
5_24410081_24410362	AT5G60710	AT5G60710	5	24410581	24415145	-	4783	Intergenic	60.3314
5_24417013_24417442	AT5G60720	AT5G60720	5	24418195	24422274	-	4832	Intergenic	84.5717
5_24610415_24610932	AACT1	AT5G61160	5	24608605	24610329	+	1810	Intergenic	73.7982
5_24818085_24818414	PPAN	AT5G61770	5	24815541	24817728	+	2544	Intergenic	61.9474
5_24921146_24921607	AT5G62030	AT5G62030	5	24918479	24920955	+	2667	Intergenic	86.1877
5_24970047_24970620	AGL42	AT5G62165	5	24964646	24968607	+	5401	Intergenic	94.8064
5_25219978_25220311	AT5G62800	AT5G62800	5	25218634	25219967	+	1344	Intergenic	75.4142
5_25996222_25997654	MAF4	AT5G65070	5	25992193	25996202	+	4029	Intergenic	245.635
5_26014754_26015035	AT5G65120	AT5G65120	5	26012775	26014739	+	1979	Intergenic	51.1739
5_26031011_26031323	PLAT3	AT5G65158	5	26030075	26031003	+	936	Intergenic	71.6435
5_26627945_26628461	UGT72E2	AT5G66690	5	26625049	26626822	+	2896	Intergenic	107.735
5_26751973_26752263	AT5G67020	AT5G67020	5	26749826	26751339	+	2147	Intergenic	63.5634
5_26786537_26786799	ICU2	AT5G67100	5	26776953	26786431	+	9584	Intergenic	51.1739
5_26807888_26808155	DEAR2	AT5G67190	5	26808876	26810116	-	1961	Intergenic	80.8009
5_26838750_26839200	AT5G67265	AT5G67265	5	26839378	26839998	-	798	Intergenic	94.8064
5_26937222_26937549	AT5G67510	AT5G67510	5	26937621	26938498	-	949	Intergenic	68.4115
Pt_8755_9592	atpA	ATCG00120	Pt	9938	11461	-	1869	Intergenic	11129.5
Pt_47639_48360	ndhJ	ATCG00420	Pt	48677	49153	-	793	Intergenic	12575.3
Pt_51652_51912	atpE	ATCG00470	Pt	52265	52663	-	751	Intergenic	5553.72
Pt_110989_111482	None	ATCG01000	Pt	109405	110436	+	1584	Intergenic	6002.97
Pt_119470_119835	ndhA	ATCG01100	Pt	119847	122009	-	2174	Intergenic	6752.8
Pt_121069_123245	rps15	ATCG01120	Pt	123296	123562	-	317	Intergenic	31998.8
1_77553_77843	AT1G01180	AT1G01180	1	75390	76845	+	2163	Intron	74.3369
1_7904953_7905205	UGT85A1	AT1G22400	1	7903660	7906969	-	1764	Intron	61.4087
1_8386756_8387009	AT1G23710	AT1G23710	1	8385188	8386522	+	1568	Intron	49.0192
1_11628942_11629191	KAN2	AT1G32240	1	11625616	11630745	-	1554	Intron	50.6353
1_19210731_19210982	AT1G51790	AT1G51790	1	19206615	19211971	-	989	Intron	58.7154
1_22519759_22520201	NAC025	AT1G61110	1	22516602	22518292	+	3157	Intron	66.2568
1_22799421_22800060	AT1G61740	AT1G61740	1	22798035	22801416	-	1356	Intron	116.892
1_23963401_23963661	AT1G64530	AT1G64530	1	23959627	23963083	+	3774	Intron	51.7126
1_24952226_24952627	AT1G66880	AT1G66880	1	24946928	24955694	+	5298	Intron	77.0302
1_28566633_28566921	AMY2	AT1G76130	1	28560629	28564159	+	6004	Intron	60.87
1_28859003_28859397	AT1G76870	AT1G76870	1	28856839	28858851	+	2164	Intron	76.4916
1_30302308_30302589	AT1G80610	AT1G80610	1	30300714	30304428	-	1839	Intron	53.8673
2_368677_369016	WOL	AT2G01830	2	362983	369707	-	691	Intron	63.0247
2_2361014_2361264	OPR3	AT2G06050	2	2359114	2362375	-	1111	Intron	41.4778
2_6894669_6894969	AT2G15830	AT2G15830	2	6893949	6894685	+	720	Intron	74.3369
2_6895462_6895722	AT2G15830	AT2G15830	2	6893949	6894685	+	1513	Intron	58.7154
2_12797736_12798033	AT2G29995	AT2G29995	2	12796503	12799441	-	1408	Intron	57.638
2_14388668_14389417	TBL37	AT2G34070	2	14387194	14390339	-	922	Intron	140.594
2_15818867_15819121	TBL15	AT2G37720	2	15818082	15821311	+	785	Intron	45.7872
2_16586870_16587244	BPM3	AT2G39760	2	16583003	16586260	+	3867	Intron	82.417
2_19557901_19558275	AT2G47720	AT2G47720	2	19556624	19557139	+	1277	Intron	77.0302
3_2430645_2430979	IBM1	AT3G07610	3	2425884	2433113	+	4761	Intron	85.1103
3_4343758_4344282	AT3G13370	AT3G13370	3	4341664	4342230	+	2094	Intron	107.196
3_8595476_8595738	SAHH2	AT3G23810	3	8587622	8589754	-	5722	Intron	60.87
3_13590314_13590875	AT3G32980	AT3G32980	3	13526071	13530098	-	60216	Intron	467.029
3_13591498_13592309	AT3G32980	AT3G32980	3	13526071	13530098	-	61400	Intron	957.76
3_19432349_19432612	PAD4	AT3G52430	3	19431095	19434450	+	1254	Intron	51.1739
3_20551052_20551321	AT3G55430	AT3G55430	3	20549423	20552215	-	894	Intron	50.6353
3_21215536_21215831	ACA11	AT3G57330	3	21211014	21216836	-	1005	Intron	47.4032
4_11271255_11271667	AAT1	AT4G21120	4	11269985	11274007	+	1270	Intron	54.9446
4_11369384_11369645	PUB8	AT4G21350	4	11356143	11357267	-	12117	Intron	58.1767
4_11864960_11865339	ORP2A	AT4G22540	4	11860409	11866475	-	1136	Intron	73.7982
4_14945664_14945999	BRS1	AT4G30610	4	14944129	14948605	+	1535	Intron	78.1076
4_15072648_15073001	AT4G30970	AT4G30970	4	15069266	15074588	-	1587	Intron	89.9584
4_16881738_16882000	DAW1	AT4G35560	4	16881336	16887083	+	402	Intron	50.6353
4_18486887_18487663	AT4G39840	AT4G39840	4	18484901	18486949	+	1986	Intron	140.055
5_987584_987835	ATCSLA09	AT5G03760	5	985622	990630	-	2795	Intron	57.638
5_3932701_3933159	CLT3	AT5G12170	5	3931349	3935142	+	1352	Intron	65.7181
5_4672352_4672623	NAC085	AT5G14490	5	4670289	4672958	-	335	Intron	53.3286
5_9245439_9245711	MSS1	AT5G26340	5	9243398	9247540	-	1829	Intron	52.7899
5_15502091_15502438	AT5G38710	AT5G38710	5	15501126	15504269	+	965	Intron	56.5607
5_23357245_23357508	COL5	AT5G57660	5	23355337	23356989	+	1908	Intron	64.1021
5_24931407_24931867	IQD23	AT5G62070	5	24929859	24932686	-	819	Intron	72.1822
Mt_162523_162852	nad4	ATMG00580	Mt	161693	169674	+	830	Intron	185.303
1_128845_129118	AT1G01320	AT1G01320	1	121067	130577	-	1459	Intronexonboundary	53.3286
1_282510_282958	AT1G01770	AT1G01770	1	278600	282891	+	3910	Intronexonboundary	87.8037
1_581907_582207	TAF13	AT1G02680	1	580625	582310	+	1282	Intronexonboundary	62.4861
1_747925_748262	AT1G03103	AT1G03103	1	747197	748057	+	728	Intronexonboundary	65.7181
1_1243177_1243525	AT1G04555	AT1G04555	1	1242506	1244244	+	671	Intronexonboundary	60.87
1_1563998_1564331	AT1G05350	AT1G05350	1	1560678	1564409	-	78	Intronexonboundary	69.4888
1_1713534_1714205	AT1G05700	AT1G05700	1	1709673	1713474	+	3861	Intronexonboundary	101.271
1_1746375_1746668	AT1G05805	AT1G05805	1	1744444	1747734	+	1931	Intronexonboundary	58.7154
1_2694043_2694388	FATB	AT1G08510	1	2691062	2694547	-	159	Intronexonboundary	84.5717
1_2753275_2753666	PPCK1	AT1G08650	1	2752124	2753809	+	1151	Intronexonboundary	103.425
1_3079507_3079886	PIF3	AT1G09530	1	3075768	3079654	+	3739	Intronexonboundary	100.732
1_3278977_3279255	AT1G10050	AT1G10050	1	3278792	3283631	+	185	Intronexonboundary	55.4833
1_3284440_3284987	BCAT-1	AT1G10060	1	3284073	3287292	+	367	Intronexonboundary	79.7236
1_3430447_3430921	PP2A-2	AT1G10430	1	3428478	3430924	-	3	Intronexonboundary	85.1103
1_4194442_4194768	AT1G12330	AT1G12330	1	4194420	4196749	+	22	Intronexonboundary	66.2568
1_4200918_4201208	KEU	AT1G12360	1	4200864	4206486	+	54	Intronexonboundary	58.7154
1_4908041_4908355	FLP	AT1G14350	1	4907887	4911168	+	154	Intronexonboundary	66.7954
1_5002115_5002397	AT1G14600	AT1G14600	1	5000986	5003637	-	1240	Intronexonboundary	66.2568
1_5395739_5396238	AT1G15680	AT1G15680	1	5393407	5394639	+	2332	Intronexonboundary	124.972
1_5807601_5807868	TPS2	AT1G16980	1	5807200	5811610	+	401	Intronexonboundary	53.8673
1_5833791_5834099	AT1G17065	AT1G17065	1	5832303	5834030	+	1488	Intronexonboundary	68.9501
1_6237459_6238076	AT1G18130	AT1G18130	1	6235895	6238799	+	1564	Intronexonboundary	98.0385
1_6812164_6812966	BEL10	AT1G19700	1	6809585	6813063	-	97	Intronexonboundary	116.353
1_6965030_6965297	SYTB	AT1G20080	1	6962030	6965443	+	3000	Intronexonboundary	48.4806
1_7789285_7789708	TGA3	AT1G22070	1	7789133	7792139	+	152	Intronexonboundary	102.887
1_7802436_7802744	AT1G22110	AT1G22110	1	7800507	7804061	-	1317	Intronexonboundary	67.8728
1_7812131_7812666	AGL104	AT1G22130	1	7812211	7814345	-	1679	Intronexonboundary	94.8064
1_7889103_7889463	AT1G22330	AT1G22330	1	7886323	7889534	+	2780	Intronexonboundary	72.1822
1_7896009_7896737	UGT85A2	AT1G22360	1	7894807	7897761	-	1024	Intronexonboundary	110.428
1_8027933_8028182	AT1G22690	AT1G22690	1	8027126	8028168	+	807	Intronexonboundary	47.4032
1_8049396_8049657	RABG3B	AT1G22740	1	8049090	8050784	+	306	Intronexonboundary	56.022
1_8352457_8352728	SRO2	AT1G23550	1	8350728	8352791	+	1729	Intronexonboundary	53.3286
1_9381645_9381959	AT1G27030	AT1G27030	1	9381527	9384060	+	118	Intronexonboundary	58.1767
1_9492873_9493135	AT1G27330	AT1G27330	1	9492849	9494382	+	24	Intronexonboundary	46.3259
1_9979304_9979744	AT1G28410	AT1G28410	1	9976182	9979793	-	49	Intronexonboundary	89.9584
1_10677071_10677422	AT1G30300	AT1G30300	1	10672973	10675455	+	4098	Intronexonboundary	63.0247
1_10925580_10925838	AT1G30780	AT1G30780	1	10923919	10926561	-	723	Intronexonboundary	47.4032
1_10975754_10976390	PUP4	AT1G30840	1	10974383	10976298	+	1371	Intronexonboundary	100.193
1_11445739_11446956	BRX	AT1G31880	1	11445490	11450232	+	249	Intronexonboundary	163.757
1_11738229_11738525	AT1G32460	AT1G32460	1	11738118	11739326	+	111	Intronexonboundary	45.2485
1_17623767_17624126	AT1G47845	AT1G47845	1	17622110	17624274	-	148	Intronexonboundary	63.0247
1_20159799_20160070	AT1G54010	AT1G54010	1	20158589	20160864	-	794	Intronexonboundary	54.9446
1_20424857_20425161	AT1G54730	AT1G54730	1	20424332	20430194	+	525	Intronexonboundary	59.7927
1_20562257_20562681	IDD7	AT1G55110	1	20560258	20563269	-	588	Intronexonboundary	77.0302
1_21468075_21468492	CAT2	AT1G58030	1	21464001	21468505	-	13	Intronexonboundary	95.3451
1_21758583_21758881	AT1G58602	AT1G58602	1	21746354	21766048	+	12229	Intronexonboundary	57.0993
1_22271664_22271929	GolS7	AT1G60450	1	22271131	22273367	-	1438	Intronexonboundary	51.1739
1_22649598_22649947	SD1-29	AT1G61380	1	22645923	22650072	-	125	Intronexonboundary	66.2568
1_22768258_22768532	AT1G61667	AT1G61667	1	22767464	22768645	+	794	Intronexonboundary	62.4861
1_23335356_23336252	AT1G62981	AT1G62981	1	23333619	23335395	+	1737	Intronexonboundary	130.359
1_23600391_23600660	EGL3	AT1G63650	1	23599413	23603164	+	978	Intronexonboundary	52.7899
1_25281807_25282122	GCS1	AT1G67490	1	25280410	25286749	-	4627	Intronexonboundary	70.5662
1_25467365_25467697	AT1G67900	AT1G67900	1	25464376	25470189	+	2989	Intronexonboundary	84.033
1_25480067_25480323	AT1G67950	AT1G67950	1	25478713	25480580	-	257	Intronexonboundary	45.7872
1_25502903_25503208	AT1G68040	AT1G68040	1	25502864	25505263	+	39	Intronexonboundary	75.4142
1_25797959_25798678	AT1G68710	AT1G68710	1	25793207	25799061	-	383	Intronexonboundary	116.892
1_25984751_25985014	AP1	AT1G69120	1	25982294	25986349	-	1335	Intronexonboundary	52.2513
1_26993516_26993788	PAB5	AT1G71770	1	26990525	26994259	-	471	Intronexonboundary	48.4806
1_28211507_28211875	AT1G75160	AT1G75160	1	28209407	28211826	+	2100	Intronexonboundary	70.5662
1_28218271_28218690	AT1G75180	AT1G75180	1	28215836	28218801	-	111	Intronexonboundary	86.1877
1_28338071_28338561	WAT1	AT1G75500	1	28337726	28340275	-	1714	Intronexonboundary	89.4197
1_28438998_28439550	AT1G75730	AT1G75730	1	28435625	28439835	-	285	Intronexonboundary	80.8009
1_28460027_28460501	AT1G75800	AT1G75800	1	28458691	28460961	+	1336	Intronexonboundary	92.6517
1_28515100_28515409	AT1G75945	AT1G75945	1	28515245	28515916	-	507	Intronexonboundary	72.7208
1_28653752_28654156	AT1G76380	AT1G76380	1	28651069	28654660	-	504	Intronexonboundary	100.193
1_28940263_28940533	SKP2B	AT1G77000	1	28940147	28942639	+	116	Intronexonboundary	49.5579
1_28962999_28963287	AT1G77093	AT1G77093	1	28962465	28963321	+	534	Intronexonboundary	61.4087
1_29697043_29697358	LUP2	AT1G78960	1	29696394	29701439	+	649	Intronexonboundary	74.8755
1_29938033_29938489	AT1G79570	AT1G79570	1	29932578	29938856	-	367	Intronexonboundary	103.425
1_29992830_29993258	WRI4	AT1G79700	1	29990336	29993766	-	508	Intronexonboundary	102.887
1_30237667_30238087	ATXRCC1	AT1G80420	1	30235164	30238535	-	448	Intronexonboundary	86.7263
1_30320411_30320938	RAE1	AT1G80670	1	30320525	30323902	-	2964	Intronexonboundary	94.2678
2_353289_353737	AT2G01818	AT2G01818	2	353344	355594	-	1857	Intronexonboundary	84.5717
2_1025786_1026122	AT2G03370	AT2G03370	2	1024643	1027132	-	1010	Intronexonboundary	60.3314
2_1861141_1861495	AT2G05160	AT2G05160	2	1858543	1862064	-	569	Intronexonboundary	59.7927
2_3377659_3378394	AT2G07638	AT2G07638	2	3377163	3378213	+	496	Intronexonboundary	257.486
2_3486421_3486744	AT2G07806	AT2G07806	2	3484627	3489670	+	1794	Intronexonboundary	180.455
2_3625735_3626301	AT2G08986	AT2G08986	2	3618058	3626460	+	7677	Intronexonboundary	133.591
2_7074259_7074625	AT2G16365	AT2G16365	2	7074119	7079519	+	140	Intronexonboundary	60.3314
2_9096833_9097204	AT2G21235	AT2G21235	2	9096527	9098767	-	1563	Intronexonboundary	57.0993
2_9260360_9260655	MEE3	AT2G21650	2	9259511	9260697	+	849	Intronexonboundary	53.8673
2_9732324_9732713	bZIP6	AT2G22850	2	9731279	9733612	-	899	Intronexonboundary	91.5744
2_10850349_10850643	EBF1	AT2G25490	2	10847375	10850797	-	154	Intronexonboundary	75.4142
2_11041373_11041813	ATCTH	AT2G25900	2	11041331	11043256	+	42	Intronexonboundary	113.66
2_11458627_11458887	NPC2	AT2G26870	2	11456926	11459481	-	594	Intronexonboundary	59.254
2_11679626_11679914	AT2G27290	AT2G27290	2	11678305	11679919	-	5	Intronexonboundary	66.7954
2_12172499_12172839	BGAL8	AT2G28470	2	12168840	12173991	-	1152	Intronexonboundary	72.1822
2_12958992_12959288	KIS	AT2G30410	2	12958116	12960768	+	876	Intronexonboundary	48.4806
2_13016248_13016579	AT2G30550	AT2G30550	2	13014530	13017329	+	1718	Intronexonboundary	79.1849
2_13676896_13677175	AT2G32200	AT2G32200	2	13676389	13677306	+	507	Intronexonboundary	51.1739
2_13718842_13719329	AT2G32295	AT2G32295	2	13718772	13722223	+	70	Intronexonboundary	95.3451
2_13741358_13741719	HDG3	AT2G32370	2	13740878	13746286	+	480	Intronexonboundary	65.1794
2_15115751_15116084	LOG2	AT2G35990	2	15112084	15116776	+	3667	Intronexonboundary	63.0247
2_15228801_15229170	AT2G36320	AT2G36320	2	15228714	15230663	+	87	Intronexonboundary	87.265
2_15753327_15753692	AT2G37540	AT2G37540	2	15751568	15754061	-	369	Intronexonboundary	72.7208
2_16023321_16023925	AT2G38255	AT2G38255	2	16022334	16024854	-	929	Intronexonboundary	102.348
2_16601968_16602247	P5CS1	AT2G39800	2	16598072	16603319	-	1072	Intronexonboundary	67.3341
2_16639524_16639910	AT2G39855	AT2G39855	2	16637661	16639497	+	1863	Intronexonboundary	93.1904
2_16726481_16726796	CLC2	AT2G40060	2	16726424	16728207	+	57	Intronexonboundary	69.4888
2_17224650_17224961	RR3	AT2G41310	2	17221840	17224880	+	2810	Intronexonboundary	68.9501
2_17272443_17273098	AT2G41440	AT2G41440	2	17271143	17274394	+	1300	Intronexonboundary	142.748
2_17504703_17505164	AT2G41930	AT2G41930	2	17501629	17502686	+	3074	Intronexonboundary	92.6517
2_17898623_17898984	NPG1	AT2G43040	2	17895883	17899556	-	572	Intronexonboundary	77.0302
2_17927266_17927565	AT2G43120	AT2G43120	2	17927181	17929138	+	85	Intronexonboundary	54.406
2_17935086_17935368	AT2G43140	AT2G43140	2	17931254	17935748	-	380	Intronexonboundary	75.9529
2_18294287_18294561	AT2G44250	AT2G44250	2	18293457	18295536	+	830	Intronexonboundary	54.406
2_18438846_18439112	AT2G44735	AT2G44735	2	18438623	18441681	+	223	Intronexonboundary	54.406
2_18922592_18923148	BRM	AT2G46020	2	18922533	18932055	+	59	Intronexonboundary	148.674
2_19237167_19237484	ZAT	AT2G46800	2	19235374	19239577	+	1793	Intronexonboundary	78.6463
2_19422017_19422492	POP1	AT2G47300	2	19418443	19422241	+	3574	Intronexonboundary	122.817
3_349290_349683	SRG3	AT3G02040	3	348167	350010	-	327	Intronexonboundary	117.969
3_426810_427142	AT3G02255	AT3G02255	3	426787	426972	+	23	Intronexonboundary	88.3424
3_595690_596050	AT3G02750	AT3G02750	3	593207	596562	-	512	Intronexonboundary	79.7236
3_658411_658705	AT3G02930	AT3G02930	3	654779	658637	+	3632	Intronexonboundary	61.9474
3_719145_719551	ARFB1C	AT3G03120	3	717143	719449	+	2002	Intronexonboundary	60.87
3_876174_876699	AT3G03620	AT3G03620	3	873749	876800	-	101	Intronexonboundary	88.881
3_1067621_1068106	APY1	AT3G04080	3	1067558	1071438	-	3332	Intronexonboundary	92.6517
3_1539773_1540025	ALY2	AT3G05380	3	1539527	1546469	+	246	Intronexonboundary	45.2485
3_1550859_1551172	AT3G05400	AT3G05400	3	1549446	1554219	+	1413	Intronexonboundary	54.406
3_1736583_1736959	AT3G05830	AT3G05830	3	1736307	1738749	+	276	Intronexonboundary	77.5689
3_2003720_2004051	MYB108	AT3G06490	3	2003393	2006727	+	327	Intronexonboundary	80.8009
3_2518783_2519210	AT3G07890	AT3G07890	3	2516271	2519545	-	335	Intronexonboundary	98.5771
3_2561046_2561819	AT3G08020	AT3G08020	3	2557437	2561848	-	29	Intronexonboundary	126.588
3_2660359_2660641	ATSIK	AT3G08760	3	2657838	2661095	-	454	Intronexonboundary	57.638
3_2891088_2891372	PLL3	AT3G09400	3	2891040	2893629	-	2257	Intronexonboundary	61.4087
3_3058530_3058884	MDHAR	AT3G09940	3	3056375	3059244	-	360	Intronexonboundary	70.5662
3_3237971_3238230	SCPL49	AT3G10410	3	3235290	3238267	-	37	Intronexonboundary	51.1739
3_3498037_3498494	AT3G11165	AT3G11165	3	3497806	3499090	-	596	Intronexonboundary	71.6435
3_3760616_3760903	UBP13	AT3G11910	3	3760724	3770563	-	9660	Intronexonboundary	73.7982
3_4319165_4319810	PA200	AT3G13330	3	4319490	4330218	-	10408	Intronexonboundary	131.436
3_4358319_4358638	AT3G13403	AT3G13403	3	4358537	4358826	-	188	Intronexonboundary	59.7927
3_4641987_4642541	NF-YA6	AT3G14020	3	4641930	4644571	+	57	Intronexonboundary	121.74
3_4671482_4671739	EXO70D3	AT3G14090	3	4669197	4671796	-	57	Intronexonboundary	59.7927
3_5539953_5540354	ABCG29	AT3G16340	3	5539385	5546487	+	568	Intronexonboundary	68.4115
3_5598053_5598353	JR1	AT3G16470	3	5595282	5599224	-	871	Intronexonboundary	59.254
3_6466103_6466404	AT3G18775	AT3G18775	3	6466331	6468015	-	1611	Intronexonboundary	63.5634
3_6485935_6486232	RAB7B	AT3G18820	3	6484068	6486264	+	1867	Intronexonboundary	62.4861
3_6594820_6595820	AT3G19070	AT3G19070	3	6593773	6594977	+	1047	Intronexonboundary	134.668
3_7227907_7228187	2023-10-04	AT3G20660	3	7225037	7228797	-	610	Intronexonboundary	59.7927
3_7464152_7464422	GLTP3	AT3G21260	3	7463834	7465975	-	1553	Intronexonboundary	67.8728
3_8153861_8154115	AT3G22970	AT3G22970	3	8152038	8154149	+	1823	Intronexonboundary	75.4142
3_8437055_8437335	AT3G23530	AT3G23530	3	8436436	8442847	+	619	Intronexonboundary	53.3286
3_8508880_8509132	HGL1	AT3G23640	3	8501556	8509649	+	7324	Intronexonboundary	45.7872
3_9781740_9782164	AT3G26610	AT3G26610	3	9776958	9780553	+	4782	Intronexonboundary	81.8783
3_9972598_9972885	AT3G27030	AT3G27030	3	9972508	9974225	-	1340	Intronexonboundary	46.3259
3_10161921_10162219	SGF29a	AT3G27460	3	10159221	10162323	-	104	Intronexonboundary	69.4888
3_10205164_10205745	AT3G27540	AT3G27540	3	10205074	10207423	+	90	Intronexonboundary	100.193
3_10458532_10458807	UMAMIT45	AT3G28100	3	10456029	10461000	+	2503	Intronexonboundary	54.406
3_10875988_10876668	ABCB19	AT3G28860	3	10870005	10877578	-	910	Intronexonboundary	106.119
3_11106213_11106467	AT3G29140	AT3G29140	3	11105746	11106144	+	467	Intronexonboundary	63.5634
3_15929269_15929549	AT3G44220	AT3G44220	3	15927939	15929839	+	1330	Intronexonboundary	50.6353
3_16734918_16735173	TET3	AT3G45600	3	16733755	16735951	-	778	Intronexonboundary	55.4833
3_19164632_19165160	AT3G51660	AT3G51660	3	19163995	19165322	-	162	Intronexonboundary	99.6545
3_19280647_19280995	AT3G51950	AT3G51950	3	19277594	19281393	-	398	Intronexonboundary	112.044
3_19989435_19989736	AT3G53990	AT3G53990	3	19989292	19991186	-	1450	Intronexonboundary	65.1794
3_20262217_20262633	AT3G54740	AT3G54740	3	20262175	20264686	+	42	Intronexonboundary	71.6435
3_20296196_20296589	BME3	AT3G54810	3	20296130	20298827	+	66	Intronexonboundary	80.8009
3_20375614_20375910	SMZ	AT3G54990	3	20373718	20376522	-	612	Intronexonboundary	75.4142
3_20557774_20558127	PBL1	AT3G55450	3	20557644	20560235	+	130	Intronexonboundary	85.1103
3_20968472_20968761	AT3G56600	AT3G56600	3	20968444	20971021	+	28	Intronexonboundary	56.5607
3_21487224_21487843	AT3G58030	AT3G58030	3	21484156	21487102	+	3068	Intronexonboundary	140.055
3_22219697_22220158	DIN2	AT3G60140	3	22216540	22220824	+	3157	Intronexonboundary	80.2623
3_22285434_22285781	AT3G60300	AT3G60300	3	22285138	22287548	+	296	Intronexonboundary	73.2595
3_22394825_22395109	AT3G60580	AT3G60580	3	22393823	22395244	+	1002	Intronexonboundary	60.87
3_22583133_22583647	AT3G61028	AT3G61028	3	22581473	22584938	-	1291	Intronexonboundary	117.969
3_22650282_22650752	BAP1	AT3G61190	3	22650159	22651636	-	884	Intronexonboundary	86.1877
3_23422575_23422950	TRM5	AT3G63430	3	23420145	23422475	+	2430	Intronexonboundary	85.649
4_300110_300366	ANL2	AT4G00730	4	299261	304612	-	4246	Intronexonboundary	50.6353
4_735966_736340	CRK	AT4G01710	4	735653	736965	+	313	Intronexonboundary	71.6435
4_1378995_1379566	RBP-DR1	AT4G03110	4	1376306	1379747	-	181	Intronexonboundary	161.602
4_1539858_1540371	AT4G03460	AT4G03460	4	1537118	1540713	-	342	Intronexonboundary	85.649
4_6920366_6920684	AT4G11380	AT4G11380	4	6919817	6925969	+	549	Intronexonboundary	60.87
4_7349293_7349909	SKU5	AT4G12420	4	7349187	7353135	-	3226	Intronexonboundary	97.4998
4_7637489_7638076	AT4G13100	AT4G13100	4	7635765	7639037	-	961	Intronexonboundary	86.1877
4_7792660_7792954	ATCSLA15	AT4G13410	4	7792016	7796041	-	3087	Intronexonboundary	50.0966
4_8687576_8687929	ABCG30	AT4G15230	4	8679754	8687519	+	7822	Intronexonboundary	61.4087
4_8985501_8986116	RALFL33	AT4G15800	4	8984787	8985995	+	714	Intronexonboundary	94.2678
4_9031916_9032270	SWEET17	AT4G15920	4	9030486	9033648	-	1378	Intronexonboundary	79.7236
4_9414636_9415090	AT4G16745	AT4G16745	4	9411823	9414897	+	2813	Intronexonboundary	81.3396
4_10073244_10073616	AT4G18203	AT4G18203	4	10072744	10073659	-	43	Intronexonboundary	69.4888
4_10355314_10355777	BEH3	AT4G18890	4	10352386	10355555	+	2928	Intronexonboundary	87.8037
4_11622897_11623181	AT4G21903	AT4G21903	4	11620889	11624459	-	1278	Intronexonboundary	50.6353
4_11755048_11755473	AT4G22214	AT4G22214	4	11754912	11756270	+	136	Intronexonboundary	99.1158
4_12568893_12569422	AT4G24231	AT4G24231	4	12568875	12569024	+	18	Intronexonboundary	136.284
4_12820525_12820816	AT4G24920	AT4G24920	4	12819164	12820968	-	152	Intronexonboundary	72.1822
4_13312629_13313027	emb1027	AT4G26300	4	13307977	13313109	-	82	Intronexonboundary	82.417
4_13376036_13376318	AT4G26480	AT4G26480	4	13372422	13376332	-	14	Intronexonboundary	62.4861
4_13554690_13554995	ATRBP45C	AT4G27000	4	13554604	13557915	-	2920	Intronexonboundary	54.406
4_13890670_13891000	AT4G27900	AT4G27900	4	13890472	13893073	+	198	Intronexonboundary	57.638
4_16781133_16781724	AT4G35270	AT4G35270	4	16777264	16782054	-	330	Intronexonboundary	109.889
4_17421597_17421951	AT4G36945	AT4G36945	4	17419918	17422130	-	179	Intronexonboundary	66.7954
4_17433680_17433934	AT4G36980	AT4G36980	4	17433601	17437217	-	3283	Intronexonboundary	72.1822
4_17958683_17958940	AT4G38350	AT4G38350	4	17958096	17966962	-	8022	Intronexonboundary	51.1739
4_18126840_18127211	SAUR15	AT4G38850	4	18126057	18126829	+	783	Intronexonboundary	79.1849
4_18151641_18152024	AT4G38930	AT4G38930	4	18149533	18151793	+	2108	Intronexonboundary	77.0302
4_18200559_18200853	AT4G39050	AT4G39050	4	18193075	18200828	+	7484	Intronexonboundary	57.0993
4_18411267_18411545	AT4G39670	AT4G39670	4	18409846	18411069	+	1421	Intronexonboundary	46.3259
4_18432755_18433057	PLAT1	AT4G39730	4	18432659	18433753	+	96	Intronexonboundary	73.2595
4_18498545_18498824	AT4G39860	AT4G39860	4	18498202	18501682	+	343	Intronexonboundary	53.3286
5_430397_430700	AT5G02170	AT5G02170	5	427642	430695	+	2755	Intronexonboundary	59.7927
5_448804_449127	AT5G02230	AT5G02230	5	448092	450737	+	712	Intronexonboundary	70.0275
5_544639_544907	DPA	AT5G02470	5	542318	544955	-	48	Intronexonboundary	68.4115
5_569352_569608	AT5G02540	AT5G02540	5	568425	570973	+	927	Intronexonboundary	60.3314
5_1203232_1203634	AT5G04310	AT5G04310	5	1202967	1207946	-	4312	Intronexonboundary	80.2623
5_1505134_1505411	AT5G05100	AT5G05100	5	1505041	1507224	-	1813	Intronexonboundary	50.6353
5_1788576_1788843	ROPGEF5	AT5G05940	5	1785845	1788600	+	2731	Intronexonboundary	52.2513
5_2733859_2734133	AT5G08460	AT5G08460	5	2733220	2735455	+	639	Intronexonboundary	44.7099
5_3161262_3161549	TPPI	AT5G10100	5	3157694	3161708	+	3568	Intronexonboundary	70.0275
5_3367998_3368266	AT5G10650	AT5G10650	5	3364928	3368439	-	173	Intronexonboundary	63.5634
5_3384234_3384599	AT5G10710	AT5G10710	5	3378956	3382958	+	5278	Intronexonboundary	89.4197
5_3410126_3410439	UBP22	AT5G10790	5	3410085	3413036	+	41	Intronexonboundary	66.2568
5_3772642_3772967	AT5G11710	AT5G11710	5	3772401	3776671	+	241	Intronexonboundary	68.9501
5_4008086_4008501	SEC10	AT5G12370	5	4002742	4008804	-	303	Intronexonboundary	111.505
5_4426128_4426432	SMT1	AT5G13710	5	4423555	4427324	-	892	Intronexonboundary	82.417
5_4529127_4529405	AT5G14030	AT5G14030	5	4526766	4529614	+	2361	Intronexonboundary	57.0993
5_5008612_5008924	AT5G15420	AT5G15420	5	5007826	5008964	-	40	Intronexonboundary	86.1877
5_5454259_5454591	TIC40	AT5G16620	5	5450620	5454577	+	3639	Intronexonboundary	72.1822
5_6467201_6467704	AT5G19230	AT5G19230	5	6467193	6468848	+	8	Intronexonboundary	96.4225
5_6601525_6601780	ASP2	AT5G19550	5	6597971	6601971	+	3554	Intronexonboundary	54.406
5_7043772_7044195	AT5G20810	AT5G20810	5	7043758	7045830	+	14	Intronexonboundary	77.0302
5_7176275_7176550	AT5G21105	AT5G21105	5	7172604	7177985	+	3671	Intronexonboundary	81.8783
5_7198598_7198999	LARP1a	AT5G21160	5	7198633	7204097	-	5098	Intronexonboundary	65.7181
5_7250118_7250496	AT5G21940	AT5G21940	5	7249014	7250770	-	274	Intronexonboundary	73.2595
5_8188280_8188690	AT5G24165	AT5G24165	5	8188166	8189470	+	114	Intronexonboundary	75.4142
5_8229356_8229641	AT5G24230	AT5G24230	5	8228829	8230964	+	527	Intronexonboundary	57.638
5_8757404_8757702	AT5G25270	AT5G25270	5	8757434	8763005	-	5303	Intronexonboundary	51.7126
5_8762557_8762859	AT5G25270	AT5G25270	5	8757434	8763005	-	146	Intronexonboundary	64.1021
5_8774940_8775284	AT5G25280	AT5G25280	5	8773734	8776594	+	1206	Intronexonboundary	80.8009
5_8799505_8800004	AT5G25360	AT5G25360	5	8799710	8802753	-	2749	Intronexonboundary	100.193
5_9682665_9682947	AT5G27410	AT5G27410	5	9676334	9682940	+	6331	Intronexonboundary	60.3314
5_9966639_9966899	AT5G27930	AT5G27930	5	9957816	9961374	-	5265	Intronexonboundary	46.3259
5_13898251_13898685	AT5G35732	AT5G35732	5	13897778	13899087	+	473	Intronexonboundary	87.265
5_16398135_16398500	AT5G40910	AT5G40910	5	16394462	16400489	+	3673	Intronexonboundary	61.9474
5_17954162_17954461	AT5G44567	AT5G44567	5	17953282	17954554	+	880	Intronexonboundary	62.4861
5_19542231_19542523	NSP5	AT5G48180	5	19540937	19542760	-	237	Intronexonboundary	68.4115
5_19623325_19623585	GLR1.3	AT5G48410	5	19620267	19623425	+	3058	Intronexonboundary	62.4861
5_19686434_19686803	AT5G48560	AT5G48560	5	19683809	19687187	+	2625	Intronexonboundary	58.7154
5_19781586_19782003	AT5G48790	AT5G48790	5	19779860	19782066	-	63	Intronexonboundary	76.4916
5_20861329_20861628	SWI1	AT5G51330	5	20858503	20861711	-	83	Intronexonboundary	49.5579
5_21291159_21291490	AT5G52450	AT5G52450	5	21288850	21291928	-	438	Intronexonboundary	72.7208
5_21673969_21674249	AT5G53420	AT5G53420	5	21673432	21675803	+	537	Intronexonboundary	71.6435
5_22287428_22287727	AT5G54860	AT5G54860	5	22284425	22287206	+	3003	Intronexonboundary	63.5634
5_22484649_22484954	XYLT	AT5G55500	5	22482125	22484631	+	2524	Intronexonboundary	56.022
5_23116948_23117316	ACA8	AT5G57110	5	23109438	23117686	-	370	Intronexonboundary	64.1021
5_23545256_23545531	ATYKT62	AT5G58180	5	23543652	23545760	+	1604	Intronexonboundary	47.4032
5_23577537_23577963	NET4A	AT5G58320	5	23577128	23579786	+	409	Intronexonboundary	72.7208
5_23584520_23585148	AT5G58340	AT5G58340	5	23582495	23585148	+	2025	Intronexonboundary	96.9611
5_23673633_23673908	AT5G58575	AT5G58575	5	23673533	23675643	+	100	Intronexonboundary	70.0275
5_23920664_23920941	UBC7	AT5G59300	5	23919868	23921193	-	252	Intronexonboundary	54.9446
5_24257293_24257633	AT5G60265	AT5G60265	5	24256375	24257699	+	918	Intronexonboundary	65.1794
5_24712572_24712912	AT5G61450	AT5G61450	5	24709862	24713010	-	98	Intronexonboundary	70.0275
5_25008894_25009344	AT5G62260	AT5G62260	5	25008843	25011666	+	51	Intronexonboundary	78.6463
5_25035364_25035826	AT5G62340	AT5G62340	5	25033471	25034404	+	1893	Intronexonboundary	111.505
5_25239527_25239820	RAC10	AT5G62880	5	25236945	25239262	+	2582	Intronexonboundary	75.4142
5_25436986_25437412	FP3	AT5G63530	5	25432890	25435834	+	4096	Intronexonboundary	97.4998
5_25489293_25489584	SPT42	AT5G63670	5	25487927	25489600	+	1366	Intronexonboundary	72.7208
5_25558786_25559079	UVR8	AT5G63860	5	25554416	25559499	-	420	Intronexonboundary	63.0247
5_25906664_25907027	CLE21	AT5G64800	5	25905956	25906713	+	708	Intronexonboundary	68.9501
5_26177414_26177959	AT5G65480	AT5G65480	5	26176021	26177917	+	1393	Intronexonboundary	111.505
5_26379279_26379594	CHY1	AT5G65940	5	26376578	26379681	-	87	Intronexonboundary	54.406
Pt_22542_23035	rpoC1	ATCG00180	Pt	20251	23084	-	49	Intronexonboundary	8560.05
Pt_70584_71004	clpP1	ATCG00670	Pt	69910	71882	-	878	Intronexonboundary	7532.8
Pt_120222_120492	ndhA	ATCG01100	Pt	119847	122009	-	1517	Intronexonboundary	5478.84
Mt_21145_21739	None	ATMG00060	Mt	20571	22086	-	347	Intronexonboundary	682.499
Mt_40760_42087	cox2	ATMG00160	Mt	40502	42628	-	541	Intronexonboundary	1219.56
Mt_346900_347181	None	ATMG01350	Mt	346757	347194	+	143	Intronexonboundary	441.712
1_49154_49444	PDH-E1 ALPHA	AT1G01090	1	47234	49304	-	140	Promoter	65.1794
1_155971_156264	UGT72B3	AT1G01420	1	154367	156178	-	86	Promoter	85.1103
1_183126_183750	AT1G01490	AT1G01490	1	180017	182749	-	377	Promoter	164.834
1_184667_185090	AT1G01500	AT1G01500	1	185033	187135	+	57	Promoter	120.663
1_237667_238018	SPPL4	AT1G01650	1	232840	237905	-	113	Promoter	78.6463
1_309328_309655	AT1G01880	AT1G01880	1	306467	309541	-	114	Promoter	56.5607
1_364073_364749	SPL8	AT1G02065	1	365165	367443	+	416	Promoter	141.132
1_468735_469104	AT1G02350	AT1G02350	1	469818	470693	+	714	Promoter	87.265
1_473392_473737	AT1G02360	AT1G02360	1	471883	473336	-	56	Promoter	84.5717
1_490713_491292	AT1G02405	AT1G02405	1	489874	490627	-	86	Promoter	204.157
1_727113_727633	SPI	AT1G03060	1	712440	727553	-	80	Promoter	115.815
1_767968_768265	FAF2	AT1G03170	1	768376	770684	+	111	Promoter	58.1767
1_785657_786096	AT1G03220	AT1G03220	1	786832	788722	+	736	Promoter	73.2595
1_798882_799270	AT1G03270	AT1G03270	1	799115	802625	+	155	Promoter	70.5662
1_835578_835883	ATG18G	AT1G03380	1	835767	841373	+	116	Promoter	66.7954
1_892375_892828	AT1G03560	AT1G03560	1	890155	892492	-	117	Promoter	115.276
1_897752_898342	AT1G03590	AT1G03590	1	894238	897718	-	34	Promoter	141.671
1_900642_900916	AT1G03610	AT1G03610	1	900732	903070	+	90	Promoter	82.9556
1_943247_943581	AT1G03760	AT1G03760	1	941062	943377	-	130	Promoter	70.5662
1_1004655_1005011	ADK1	AT1G03930	1	1004688	1008370	+	33	Promoter	77.5689
1_1023922_1024214	AT1G03982	AT1G03982	1	1022251	1023719	-	203	Promoter	66.2568
1_1073065_1073396	TPR2	AT1G04130	1	1073274	1075568	+	122	Promoter	63.0247
1_1096747_1097070	EIF2 GAMMA	AT1G04170	1	1096882	1099901	+	135	Promoter	81.3396
1_1103208_1103549	YUC9	AT1G04180	1	1104493	1106241	+	944	Promoter	71.1048
1_1108834_1109545	TPR3	AT1G04190	1	1106354	1108725	-	109	Promoter	114.199
1_1197763_1198041	AT1G04430	AT1G04430	1	1197956	1201579	+	85	Promoter	52.2513
1_1249066_1249628	AT1G04570	AT1G04570	1	1246601	1248876	-	190	Promoter	83.4943
1_1321683_1321937	PKT4	AT1G04710	1	1321885	1324840	+	52	Promoter	47.9419
1_1337813_1338469	AT1G04770	AT1G04770	1	1336274	1337849	-	36	Promoter	110.967
1_1343749_1344010	AT1G04780	AT1G04780	1	1340553	1343793	-	44	Promoter	59.254
1_1425163_1425512	PFA-DSP1	AT1G05000	1	1425539	1428869	+	27	Promoter	84.033
1_1455084_1455349	CLE20	AT1G05065	1	1454606	1455322	-	27	Promoter	56.5607
1_1468758_1469802	MAPKKK18	AT1G05100	1	1469541	1470881	+	261	Promoter	172.914
1_1482144_1482640	AT1G05140	AT1G05140	1	1482546	1484059	+	94	Promoter	81.8783
1_1494282_1494574	AT1G05170	AT1G05170	1	1490974	1494248	-	34	Promoter	50.6353
1_1504129_1504430	emb2394	AT1G05190	1	1502251	1503853	-	276	Promoter	60.3314
1_1520240_1520638	AT1G05240	AT1G05240	1	1520278	1523023	+	38	Promoter	68.4115
1_1576561_1576977	AT1G05380	AT1G05380	1	1576822	1582672	+	155	Promoter	81.8783
1_1611728_1612207	CVP2	AT1G05470	1	1607202	1611840	-	112	Promoter	88.881
1_1662177_1662595	AT1G05575	AT1G05575	1	1661550	1662259	-	82	Promoter	91.0357
1_1786822_1787109	NTH2	AT1G05900	1	1786849	1789737	+	27	Promoter	51.1739
1_1790034_1790366	AT1G05910	AT1G05910	1	1790216	1796715	+	150	Promoter	96.4225
1_1877630_1878048	AT1G06148	AT1G06148	1	1874885	1877573	-	57	Promoter	93.1904
1_1974370_1974848	AT1G06475	AT1G06475	1	1973834	1974407	-	37	Promoter	80.2623
1_2024759_2025417	AT1G06590	AT1G06590	1	2016306	2024749	-	10	Promoter	113.121
1_2082746_2083068	GAUT6	AT1G06780	1	2083311	2087141	+	243	Promoter	59.254
1_2214933_2215246	AT1G07210	AT1G07210	1	2215216	2216982	+	30	Promoter	58.1767
1_2233116_2233386	AT1G07270	AT1G07270	1	2229444	2233017	-	99	Promoter	59.7927
1_2237653_2238021	AT1G07280	AT1G07280	1	2238017	2241471	+	4	Promoter	68.9501
1_2269506_2269773	RLP1	AT1G07390	1	2269622	2274901	+	116	Promoter	54.406
1_2327291_2327549	AT1G07560	AT1G07560	1	2327315	2331148	+	24	Promoter	50.6353
1_2368531_2368851	AT1G07660	AT1G07660	1	2368833	2369735	+	18	Promoter	53.3286
1_2432672_2432956	AT1G07870	AT1G07870	1	2428773	2432091	-	581	Promoter	58.1767
1_2493131_2493380	TPST	AT1G08030	1	2489409	2493327	-	53	Promoter	57.0993
1_2534970_2535240	AT1G08110	AT1G08110	1	2535251	2537932	+	11	Promoter	54.406
1_2641792_2642236	PSAO	AT1G08380	1	2640803	2641934	-	142	Promoter	90.4971
1_2646022_2646284	AT1G08400	AT1G08400	1	2643019	2646048	-	26	Promoter	56.022
1_2702822_2703275	SIG2	AT1G08540	1	2703295	2706860	+	20	Promoter	66.2568
1_2711908_2712240	ACHT4	AT1G08570	1	2712694	2714833	+	454	Promoter	67.3341
1_2866352_2867134	ESL1	AT1G08920	1	2867203	2870745	+	69	Promoter	199.309
1_2899407_2900048	AT1G09010	AT1G09010	1	2895166	2899446	-	39	Promoter	98.0385
1_2904689_2905078	SNF4	AT1G09020	1	2899776	2904862	-	173	Promoter	77.5689
1_2910131_2910572	AT1G09040	AT1G09040	1	2911250	2915406	+	678	Promoter	64.1021
1_2925675_2926043	AT1G09060	AT1G09060	1	2921064	2925826	-	151	Promoter	70.0275
1_2988023_2988394	AT1G09245	AT1G09245	1	2986874	2987393	-	630	Promoter	73.2595
1_3019103_3019378	GolS3	AT1G09350	1	3019639	3021443	+	261	Promoter	52.2513
1_3093005_3093493	GLP5	AT1G09560	1	3093644	3094954	+	151	Promoter	109.351
1_3104211_3104613	AT1G09580	AT1G09580	1	3104492	3106366	+	121	Promoter	74.8755
1_3116712_3117037	AT1G09620	AT1G09620	1	3112778	3116699	-	13	Promoter	64.6408
1_3131133_3131457	AT1G09660	AT1G09660	1	3127762	3131094	-	39	Promoter	67.3341
1_3167855_3168139	iPGAM1	AT1G09780	1	3165370	3167924	-	69	Promoter	53.8673
1_3200395_3200865	SK41	AT1G09840	1	3195719	3200403	-	8	Promoter	74.8755
1_3242357_3242976	RAS1	AT1G09950	1	3240531	3241863	-	494	Promoter	112.044
1_3325065_3325316	AT1G10150	AT1G10150	1	3325799	3327614	+	483	Promoter	59.7927
1_3419417_3419718	AT1G10410	AT1G10410	1	3416430	3419691	-	27	Promoter	77.0302
1_3443868_3444790	ARR4	AT1G10470	1	3441988	3444360	-	430	Promoter	187.458
1_3526163_3526650	AT1G10650	AT1G10650	1	3523986	3526531	-	119	Promoter	118.508
1_3550718_3551098	AT1G10690	AT1G10690	1	3549920	3550848	-	130	Promoter	65.1794
1_3590685_3591100	SEX1	AT1G10760	1	3580830	3590928	-	172	Promoter	101.271
1_3604969_3605237	AT1G10820	AT1G10820	1	3600910	3605076	-	107	Promoter	54.406
1_3610316_3610662	TIF3H1	AT1G10840	1	3607631	3610616	-	46	Promoter	90.4971
1_3658247_3658814	SNRK2.4	AT1G10940	1	3655673	3658612	-	202	Promoter	112.583
1_3702276_3702613	AT1G11090	AT1G11090	1	3702608	3703779	+	5	Promoter	59.7927
1_3709497_3709787	AT1G11100	AT1G11100	1	3703672	3709586	-	89	Promoter	56.022
1_3732694_3733178	AT1G11160	AT1G11160	1	3733044	3739844	+	134	Promoter	69.4888
1_3745532_3745786	SCAMP2	AT1G11180	1	3745774	3748557	+	12	Promoter	64.6408
1_3765020_3765350	AT1G11230	AT1G11230	1	3763268	3764483	-	537	Promoter	61.9474
1_3809263_3809692	AT1G11330	AT1G11330	1	3809795	3813809	+	103	Promoter	82.417
1_3847004_3847274	DUF2	AT1G11420	1	3844461	3846956	-	48	Promoter	56.022
1_3905049_3905654	AT1G11608	AT1G11608	1	3905579	3906818	+	75	Promoter	96.4225
1_3909793_3910159	CYP71A18	AT1G11610	1	3906862	3909338	-	455	Promoter	78.1076
1_3993518_3994333	AT1G11820	AT1G11820	1	3991027	3993707	-	189	Promoter	135.746
1_4028306_4028762	AT1G11930	AT1G11930	1	4028595	4030656	+	167	Promoter	87.265
1_4217312_4217873	AT1G12380	AT1G12380	1	4214258	4217412	-	100	Promoter	83.4943
1_4297035_4297424	AT1G12620	AT1G12620	1	4294552	4297178	-	143	Promoter	80.2623
1_4365383_4365772	AT1G12800	AT1G12800	1	4361551	4365414	-	31	Promoter	71.6435
1_4383852_4384357	SCRM2	AT1G12860	1	4384304	4386651	+	53	Promoter	82.9556
1_4389366_4389702	NUDT12	AT1G12880	1	4389678	4391344	+	24	Promoter	61.9474
1_4439345_4439657	AT1G13000	AT1G13000	1	4436101	4439639	-	18	Promoter	56.5607
1_4447411_4447660	AT1G13030	AT1G13030	1	4444043	4447412	-	1	Promoter	57.0993
1_4466389_4467033	CYP71B7	AT1G13110	1	4467094	4469033	+	61	Promoter	97.4998
1_4473381_4473860	GLE1	AT1G13120	1	4469144	4473319	-	62	Promoter	84.5717
1_4526775_4527286	RTFL17	AT1G13245	1	4525414	4526204	-	571	Promoter	114.737
1_4621643_4622319	AT1G13470	AT1G13470	1	4620101	4621585	-	58	Promoter	101.271
1_4713184_4713732	AFP2	AT1G13740	1	4713433	4715407	+	249	Promoter	100.193
1_4776271_4776636	WRKY4	AT1G13960	1	4776283	4779420	+	12	Promoter	78.6463
1_4802306_4802957	AT1G14020	AT1G14020	1	4802720	4805375	+	237	Promoter	154.06
1_4887944_4888212	AT1G14315	AT1G14315	1	4886768	4887933	-	11	Promoter	60.3314
1_4953162_4953441	AT1G14460	AT1G14460	1	4948638	4953284	-	122	Promoter	56.5607
1_5068961_5069251	XTH28	AT1G14720	1	5066525	5068677	-	284	Promoter	75.4142
1_5077793_5078043	TTA1	AT1G14740	1	5075179	5077981	-	62	Promoter	57.0993
1_5078313_5078583	TTA1	AT1G14740	1	5075179	5077981	-	332	Promoter	53.3286
1_5186927_5187209	AT1G15060	AT1G15060	1	5183258	5187106	-	103	Promoter	56.5607
1_5323720_5324006	AT1G15490	AT1G15490	1	5320615	5323895	-	111	Promoter	53.8673
1_5324382_5324744	AT1G15490	AT1G15490	1	5320615	5323895	-	487	Promoter	63.0247
1_5397579_5398054	AVP1	AT1G15690	1	5398926	5402733	+	872	Promoter	98.5771
1_5465081_5465339	FDM1	AT1G15910	1	5465251	5469180	+	88	Promoter	47.9419
1_5562531_5563215	AT1G16270	AT1G16270	1	5562861	5568368	+	330	Promoter	107.735
1_5601523_5601810	ATCHX1	AT1G16380	1	5598411	5601367	-	156	Promoter	53.3286
1_5678593_5678934	SR45	AT1G16610	1	5675495	5678873	-	61	Promoter	86.7263
1_5767032_5767317	AT1G16860	AT1G16860	1	5767300	5770602	+	17	Promoter	51.7126
1_5862667_5862916	AT1G17145	AT1G17145	1	5860078	5862890	-	26	Promoter	74.3369
1_5875150_5875407	GSTU26	AT1G17190	1	5875295	5876620	+	112	Promoter	58.7154
1_5958195_5958702	JAZ5	AT1G17380	1	5955155	5957511	-	684	Promoter	95.3451
1_5987650_5988026	EER4	AT1G17440	1	5983984	5987934	-	92	Promoter	71.6435
1_6017241_6017896	AT1G17500	AT1G17500	1	6017808	6023503	+	88	Promoter	93.1904
1_6247700_6248032	ATMPK8	AT1G18150	1	6244298	6247830	-	130	Promoter	70.5662
1_6261597_6261883	GC2	AT1G18190	1	6257851	6261501	-	96	Promoter	60.87
1_6267252_6267895	RABA6b	AT1G18200	1	6265416	6267076	-	176	Promoter	116.892
1_6298904_6299837	NUDT4	AT1G18300	1	6299669	6301139	+	168	Promoter	138.978
1_6311265_6311609	AT1G18335	AT1G18335	1	6308925	6311373	-	108	Promoter	71.1048
1_6324567_6325232	HIK	AT1G18370	1	6319450	6324378	-	189	Promoter	130.898
1_6360098_6360566	AT1G18470	AT1G18470	1	6355695	6360344	-	222	Promoter	78.6463
1_6405382_6405766	AT1G18610	AT1G18610	1	6405607	6409532	+	159	Promoter	100.732
1_6414352_6414708	GR-RBP6	AT1G18630	1	6414609	6416459	+	99	Promoter	65.7181
1_6463443_6464104	AT1G18740	AT1G18740	1	6463849	6465476	+	255	Promoter	129.82
1_6506412_6506765	AT1G18850	AT1G18850	1	6504677	6506542	-	130	Promoter	91.5744
1_6526107_6526790	CDPK1	AT1G18890	1	6522764	6526075	-	32	Promoter	104.503
1_6528492_6528978	AT1G18900	AT1G18900	1	6528984	6532697	+	6	Promoter	70.5662
1_6545964_6546256	AT1G18950	AT1G18950	1	6546177	6552108	+	79	Promoter	59.7927
1_6565426_6565843	AT1G19010	AT1G19010	1	6565494	6567662	+	68	Promoter	72.1822
1_6594606_6594923	DMS11	AT1G19100	1	6594883	6601355	+	40	Promoter	65.7181
1_6662402_6662950	DA1	AT1G19270	1	6662417	6666032	+	15	Promoter	91.5744
1_6673505_6673775	PARVUS	AT1G19300	1	6671095	6672777	-	728	Promoter	67.3341
1_6695061_6695338	AT1G19370	AT1G19370	1	6692724	6695055	-	6	Promoter	58.1767
1_6734723_6735168	AT1G19450	AT1G19450	1	6731411	6735024	-	144	Promoter	96.9611
1_6753740_6754224	AT1G19490	AT1G19490	1	6751544	6754073	-	151	Promoter	127.127
1_6805202_6805469	AT1G19680	AT1G19680	1	6805430	6807862	+	39	Promoter	54.406
1_6904146_6904531	AT1G19880	AT1G19880	1	6900337	6904155	-	9	Promoter	72.7208
1_6970774_6971170	AT1G20100	AT1G20100	1	6969025	6971036	-	134	Promoter	73.2595
1_7004325_7004671	EMB2719	AT1G20200	1	7001087	7004432	-	107	Promoter	70.5662
1_7016392_7016693	VAB3	AT1G20260	1	7016599	7020690	+	94	Promoter	59.254
1_7128728_7128992	DPMS1	AT1G20575	1	7126747	7128762	-	34	Promoter	46.3259
1_7137976_7138259	CYCB2%3B3	AT1G20610	1	7134659	7137828	-	148	Promoter	51.1739
1_7160235_7160663	ASG5	AT1G20650	1	7157826	7160590	-	73	Promoter	82.417
1_7216862_7217185	AT1G20770	AT1G20770	1	7215010	7216897	-	35	Promoter	52.7899
1_7248199_7248584	TMT1	AT1G20840	1	7244939	7248494	-	90	Promoter	72.7208
1_7251781_7252033	XCP2	AT1G20850	1	7252111	7253747	+	78	Promoter	45.2485
1_7294807_7295066	CDKB2%3B2	AT1G20930	1	7292389	7294746	-	61	Promoter	55.4833
1_7337402_7337756	AT1G21000	AT1G21000	1	7337605	7339452	+	151	Promoter	88.881
1_7388450_7388722	IGMT1	AT1G21100	1	7386762	7388512	-	62	Promoter	70.5662
1_7470048_7470390	AT1G21326	AT1G21326	1	7468765	7469995	-	53	Promoter	73.7982
1_7508349_7508946	SCL1	AT1G21450	1	7508701	7511801	+	245	Promoter	106.119
1_7629871_7630356	AT1G21730	AT1G21730	1	7630107	7636658	+	236	Promoter	132.514
1_7662537_7662817	AT1G21830	AT1G21830	1	7660947	7662725	-	92	Promoter	67.8728
1_7692269_7692643	p24delta5	AT1G21900	1	7690802	7692459	-	184	Promoter	88.3424
1_7767715_7767978	AT1G22040	AT1G22040	1	7767924	7770216	+	54	Promoter	48.4806
1_7830570_7830999	AT1G22180	AT1G22180	1	7828326	7830424	-	146	Promoter	80.2623
1_7835665_7836242	AT1G22190	AT1G22190	1	7835781	7837411	+	116	Promoter	135.207
1_7883745_7884037	MBD8	AT1G22310	1	7881503	7883824	-	79	Promoter	57.638
1_7907295_7907564	UGT85A1	AT1G22400	1	7903660	7906969	-	326	Promoter	64.6408
1_7954248_7954606	AT1G22520	AT1G22520	1	7952974	7954546	-	60	Promoter	87.265
1_8005881_8006225	MYB3	AT1G22640	1	8006064	8007465	+	161	Promoter	75.9529
1_8015933_8016192	A/N-InvD	AT1G22650	1	8013353	8016150	-	42	Promoter	45.2485
1_8060748_8061262	GI	AT1G22770	1	8061751	8067790	+	489	Promoter	79.7236
1_8075029_8075850	AT1G22810	AT1G22810	1	8074231	8075037	-	8	Promoter	122.279
1_8117036_8117562	AT1G22930	AT1G22930	1	8117286	8122151	+	250	Promoter	97.4998
1_8138190_8138538	HIPP22	AT1G22990	1	8139114	8140233	+	576	Promoter	67.3341
1_8155562_8156750	AT1G23030	AT1G23030	1	8156504	8159185	+	246	Promoter	204.157
1_8176519_8177038	AT1G23070	AT1G23070	1	8173823	8175819	-	700	Promoter	91.0357
1_8188999_8189329	AST91	AT1G23090	1	8184925	8189234	-	95	Promoter	69.4888
1_8235001_8235477	AT1G23205	AT1G23205	1	8233953	8235019	-	18	Promoter	78.1076
1_8321500_8321755	AT1G23440	AT1G23440	1	8321611	8324497	+	111	Promoter	49.5579
1_8350607_8350885	SRO2	AT1G23550	1	8350728	8352791	+	121	Promoter	61.4087
1_8384686_8385026	AT1G23710	AT1G23710	1	8385188	8386522	+	162	Promoter	61.9474
1_8395234_8395536	BCA3	AT1G23730	1	8395466	8398387	+	70	Promoter	64.6408
1_8416250_8416731	AT1G23810	AT1G23810	1	8417495	8418566	+	764	Promoter	90.4971
1_8537712_8538513	AT1G24140	AT1G24140	1	8535999	8537780	-	68	Promoter	121.201
1_8544010_8544314	AT1G24148	AT1G24148	1	8544248	8545590	+	66	Promoter	77.0302
1_8630742_8631370	AT1G24330	AT1G24330	1	8631206	8635055	+	164	Promoter	91.5744
1_8640362_8640669	AT1G24360	AT1G24360	1	8640582	8643503	+	87	Promoter	66.7954
1_8688049_8688314	AT1G24510	AT1G24510	1	8685271	8688247	-	67	Promoter	47.4032
1_8860358_8860674	AT1G25275	AT1G25275	1	8860527	8861522	+	147	Promoter	78.6463
1_8935402_8935818	BBX15	AT1G25440	1	8933716	8935544	-	142	Promoter	70.5662
1_8975577_8976095	AT1G25550	AT1G25550	1	8976326	8978305	+	231	Promoter	107.735
1_9061176_9061662	AT1G26190	AT1G26190	1	9057095	9061140	-	36	Promoter	72.7208
1_9125447_9125729	AT1G26370	AT1G26370	1	9121443	9125578	-	131	Promoter	65.7181
1_9199646_9199899	AT1G26620	AT1G26620	1	9195512	9199671	-	25	Promoter	46.3259
1_9209752_9210028	AT1G26650	AT1G26650	1	9210051	9211588	+	23	Promoter	59.254
1_9259297_9259586	EXPA10	AT1G26770	1	9259432	9261313	+	135	Promoter	68.4115
1_9304138_9304416	AT1G26850	AT1G26850	1	9300806	9304328	-	88	Promoter	56.5607
1_9373658_9374025	AT1G27000	AT1G27000	1	9373885	9376828	+	140	Promoter	60.3314
1_9486473_9487060	HK3	AT1G27320	1	9486889	9492632	+	171	Promoter	113.121
1_9495264_9495656	LCR	AT1G27340	1	9495344	9498085	+	80	Promoter	98.0385
1_9527164_9527699	AT1G27430	AT1G27430	1	9520825	9527280	-	116	Promoter	91.0357
1_9558380_9558669	EX2	AT1G27510	1	9554710	9558461	-	81	Promoter	64.6408
1_9635574_9635831	AT1G27690	AT1G27690	1	9636588	9638901	+	757	Promoter	57.638
1_9676090_9676434	ACA1	AT1G27770	1	9671632	9676307	-	127	Promoter	72.1822
1_9739394_9739679	LTPG1	AT1G27950	1	9740508	9742159	+	829	Promoter	57.0993
1_9815481_9815935	AT1G28120	AT1G28120	1	9812930	9815560	-	79	Promoter	81.8783
1_9871994_9872426	AT1G28240	AT1G28240	1	9868257	9872278	-	148	Promoter	89.9584
1_9935208_9935598	DYL1	AT1G28330	1	9933786	9935440	-	158	Promoter	75.4142
1_10018258_10018533	AT1G28500	AT1G28500	1	10018691	10020479	+	158	Promoter	61.4087
1_10029064_10029330	VOZ1	AT1G28520	1	10029083	10031990	+	19	Promoter	49.5579
1_10094928_10095251	AT1G28815	AT1G28815	1	10095674	10096374	+	423	Promoter	52.2513
1_10111650_10111945	NUDX15	AT1G28960	1	10109500	10111738	-	88	Promoter	78.1076
1_10235966_10236235	WRKY65	AT1G29280	1	10236337	10237990	+	102	Promoter	57.0993
1_10249421_10249759	UNE1	AT1G29300	1	10247707	10249704	-	55	Promoter	82.9556
1_10261344_10261727	ERD2	AT1G29330	1	10258248	10261232	-	112	Promoter	71.1048
1_10263921_10264262	PUB17	AT1G29340	1	10264043	10266917	+	122	Promoter	75.4142
1_10294365_10294730	ML5	AT1G29400	1	10289998	10294630	-	100	Promoter	101.271
1_10381876_10382288	CAD1	AT1G29690	1	10379020	10382153	-	135	Promoter	77.5689
1_10420558_10420831	RKF1	AT1G29750	1	10413853	10420774	-	57	Promoter	56.5607
1_10422088_10422422	AT1G29760	AT1G29760	1	10422292	10424513	+	130	Promoter	52.7899
1_10477691_10477962	CAB1	AT1G29930	1	10477885	10479114	+	77	Promoter	51.1739
1_10506177_10506446	AT1G29980	AT1G29980	1	10503239	10506189	-	12	Promoter	54.9446
1_10512403_10512833	MNS3	AT1G30000	1	10509156	10512558	-	155	Promoter	69.4888
1_10548226_10548705	AT1G30070	AT1G30070	1	10546511	10548236	-	10	Promoter	83.4943
1_10553513_10553767	AT1G30080	AT1G30080	1	10550855	10553295	-	218	Promoter	50.0966
1_10581227_10581917	NUDX25	AT1G30110	1	10581735	10584152	+	182	Promoter	136.823
1_10679912_10680232	AT1G30320	AT1G30320	1	10680079	10683137	+	153	Promoter	76.4916
1_10789895_10790305	AT1G30475	AT1G30475	1	10788226	10790241	-	64	Promoter	65.1794
1_11115936_11116333	AT1G31130	AT1G31130	1	11114693	11116195	-	138	Promoter	77.0302
1_11193452_11193747	AT1G31300	AT1G31300	1	11193625	11196397	+	122	Promoter	63.0247
1_11333533_11333847	AT1G31660	AT1G31660	1	11330924	11333540	-	7	Promoter	56.022
1_11421458_11421725	PUT2	AT1G31830	1	11418589	11420961	-	497	Promoter	55.4833
1_11531647_11531927	PRK	AT1G32060	1	11532199	11534639	+	272	Promoter	60.87
1_11611826_11612212	RCD1	AT1G32230	1	11611891	11617419	+	65	Promoter	70.0275
1_11671461_11671813	AT1G32360	AT1G32360	1	11672766	11675387	+	953	Promoter	59.7927
1_11751936_11752221	ABCI7	AT1G32500	1	11749798	11752190	-	31	Promoter	73.2595
1_11763360_11763716	AT1G32530	AT1G32530	1	11759427	11762635	-	725	Promoter	57.638
1_11930977_11931488	AT1G32928	AT1G32928	1	11931149	11931801	+	172	Promoter	189.074
1_11972816_11973425	AT1G33055	AT1G33055	1	11971308	11972580	-	236	Promoter	93.7291
1_12004252_12004584	AT1G33110	AT1G33110	1	12004854	12008852	+	270	Promoter	66.7954
1_12084663_12085096	AT1G33330	AT1G33330	1	12084914	12086883	+	182	Promoter	75.9529
1_12144072_12144523	AT1G33470	AT1G33470	1	12144440	12147208	+	83	Promoter	93.7291
1_12484942_12485343	FAB1D	AT1G34260	1	12485318	12492207	+	25	Promoter	70.0275
1_12542547_12542830	AT1G34360	AT1G34360	1	12542796	12546244	+	34	Promoter	51.7126
1_12750236_12750593	APRL4	AT1G34780	1	12748571	12750506	-	87	Promoter	76.4916
1_12867002_12867367	GF14 PHI	AT1G35160	1	12867081	12868890	+	79	Promoter	93.7291
1_13039633_13039913	FBH1	AT1G35460	1	13039660	13042159	+	27	Promoter	56.022
1_13070826_13071250	AT1G35510	AT1G35510	1	13071165	13074984	+	85	Promoter	92.6517
1_13125207_13125602	CINV1	AT1G35580	1	13122082	13125328	-	121	Promoter	81.3396
1_13837012_13837325	AT1G36622	AT1G36622	1	13835620	13836954	-	58	Promoter	52.7899
1_13835427_13835804	AT1G36623	AT1G36623	1	13835832	13836121	+	28	Promoter	72.1822
1_15926000_15926256	AT1G42470	AT1G42470	1	15926676	15935529	+	420	Promoter	46.3259
1_16137303_16137812	BZIP60	AT1G42990	1	16135723	16137463	-	160	Promoter	93.7291
1_16616795_16617147	SEU	AT1G43850	1	16616988	16622049	+	159	Promoter	86.1877
1_16800112_16800487	ALDH3H1	AT1G44170	1	16796400	16800321	-	166	Promoter	80.8009
1_16838404_16838804	ILL6	AT1G44350	1	16834210	16838562	-	158	Promoter	73.7982
1_16851227_16851557	CH1	AT1G44446	1	16848308	16851271	-	44	Promoter	57.0993
1_17224578_17224850	HSFB4	AT1G46264	1	17224720	17226541	+	130	Promoter	55.4833
1_17285734_17286243	RD21A	AT1G47128	1	17282749	17285749	-	15	Promoter	108.812
1_17323384_17323711	GAMMA CA2	AT1G47260	1	17319551	17323484	-	100	Promoter	57.638
1_17334721_17334992	AT1G47280	AT1G47280	1	17331972	17334412	-	309	Promoter	51.7126
1_17356269_17356717	AT1G47340	AT1G47340	1	17353847	17356564	-	153	Promoter	96.9611
1_17432163_17432518	RBP47C'	AT1G47500	1	17432433	17435124	+	85	Promoter	69.4888
1_17456833_17457147	SEC3A	AT1G47550	1	17456987	17465195	+	154	Promoter	83.4943
1_17566373_17566653	AT1G47740	AT1G47740	1	17566511	17569297	+	138	Promoter	53.3286
1_17651556_17651821	AT1G47900	AT1G47900	1	17647144	17651791	-	30	Promoter	41.4778
1_17686842_17687118	AT1G47970	AT1G47970	1	17686990	17688859	+	128	Promoter	50.6353
1_17874226_17874483	YSL8	AT1G48370	1	17874436	17877462	+	47	Promoter	57.638
1_17960910_17961265	AT1G48580	AT1G48580	1	17957942	17960916	-	6	Promoter	75.9529
1_17976336_17976892	HON5	AT1G48620	1	17973642	17976663	-	229	Promoter	96.9611
1_17983536_17983806	PEX3	AT1G48635	1	17983646	17986292	+	110	Promoter	48.4806
1_18039983_18040370	AT1G48770	AT1G48770	1	18040129	18041447	+	146	Promoter	85.1103
1_18269315_18269714	AT1G49360	AT1G49360	1	18267231	18269465	-	150	Promoter	76.4916
1_18282722_18283041	emb1129	AT1G49400	1	18282968	18284202	+	73	Promoter	54.9446
1_18329504_18329782	AT1G49520	AT1G49520	1	18329659	18332102	+	123	Promoter	50.0966
1_18379797_18380057	CXE5	AT1G49660	1	18378634	18379901	-	104	Promoter	56.5607
1_18394738_18395013	FUT12	AT1G49710	1	18391273	18394030	-	708	Promoter	51.7126
1_18521754_18522146	AT1G50020	AT1G50020	1	18519946	18521781	-	27	Promoter	76.4916
1_18581871_18582251	SIRB	AT1G50170	1	18581998	18583832	+	127	Promoter	75.9529
1_18680913_18681254	SCL3	AT1G50420	1	18677694	18680300	-	613	Promoter	53.3286
1_18690862_18691825	AT1G50450	AT1G50450	1	18687785	18690503	-	359	Promoter	170.759
1_18693322_18693892	HKL1	AT1G50460	1	18693644	18697709	+	248	Promoter	98.0385
1_18758423_18758818	ERF3	AT1G50640	1	18756972	18758708	-	110	Promoter	92.6517
1_19162379_19162641	4CL1	AT1G51680	1	19158746	19161737	-	642	Promoter	50.6353
1_19211845_19212445	AT1G51790	AT1G51790	1	19206615	19211971	-	126	Promoter	101.271
1_19213387_19213656	IOS1	AT1G51800	1	19214072	19218053	+	416	Promoter	69.4888
1_19225794_19226194	AT1G51805	AT1G51805	1	19220236	19225797	-	3	Promoter	70.5662
1_19241985_19242557	AT1G51820	AT1G51820	1	19237219	19241965	-	20	Promoter	101.271
1_19336056_19336341	AT1G52000	AT1G52000	1	19333088	19336135	-	79	Promoter	62.4861
1_19368741_19369018	AR791	AT1G52080	1	19369089	19372121	+	71	Promoter	51.1739
1_19414632_19414947	ATHB-15	AT1G52150	1	19409688	19414764	-	132	Promoter	67.8728
1_19527568_19527843	AT1G52420	AT1G52420	1	19527822	19531443	+	21	Promoter	58.7154
1_19699038_19699292	NAC019	AT1G52890	1	19696923	19698482	-	556	Promoter	61.4087
1_19782592_19783087	SPA4	AT1G53090	1	19783185	19786902	+	98	Promoter	80.8009
1_19836894_19837462	AT1G53190	AT1G53190	1	19837110	19840370	+	216	Promoter	93.1904
1_19878701_19879114	TTL1	AT1G53300	1	19879405	19882895	+	291	Promoter	92.1131
1_19924618_19924870	AT1G53400	AT1G53400	1	19924660	19926631	+	42	Promoter	59.254
1_19956866_19957162	AT1G53460	AT1G53460	1	19954390	19956915	-	49	Promoter	67.3341
1_20014807_20015057	AT1G53625	AT1G53625	1	20014379	20015038	-	19	Promoter	62.4861
1_20019526_20019975	AT1G53635	AT1G53635	1	20019287	20019835	-	140	Promoter	77.5689
1_20164040_20164334	AT1G54020	AT1G54020	1	20161555	20163750	-	290	Promoter	50.6353
1_20186755_20187109	UBP1A	AT1G54080	1	20183545	20187096	-	13	Promoter	92.6517
1_20206694_20206979	AT1G54120	AT1G54120	1	20206930	20207555	+	49	Promoter	61.4087
1_20210232_20210584	RSH3	AT1G54130	1	20210772	20213942	+	188	Promoter	83.4943
1_20303727_20304009	AT1G54385	AT1G54385	1	20301072	20303949	-	60	Promoter	58.7154
1_20343160_20343730	AT1G54460	AT1G54460	1	20340572	20343554	-	176	Promoter	89.9584
1_20403000_20403409	ACP3	AT1G54630	1	20401357	20403166	-	166	Promoter	92.6517
1_20420846_20421244	ATG18H	AT1G54710	1	20416770	20421156	-	88	Promoter	82.9556
1_20430549_20430847	AT1G54740	AT1G54740	1	20430769	20431986	+	78	Promoter	60.87
1_20587974_20588741	PLDEPSILON	AT1G55180	1	20585008	20587723	-	251	Promoter	109.351
1_20637111_20637477	GCT	AT1G55325	1	20637333	20648434	+	144	Promoter	113.66
1_20651476_20651925	AT1G55340	AT1G55340	1	20651814	20653764	+	111	Promoter	74.8755
1_20706886_20707341	AT1G55460	AT1G55460	1	20707307	20709027	+	34	Promoter	90.4971
1_20783438_20784031	BRL1	AT1G55610	1	20779493	20784017	-	14	Promoter	104.503
1_20893160_20893436	UPL1	AT1G55860	1	20879900	20893268	-	108	Promoter	50.0966
1_20911729_20911992	SERAT2%3B1	AT1G55920	1	20912116	20913565	+	124	Promoter	49.5579
1_20938352_20938879	HAC4	AT1G55970	1	20932451	20938352	-	0	Promoter	96.9611
1_21007920_21008218	AT1G56140	AT1G56140	1	21001269	21007855	-	65	Promoter	54.9446
1_21014433_21014731	AT1G56145	AT1G56145	1	21008057	21014095	-	338	Promoter	53.8673
1_21159514_21159849	AT1G56500	AT1G56500	1	21159736	21167341	+	113	Promoter	66.2568
1_21206142_21206960	GolS2	AT1G56600	1	21207537	21209635	+	577	Promoter	125.511
1_21237616_21238023	AT1G56660	AT1G56660	1	21237839	21241014	+	184	Promoter	59.7927
1_21364688_21365026	Cand1	AT1G57680	1	21362359	21364749	-	61	Promoter	47.9419
1_21424625_21424874	AT1G57850	AT1G57850	1	21425481	21428078	+	607	Promoter	57.638
1_21462073_21462518	AT1G58025	AT1G58025	1	21457667	21462243	-	170	Promoter	79.1849
1_21507416_21507754	ATP-PRT1	AT1G58080	1	21504314	21507679	-	75	Promoter	80.8009
1_21539504_21540042	BCA6	AT1G58180	1	21537577	21540038	-	4	Promoter	92.1131
1_21553103_21553392	MSL3	AT1G58200	1	21548140	21553266	-	126	Promoter	51.1739
1_21610475_21610742	AT1G58265	AT1G58265	1	21610909	21611388	+	167	Promoter	51.1739
1_21699448_21700331	AT1G58400	AT1G58400	1	21695699	21699695	-	247	Promoter	140.055
1_21726607_21727002	RBP1	AT1G58470	1	21726963	21728802	+	39	Promoter	77.5689
1_22011137_22011447	ALA3	AT1G59820	1	22011305	22020386	+	142	Promoter	77.0302
1_22034088_22034515	PEN3	AT1G59870	1	22034423	22040126	+	92	Promoter	76.4916
1_22057149_22057787	AT1G59910	AT1G59910	1	22053863	22057268	-	119	Promoter	99.1158
1_22097610_22098083	AT1G60010	AT1G60010	1	22095285	22096620	-	990	Promoter	120.124
1_22149345_22149857	AT1G60070	AT1G60070	1	22142604	22149527	-	182	Promoter	126.049
1_22330147_22330403	AT1G60610	AT1G60610	1	22327792	22330318	-	85	Promoter	49.0192
1_22343155_22343502	AT1G60670	AT1G60670	1	22343585	22347624	+	83	Promoter	54.9446
1_22387846_22388121	NIK3	AT1G60800	1	22383393	22387766	-	80	Promoter	66.2568
1_22512089_22512403	AT1G61100	AT1G61100	1	22508524	22512333	-	70	Promoter	67.3341
1_22540730_22541050	EDA16	AT1G61140	1	22534663	22540933	-	117	Promoter	59.254
1_22548859_22549343	AT1G61170	AT1G61170	1	22549523	22550711	+	180	Promoter	74.3369
1_22712049_22712598	MLO6	AT1G61560	1	22708468	22712289	-	240	Promoter	98.0385
1_22809968_22810315	AT1G61770	AT1G61770	1	22810111	22812677	+	143	Promoter	72.7208
1_22932556_22932863	ATG8C	AT1G62040	1	22932760	22934549	+	103	Promoter	79.7236
1_22977727_22978109	2023-04-02	AT1G62180	1	22975530	22977885	-	158	Promoter	67.8728
1_23109371_23109844	CDS1	AT1G62430	1	23105905	23109534	-	163	Promoter	98.0385
1_23320214_23320585	ACS10	AT1G62960	1	23318187	23320427	-	158	Promoter	61.9474
1_23361690_23362710	NRPD1A	AT1G63020	1	23354685	23362589	-	121	Promoter	179.917
1_23392604_23392966	PP2-A11	AT1G63090	1	23390968	23392873	-	93	Promoter	65.7181
1_23610731_23611384	TRM12	AT1G63670	1	23607357	23610779	-	48	Promoter	108.273
1_23668800_23669192	UBC5	AT1G63800	1	23667592	23669145	-	47	Promoter	86.7263
1_23706109_23706823	AT1G63860	AT1G63860	1	23701408	23706058	-	51	Promoter	106.119
1_23734695_23734968	AT1G63950	AT1G63950	1	23734848	23735745	+	120	Promoter	53.8673
1_23779307_23779763	RLM1	AT1G64070	1	23779927	23783449	+	164	Promoter	79.1849
1_23801742_23802559	DAA1	AT1G64110	1	23796698	23801799	-	57	Promoter	109.889
1_23862774_23863158	AT1G64300	AT1G64300	1	23863066	23866045	+	92	Promoter	77.5689
1_23898934_23899195	AT1G64385	AT1G64385	1	23899994	23902281	+	799	Promoter	58.1767
1_23922996_23923247	AT1G64405	AT1G64405	1	23923517	23924395	+	270	Promoter	56.022
1_23945612_23945970	None	AT1G64460	1	23943484	23945810	-	160	Promoter	83.4943
1_23959260_23959729	AT1G64530	AT1G64530	1	23959627	23963083	+	102	Promoter	71.6435
1_24048632_24049005	CP5	AT1G64720	1	24046553	24048822	-	183	Promoter	70.0275
1_24097564_24098155	AT1G64850	AT1G64850	1	24096290	24097733	-	169	Promoter	137.9
1_24136192_24136656	G-TMT	AT1G64970	1	24134085	24136109	-	83	Promoter	89.4197
1_24149071_24149387	AT1G65010	AT1G65010	1	24149208	24154412	+	137	Promoter	85.1103
1_24251288_24251634	AT1G65295	AT1G65295	1	24251373	24252940	+	85	Promoter	68.9501
1_24323871_24324251	FAS1	AT1G65470	1	24319396	24324091	-	160	Promoter	76.4916
1_24348881_24349476	AT1G65486	AT1G65486	1	24349399	24350524	+	77	Promoter	106.119
1_24395339_24395716	KOR2	AT1G65610	1	24391672	24395503	-	164	Promoter	61.4087
1_24489614_24490015	PAO4	AT1G65840	1	24489758	24493077	+	144	Promoter	92.1131
1_24793064_24793435	AT1G66460	AT1G66460	1	24789735	24792163	-	901	Promoter	64.6408
1_24847638_24848223	ABO3	AT1G66600	1	24848320	24849543	+	97	Promoter	95.8838
1_24884453_24884901	LIG6	AT1G66730	1	24884681	24892046	+	220	Promoter	73.7982
1_25047431_25047710	ABA4	AT1G67080	1	25045151	25047103	-	328	Promoter	66.2568
1_25164984_25165300	AT1G67250	AT1G67250	1	25163599	25165056	-	72	Promoter	66.7954
1_25203384_25203666	AT1G67310	AT1G67310	1	25198182	25203126	-	258	Promoter	50.0966
1_25331345_25331684	AT1G67580	AT1G67580	1	25327282	25331461	-	116	Promoter	63.5634
1_25417248_25417507	AT1G67785	AT1G67785	1	25415771	25417222	-	26	Promoter	46.3259
1_25477402_25477660	ABCI17	AT1G67940	1	25477670	25478803	+	10	Promoter	61.9474
1_25514260_25514784	MAP70-1	AT1G68060	1	25510887	25514601	-	183	Promoter	87.265
1_25541657_25541912	AT1G68140	AT1G68140	1	25538924	25541823	-	89	Promoter	46.8645
1_25548734_25549425	AT1G68160	AT1G68160	1	25545758	25548894	-	160	Promoter	109.889
1_25657657_25658085	AT1G68440	AT1G68440	1	25657757	25659484	+	100	Promoter	122.279
1_25727368_25728213	CRF10	AT1G68550	1	25725455	25727701	-	333	Promoter	168.605
1_25781028_25781575	AT1G68670	AT1G68670	1	25781801	25784118	+	226	Promoter	103.964
1_25785235_25785536	AT1G68680	AT1G68680	1	25785506	25787342	+	30	Promoter	61.9474
1_25878951_25879301	RAV2	AT1G68840	1	25880155	25882222	+	854	Promoter	94.2678
1_25880044_25880504	RAV2	AT1G68840	1	25880155	25882222	+	111	Promoter	103.964
1_25914853_25915120	AT1G68920	AT1G68920	1	25914976	25918007	+	123	Promoter	54.9446
1_25941030_25941824	MGP3	AT1G68990	1	25934997	25940996	-	34	Promoter	117.969
1_25995899_25996152	AT1G69150	AT1G69150	1	25993262	25995435	-	464	Promoter	47.9419
1_26092110_26092393	AT1G69420	AT1G69420	1	26093026	26097167	+	633	Promoter	54.406
1_26125844_26126375	AT1G69510	AT1G69510	1	26126304	26128068	+	71	Promoter	72.1822
1_26171628_26172012	AT1G69580	AT1G69580	1	26171856	26174022	+	156	Promoter	85.649
1_26219696_26219982	HVA22C	AT1G69700	1	26220190	26221870	+	208	Promoter	58.7154
1_26265545_26265918	AT1G69790	AT1G69790	1	26266592	26269013	+	674	Promoter	68.9501
1_26338699_26339174	GSTU11	AT1G69930	1	26337481	26338818	-	119	Promoter	91.0357
1_26364630_26365063	AT1G70000	AT1G70000	1	26362979	26364878	-	185	Promoter	78.6463
1_26449757_26450151	TBL27	AT1G70230	1	26450166	26452039	+	15	Promoter	84.5717
1_26452358_26452784	AT1G70250	AT1G70250	1	26452847	26456305	+	63	Promoter	94.8064
1_26487480_26487800	SPDS2	AT1G70310	1	26485238	26487595	-	115	Promoter	59.254
1_26502540_26502794	ENT1	AT1G70330	1	26502909	26504619	+	115	Promoter	49.0192
1_26515521_26515913	PG2	AT1G70370	1	26512681	26515255	-	266	Promoter	80.2623
1_26544910_26545158	AT1G70430	AT1G70430	1	26545189	26549216	+	31	Promoter	55.4833
1_26587407_26587939	CRK2	AT1G70520	1	26584729	26587628	-	221	Promoter	96.4225
1_26593368_26593633	EDA24	AT1G70540	1	26593930	26594770	+	297	Promoter	63.0247
1_26719821_26720222	AT1G70860	AT1G70860	1	26718070	26719211	-	610	Promoter	80.8009
1_26781797_26782418	FAB1C	AT1G71010	1	26782048	26788973	+	251	Promoter	96.4225
1_26964074_26964448	AT1G71695	AT1G71695	1	26964087	26966688	+	13	Promoter	76.4916
1_26996637_26996905	AT1G71780	AT1G71780	1	26994977	26996673	-	36	Promoter	57.638
1_27017909_27018388	SERK1	AT1G71830	1	27018158	27022117	+	230	Promoter	82.417
1_27026405_27026741	AT1G71850	AT1G71850	1	27024731	27026363	-	42	Promoter	72.1822
1_27088234_27088618	ABCG25	AT1G71960	1	27082394	27088248	-	14	Promoter	98.5771
1_27097076_27097410	AT1G71980	AT1G71980	1	27097703	27100202	+	293	Promoter	74.8755
1_27110404_27110886	AT1G72030	AT1G72030	1	27110832	27111932	+	54	Promoter	98.5771
1_27155643_27156348	AT1G72170	AT1G72170	1	27156321	27157809	+	27	Promoter	123.356
1_27221551_27222020	PSY1R	AT1G72300	1	27217368	27221265	-	286	Promoter	90.4971
1_27257268_27258164	AT1G72410	AT1G72410	1	27251710	27257081	-	187	Promoter	159.986
1_27276063_27276609	JAZ6	AT1G72450	1	27273968	27276562	-	47	Promoter	130.359
1_27302230_27302630	AT1G72510	AT1G72510	1	27303323	27304927	+	693	Promoter	73.2595
1_27308047_27308347	LOX4	AT1G72520	1	27308513	27312756	+	166	Promoter	58.1767
1_27329696_27330115	PSD	AT1G72560	1	27324367	27330031	-	84	Promoter	88.881
1_27382853_27383193	AT1G72740	AT1G72740	1	27380260	27382924	-	71	Promoter	63.0247
1_27389750_27390162	HAB1	AT1G72770	1	27389948	27393327	+	198	Promoter	93.1904
1_27421488_27421800	AT1G72860	AT1G72860	1	27416228	27420946	-	542	Promoter	60.87
1_27427106_27428068	AT1G72880	AT1G72880	1	27423385	27426215	-	891	Promoter	154.599
1_27572110_27572702	AT1G73340	AT1G73340	1	27573114	27575273	+	412	Promoter	103.425
1_27595862_27596158	AT1G73390	AT1G73390	1	27590810	27595752	-	110	Promoter	64.6408
1_27699092_27700011	MPK15	AT1G73670	1	27699871	27703449	+	140	Promoter	125.511
1_27714341_27714728	CDKD1%3B1	AT1G73690	1	27714910	27717420	+	182	Promoter	79.1849
1_27732421_27732761	EIL3	AT1G73730	1	27730031	27732683	-	78	Promoter	94.2678
1_27786497_27786843	AT1G73885	AT1G73885	1	27786864	27787708	+	21	Promoter	62.4861
1_27814520_27815292	TAF2	AT1G73960	1	27804879	27814519	-	1	Promoter	142.21
1_27854050_27854341	AT1G74070	AT1G74070	1	27851460	27853269	-	781	Promoter	63.0247
1_27865725_27866218	SOT16	AT1G74100	1	27864345	27865694	-	31	Promoter	79.1849
1_27876690_27876964	AT1G74140	AT1G74140	1	27876905	27879780	+	59	Promoter	59.7927
1_27990511_27991011	AT1G74470	AT1G74470	1	27991165	27993445	+	154	Promoter	94.8064
1_28020200_28020451	AT1G74580	AT1G74580	1	28020548	28023905	+	97	Promoter	48.4806
1_28085570_28085895	AT1G74750	AT1G74750	1	28085753	28089642	+	142	Promoter	64.1021
1_28098455_28098818	AT1G74790	AT1G74790	1	28098464	28101896	+	9	Promoter	60.3314
1_28105023_28105426	AT1G74800	AT1G74800	1	28101762	28105193	-	170	Promoter	59.7927
1_28232753_28233148	ERDL6	AT1G75220	1	28229026	28233134	-	14	Promoter	82.9556
1_28233897_28234217	AT1G75230	AT1G75230	1	28234086	28237290	+	131	Promoter	62.4861
1_28260610_28260926	AUL1	AT1G75310	1	28260801	28266323	+	125	Promoter	57.0993
1_28284941_28285393	BBD1	AT1G75380	1	28281195	28284168	-	773	Promoter	71.6435
1_28296319_28296648	AT1G75400	AT1G75400	1	28296886	28299768	+	238	Promoter	72.7208
1_28302668_28303083	BLH3	AT1G75410	1	28299786	28302728	-	60	Promoter	86.7263
1_28400411_28400690	AVA-P4	AT1G75630	1	28400439	28402355	+	28	Promoter	64.1021
1_28419692_28420088	GH9B7	AT1G75680	1	28417052	28419635	-	57	Promoter	67.8728
1_28492497_28492916	AT1G75890	AT1G75890	1	28492944	28495246	+	28	Promoter	70.5662
1_28497836_28498155	AT1G75900	AT1G75900	1	28498821	28501254	+	666	Promoter	61.4087
1_28557254_28557664	AT1G76110	AT1G76110	1	28555034	28557615	-	49	Promoter	106.657
1_28630639_28631073	CYCB2%3B4	AT1G76310	1	28627694	28630789	-	150	Promoter	69.4888
1_28638437_28638922	AT1G76350	AT1G76350	1	28639453	28643086	+	531	Promoter	147.596
1_28639245_28639811	AT1G76350	AT1G76350	1	28639453	28643086	+	208	Promoter	122.817
1_28655078_28655379	PUB43	AT1G76390	1	28655208	28658711	+	130	Promoter	65.1794
1_28727065_28727571	AT1G76550	AT1G76550	1	28722657	28727111	-	46	Promoter	81.8783
1_28727848_28728243	CP12-3	AT1G76560	1	28728206	28728976	+	37	Promoter	86.1877
1_28771319_28771922	AT1G76660	AT1G76660	1	28768759	28771538	-	219	Promoter	119.047
1_28823714_28824099	IGMT5	AT1G76790	1	28822186	28823727	-	13	Promoter	72.1822
1_28916011_28916293	IDL5	AT1G76952	1	28914446	28915102	-	909	Promoter	60.87
1_28955397_28955690	MAF1	AT1G77080	1	28955483	28960234	+	86	Promoter	91.0357
1_29015786_29016130	AT1G77230	AT1G77230	1	29016120	29019768	+	10	Promoter	82.9556
1_29035612_29035893	AT1G77280	AT1G77280	1	29030998	29034822	-	790	Promoter	60.3314
1_29038108_29038569	AT1G77290	AT1G77290	1	29038366	29040217	+	203	Promoter	129.282
1_29048923_29049571	EFS	AT1G77300	1	29039922	29049454	-	117	Promoter	120.663
1_29073534_29073813	AT1G77370	AT1G77370	1	29073840	29074893	+	27	Promoter	45.2485
1_29162329_29162673	AT1G77600	AT1G77600	1	29152642	29162448	-	119	Promoter	67.8728
1_29164659_29164955	AT1G77610	AT1G77610	1	29165170	29167773	+	215	Promoter	61.9474
1_29240212_29240599	NIA1	AT1G77760	1	29235721	29239484	-	728	Promoter	78.1076
1_29253165_29253488	AT1G77800	AT1G77800	1	29253332	29260617	+	156	Promoter	68.9501
1_29287174_29287422	AT1G77880	AT1G77880	1	29285902	29287190	-	16	Promoter	57.0993
1_29297295_29297546	TGA7	AT1G77920	1	29298243	29300945	+	697	Promoter	63.0247
1_29327474_29327846	SULTR1%3B2	AT1G78000	1	29327515	29333220	+	41	Promoter	82.417
1_29353500_29354252	AT1G78060	AT1G78060	1	29349679	29352946	-	554	Promoter	123.356
1_29436671_29437097	TSD2	AT1G78240	1	29432829	29436674	-	3	Promoter	85.1103
1_29452311_29452564	AT1G78280	AT1G78280	1	29452555	29457373	+	9	Promoter	52.2513
1_29520782_29521097	AT1G78470	AT1G78470	1	29521770	29523191	+	673	Promoter	54.9446
1_29566495_29567007	LZF1	AT1G78600	1	29566863	29568931	+	144	Promoter	77.5689
1_29585383_29585736	GGH1	AT1G78660	1	29585677	29588389	+	59	Promoter	59.7927
1_29641195_29641582	AT1G78840	AT1G78840	1	29639290	29641018	-	177	Promoter	77.0302
1_29655747_29656576	AT1G78890	AT1G78890	1	29656430	29658634	+	146	Promoter	164.295
1_29842325_29842697	MC4	AT1G79340	1	29842587	29844638	+	110	Promoter	73.7982
1_29887423_29887683	ALDH5F1	AT1G79440	1	29882121	29887414	-	9	Promoter	42.5552
1_29896887_29897281	AT1G79470	AT1G79470	1	29894569	29897166	-	115	Promoter	69.4888
1_29909473_29910152	AT1G79510	AT1G79510	1	29908013	29909988	-	164	Promoter	161.063
1_29919413_29919714	GAPCP-1	AT1G79530	1	29915902	29919408	-	5	Promoter	88.881
1_29999005_29999555	AT1G79720	AT1G79720	1	29997127	29999045	-	40	Promoter	82.9556
1_30033707_30034094	GC5	AT1G79830	1	30027569	30033907	-	187	Promoter	66.7954
1_30044662_30044946	AT1G79870	AT1G79870	1	30044746	30046148	+	84	Promoter	59.254
1_30062726_30063143	Hsp70-15	AT1G79920	1	30059302	30062824	-	98	Promoter	121.201
1_30081783_30082148	AT1G79970	AT1G79970	1	30082077	30083894	+	71	Promoter	88.881
1_30117578_30118059	AT1G80060	AT1G80060	1	30114449	30117645	-	67	Promoter	119.047
1_30157687_30157964	AT1G80180	AT1G80180	1	30156682	30157808	-	121	Promoter	66.7954
1_30173268_30173909	DGR1	AT1G80240	1	30171357	30173109	-	159	Promoter	96.4225
1_30190791_30191098	NTT1	AT1G80300	1	30191538	30194605	+	440	Promoter	75.9529
1_30191403_30191696	NTT1	AT1G80300	1	30191538	30194605	+	135	Promoter	70.5662
1_30250255_30250560	NHO1	AT1G80460	1	30246683	30249337	-	918	Promoter	51.7126
1_30266919_30267579	TPR1	AT1G80490	1	30260818	30267125	-	206	Promoter	115.276
1_30280554_30281695	AT1G80530	AT1G80530	1	30277909	30280359	-	195	Promoter	240.248
1_30331102_30331743	AT1G80700	AT1G80700	1	30331842	30333400	+	99	Promoter	101.809
1_30369741_30370173	CCR2	AT1G80820	1	30370474	30372799	+	301	Promoter	68.9501
1_30375752_30376557	NRAMP1	AT1G80830	1	30372668	30376072	-	320	Promoter	254.254
1_30389257_30389680	AT1G80865	AT1G80865	1	30389538	30390557	+	142	Promoter	130.359
1_30404529_30404978	J8	AT1G80920	1	30403503	30404713	-	184	Promoter	67.8728
1_30410474_30410797	AT1G80940	AT1G80940	1	30410585	30412289	+	111	Promoter	60.3314
2_9731_10366	AT2G01023	AT2G01023	2	9648	9767	-	36	Promoter	5447.06
2_109306_109805	PAP1	AT2G01180	2	106621	108829	-	477	Promoter	90.4971
2_114775_115040	PDE331	AT2G01190	2	114926	117750	+	114	Promoter	57.638
2_286399_286869	PUX2	AT2G01650	2	284509	286529	-	130	Promoter	88.3424
2_361440_361799	AT2G01820	AT2G01820	2	357353	360924	-	516	Promoter	59.7927
2_409692_410232	CYCJ18	AT2G01905	2	410321	416000	+	89	Promoter	95.8838
2_477524_478261	GAD4	AT2G02010	2	474108	476997	-	527	Promoter	109.889
2_504697_504975	IDD5	AT2G02070	2	505375	510781	+	400	Promoter	55.4833
2_560531_560905	TOM3	AT2G02180	2	560695	563367	+	164	Promoter	77.5689
2_587339_588070	PSKR1	AT2G02220	2	583797	587401	-	62	Promoter	101.271
2_620781_621098	PP2-B10	AT2G02360	2	619323	620793	-	12	Promoter	57.0993
2_632383_632736	AT2G02400	AT2G02400	2	631140	632637	-	99	Promoter	87.265
2_652198_652714	AL6	AT2G02470	2	652564	654985	+	150	Promoter	78.6463
2_660299_660642	STI	AT2G02480	2	660655	665635	+	13	Promoter	61.4087
2_768687_768978	WHY3	AT2G02740	2	769334	771235	+	356	Promoter	50.6353
2_918576_918830	EXPA15	AT2G03090	2	916806	918671	-	95	Promoter	49.0192
2_940378_940663	AT2G03130	AT2G03130	2	940607	941076	+	56	Promoter	65.1794
2_941667_942008	AT2G03140	AT2G03140	2	941829	951553	+	162	Promoter	73.7982
2_1028039_1028314	AT2G03380	AT2G03380	2	1028228	1030361	+	86	Promoter	44.1712
2_1106727_1107070	AT2G03640	AT2G03640	2	1104307	1106905	-	165	Promoter	60.87
2_1160857_1161346	AT2G03810	AT2G03810	2	1160947	1164657	+	90	Promoter	91.0357
2_1531032_1531302	AT2G04400	AT2G04400	2	1531148	1533737	+	116	Promoter	55.4833
2_1587977_1588362	IBR5	AT2G04550	2	1588193	1590166	+	169	Promoter	71.6435
2_1682586_1683012	AT2G04795	AT2G04795	2	1682856	1683614	+	156	Promoter	89.4197
2_2180328_2180967	AT2G05760	AT2G05760	2	2180755	2183904	+	212	Promoter	134.668
2_2198028_2198597	AT2G05786	AT2G05786	2	2198271	2198405	-	192	Promoter	113.121
2_3313106_3315150	AT2G07629	AT2G07629	2	3312873	3313502	-	396	Promoter	916.283
2_5636767_5637078	ABH1	AT2G13540	2	5636884	5643066	+	117	Promoter	76.4916
2_5649805_5650135	AT2G13550	AT2G13550	2	5648329	5649847	-	42	Promoter	71.6435
2_5693051_5693614	AT2G13660	AT2G13660	2	5692097	5693016	-	35	Promoter	99.1158
2_6033908_6034386	AT2G14247	AT2G14247	2	6034282	6035375	+	104	Promoter	83.4943
2_6313375_6313974	APK	AT2G14750	2	6313883	6316047	+	91	Promoter	86.7263
2_6366790_6367067	AT2G14835	AT2G14835	2	6366879	6371126	+	89	Promoter	60.3314
2_6744764_6745085	AT2G15440	AT2G15440	2	6743528	6744835	-	71	Promoter	65.7181
2_6849129_6849416	AT2G15730	AT2G15730	2	6849452	6852214	+	36	Promoter	47.9419
2_6866962_6867465	AT2G15760	AT2G15760	2	6865610	6867004	-	42	Promoter	84.5717
2_6893527_6893971	AT2G15830	AT2G15830	2	6893949	6894685	+	22	Promoter	76.4916
2_6926985_6927237	AT2G15900	AT2G15900	2	6927024	6932791	+	39	Promoter	54.406
2_6946725_6947367	AT2G15960	AT2G15960	2	6947096	6947866	+	271	Promoter	90.4971
2_7104144_7104604	BLH7	AT2G16400	2	7101269	7103928	-	216	Promoter	73.7982
2_7122865_7123296	PAP10	AT2G16430	2	7120372	7123079	-	214	Promoter	93.1904
2_7145277_7145544	NERD	AT2G16485	2	7136845	7145424	-	120	Promoter	59.7927
2_7182215_7182564	ASE1	AT2G16570	2	7180142	7182287	-	72	Promoter	58.7154
2_7339222_7339631	UBC23	AT2G16920	2	7334226	7339350	-	128	Promoter	74.8755
2_7353701_7353980	TRN1	AT2G16950	2	7353773	7361256	+	72	Promoter	68.4115
2_7406411_7406705	NAC036	AT2G17040	2	7406911	7408393	+	206	Promoter	51.1739
2_7552783_7553041	AP19	AT2G17380	2	7552992	7555163	+	49	Promoter	42.5552
2_7606294_7606621	AT2G17500	AT2G17500	2	7606728	7609278	+	107	Promoter	52.2513
2_7643475_7644083	cPT1	AT2G17570	2	7643925	7646274	+	158	Promoter	146.519
2_7712989_7713422	AT2G17760	AT2G17760	2	7713234	7716505	+	188	Promoter	68.9501
2_7753784_7754175	AT2G17830	AT2G17830	2	7754048	7755604	+	127	Promoter	85.1103
2_7863940_7864309	AT2G18090	AT2G18090	2	7864175	7867820	+	134	Promoter	78.6463
2_7898781_7899625	bZIP2	AT2G18160	2	7898012	7899242	-	383	Promoter	127.127
2_7934409_7935133	PPa2	AT2G18230	2	7931923	7934353	-	56	Promoter	108.273
2_7972304_7972563	ZHD6	AT2G18350	2	7971017	7972396	-	92	Promoter	50.6353
2_8074895_8075151	AT2G18600	AT2G18600	2	8073167	8075009	-	114	Promoter	42.0165
2_8122902_8123231	AT2G18740	AT2G18740	2	8123195	8125078	+	36	Promoter	73.7982
2_8138831_8139127	PHYB	AT2G18790	2	8139756	8144461	+	629	Promoter	51.1739
2_8139593_8139991	PHYB	AT2G18790	2	8139756	8144461	+	163	Promoter	83.4943
2_8194206_8194723	AT2G18910	AT2G18910	2	8192702	8194396	-	190	Promoter	123.895
2_8308893_8309198	AT2G19160	AT2G19160	2	8309533	8314008	+	335	Promoter	56.022
2_8330338_8330671	FRK1	AT2G19190	2	8326049	8329944	-	394	Promoter	63.0247
2_8425979_8426249	TAG1	AT2G19450	2	8426117	8429853	+	132	Promoter	54.9446
2_8430558_8430906	AT2G19460	AT2G19460	2	8431363	8432269	+	457	Promoter	88.881
2_8534334_8535002	MIOX2	AT2G19800	2	8530865	8533779	-	555	Promoter	115.276
2_8570161_8570796	HXK2	AT2G19860	2	8570607	8574067	+	189	Promoter	84.033
2_8643972_8644379	CAF1	AT2G20020	2	8644369	8647291	+	10	Promoter	73.7982
2_8760162_8760444	ALE2	AT2G20300	2	8755852	8760298	-	136	Promoter	55.4833
2_8880191_8880472	SUR1	AT2G20610	2	8877887	8880440	-	32	Promoter	60.87
2_8899871_8900169	PIA1	AT2G20630	2	8896912	8899898	-	27	Promoter	51.7126
2_8913367_8913826	AT2G20670	AT2G20670	2	8911860	8913747	-	79	Promoter	107.196
2_8998330_8998875	AT2G20920	AT2G20920	2	8998450	9000073	+	120	Promoter	100.193
2_9006116_9006681	pEARLI4	AT2G20960	2	9006610	9009794	+	71	Promoter	92.6517
2_9014074_9014629	MCM10	AT2G20980	2	9011344	9013963	-	111	Promoter	75.4142
2_9038132_9038447	GRP2B	AT2G21060	2	9036766	9037782	-	350	Promoter	59.254
2_9080431_9080925	AT2G21190	AT2G21190	2	9080760	9083009	+	165	Promoter	86.1877
2_9120024_9120890	AT2G21300	AT2G21300	2	9114032	9119977	-	47	Promoter	157.831
2_9141364_9141630	AT2G21380	AT2G21380	2	9141465	9149330	+	101	Promoter	47.9419
2_9214843_9215178	AT2G21520	AT2G21520	2	9215519	9219236	+	341	Promoter	63.5634
2_9266416_9266743	GRP7	AT2G21660	2	9265084	9266557	-	141	Promoter	66.7954
2_9376284_9376572	LST8-2	AT2G22040	2	9374438	9376260	-	24	Promoter	50.0966
2_9393551_9393938	AT2G22100	AT2G22100	2	9391554	9393594	-	43	Promoter	107.196
2_9494589_9494889	AT2G22340	AT2G22340	2	9492864	9494112	-	477	Promoter	70.0275
2_9656323_9656606	AT2G22720	AT2G22720	2	9657339	9660803	+	733	Promoter	73.2595
2_9660564_9660836	AT2G22730	AT2G22730	2	9660858	9664133	+	22	Promoter	52.7899
2_9706261_9706750	HAT9	AT2G22800	2	9704632	9706217	-	44	Promoter	91.5744
2_9743285_9743635	AT2G22890	AT2G22890	2	9742224	9743467	-	168	Promoter	79.7236
2_9830483_9830734	AT2G23090	AT2G23090	2	9829450	9830434	-	49	Promoter	54.406
2_9831785_9832111	AT2G23093	AT2G23093	2	9832032	9834739	+	79	Promoter	74.8755
2_9843979_9844262	AGP17	AT2G23130	2	9844134	9845385	+	128	Promoter	67.3341
2_9849205_9849514	PUB4	AT2G23140	2	9845410	9849379	-	135	Promoter	72.7208
2_10113299_10113750	BLH4	AT2G23760	2	10107707	10113327	-	28	Promoter	115.276
2_10127397_10127653	AT2G23790	AT2G23790	2	10125367	10127589	-	64	Promoter	60.3314
2_10366894_10367291	AT2G24360	AT2G24360	2	10364451	10366902	-	8	Promoter	70.5662
2_10379827_10380132	AT2G24420	AT2G24420	2	10379948	10383405	+	121	Promoter	72.7208
2_10387280_10387576	NAC038	AT2G24430	2	10383497	10386625	-	655	Promoter	43.6325
2_10439444_10439784	WRKY17	AT2G24570	2	10437353	10439469	-	25	Promoter	79.1849
2_10440223_10440853	WRKY17	AT2G24570	2	10437353	10439469	-	754	Promoter	137.362
2_10448838_10449091	RSZ22a	AT2G24590	2	10449631	10451184	+	540	Promoter	49.0192
2_10505368_10505754	AT2G24693	AT2G24693	2	10506024	10506859	+	270	Promoter	73.7982
2_10788021_10788340	AT2G25320	AT2G25320	2	10781622	10788235	-	105	Promoter	61.9474
2_10842719_10843034	AT2G25480	AT2G25480	2	10842863	10845833	+	144	Promoter	88.3424
2_10880544_10880931	AT2G25560	AT2G25560	2	10880552	10883939	+	8	Promoter	78.6463
2_10956051_10956347	AT2G25720	AT2G25720	2	10955430	10956090	-	39	Promoter	56.022
2_10972802_10973163	AT2G25730	AT2G25730	2	10956263	10972951	-	149	Promoter	96.4225
2_11139932_11140348	CYP711A1	AT2G26170	2	11140809	11143360	+	461	Promoter	70.0275
2_11262538_11262832	AT2G26470	AT2G26470	2	11259142	11262586	-	48	Promoter	53.3286
2_11284012_11284290	AR781	AT2G26530	2	11282663	11284272	-	18	Promoter	52.7899
2_11296896_11297161	PLA2A	AT2G26560	2	11293702	11295918	-	978	Promoter	59.7927
2_11316327_11316843	AT2G26600	AT2G26600	2	11316346	11318520	+	19	Promoter	75.4142
2_11329625_11329895	KCS11	AT2G26640	2	11329719	11331858	+	94	Promoter	45.2485
2_11336335_11336922	KT1	AT2G26650	2	11331850	11336738	-	184	Promoter	144.364
2_11380301_11380664	BAS1	AT2G26710	2	11380463	11383821	+	162	Promoter	75.9529
2_11408547_11408983	SCAB1	AT2G26770	2	11403979	11408421	-	126	Promoter	70.5662
2_11432727_11432980	AT2G26800	AT2G26800	2	11429019	11432797	-	70	Promoter	47.4032
2_11488802_11489153	AT2G26920	AT2G26920	2	11488988	11491751	+	165	Promoter	86.1877
2_11494128_11494434	CDPMEK	AT2G26930	2	11491707	11494290	-	144	Promoter	71.1048
2_11518565_11519014	CIPK3	AT2G26980	2	11514600	11518734	-	169	Promoter	83.4943
2_11601151_11601700	AAO3	AT2G27150	2	11601727	11608450	+	27	Promoter	88.881
2_11704035_11704350	OTLD1	AT2G27350	2	11699548	11704303	-	47	Promoter	66.7954
2_11728233_11728813	AT2G27420	AT2G27420	2	11726134	11727654	-	579	Promoter	82.417
2_11753896_11754407	AT2G27500	AT2G27500	2	11752064	11754066	-	170	Promoter	108.273
2_11807069_11807410	AT2G27680	AT2G27680	2	11803743	11806087	-	982	Promoter	70.0275
2_11851614_11852270	AT2G27800	AT2G27800	2	11849647	11851457	-	157	Promoter	126.049
2_11866781_11867210	AXS1	AT2G27860	2	11864277	11866998	-	212	Promoter	82.417
2_12160453_12160870	AT2G28430	AT2G28430	2	12159548	12160466	-	13	Promoter	77.0302
2_12228511_12228820	RAP2.7	AT2G28550	2	12225656	12228624	-	113	Promoter	64.6408
2_12330301_12330569	HIS4	AT2G28740	2	12329345	12330059	-	242	Promoter	64.1021
2_12370683_12371030	PUB12	AT2G28830	2	12368220	12370420	-	263	Promoter	88.3424
2_12377936_12378327	XBAT31	AT2G28840	2	12378272	12380809	+	55	Promoter	115.276
2_12408237_12408600	PLL4	AT2G28890	2	12405391	12408239	-	2	Promoter	99.1158
2_12424098_12424354	PK1B	AT2G28930	2	12424303	12426674	+	51	Promoter	65.7181
2_12622035_12622296	GSTU6	AT2G29440	2	12619630	12621231	-	804	Promoter	55.4833
2_12634230_12634595	AT2G29500	AT2G29500	2	12633065	12634120	-	110	Promoter	87.265
2_12752970_12753312	AT2G29910	AT2G29910	2	12751147	12753241	-	71	Promoter	70.5662
2_12813971_12814421	AT2G30020	AT2G30020	2	12814271	12816360	+	150	Promoter	88.881
2_13032972_13033447	WRKY21	AT2G30590	2	13033418	13035797	+	29	Promoter	84.033
2_13190446_13190745	AT2G30990	AT2G30990	2	13187407	13190458	-	12	Promoter	68.4115
2_13255660_13256218	AT2G31090	AT2G31090	2	13256091	13257068	+	127	Promoter	86.7263
2_13266589_13266868	AT2G31130	AT2G31130	2	13263520	13266565	-	24	Promoter	67.3341
2_13269115_13269531	AT2G31140	AT2G31140	2	13269889	13271811	+	358	Promoter	79.1849
2_13327442_13327837	APG9	AT2G31260	2	13321833	13327496	-	54	Promoter	96.4225
2_13349951_13350557	ARPC1B	AT2G31300	2	13345977	13350004	-	53	Promoter	143.287
2_13440003_13440274	GPX2	AT2G31570	2	13437974	13439923	-	80	Promoter	64.6408
2_13462435_13462778	ATX1	AT2G31650	2	13455272	13462431	-	4	Promoter	80.2623
2_13479236_13479615	AT2G31700	AT2G31700	2	13480510	13481568	+	895	Promoter	66.2568
2_13496040_13496315	AT2G31740	AT2G31740	2	13490794	13495267	-	773	Promoter	52.7899
2_13554620_13554918	SOBIR1	AT2G31880	2	13554870	13556977	+	48	Promoter	67.8728
2_13579453_13579943	AT2G31940	AT2G31940	2	13580371	13581134	+	428	Promoter	83.4943
2_13586570_13586854	CNX2	AT2G31955	2	13583985	13586703	-	133	Promoter	67.3341
2_13624492_13624818	CVL1	AT2G32010	2	13624751	13629255	+	67	Promoter	71.6435
2_13697344_13697627	CCT1	AT2G32260	2	13697457	13700648	+	113	Promoter	57.0993
2_13790127_13790466	ARASP	AT2G32480	2	13788517	13790077	-	50	Promoter	64.1021
2_13824512_13824765	AT2G32560	AT2G32560	2	13824663	13827260	+	102	Promoter	44.7099
2_13986687_13987016	PFA-DSP2	AT2G32960	2	13987669	13990994	+	653	Promoter	56.022
2_14244839_14245274	MLO5	AT2G33670	2	14244951	14248155	+	112	Promoter	80.2623
2_14261714_14262041	AT2G33710	AT2G33710	2	14258509	14260904	-	810	Promoter	53.8673
2_14534371_14534840	AT2G34480	AT2G34480	2	14532624	14534409	-	38	Promoter	85.649
2_14601519_14601791	ABCC2	AT2G34660	2	14602470	14612565	+	679	Promoter	50.6353
2_14652118_14652452	NF-YA4	AT2G34720	2	14649706	14651709	-	409	Promoter	68.4115
2_14768260_14768566	AT2G35040	AT2G35040	2	14765145	14768329	-	69	Promoter	53.8673
2_14884859_14885473	PLL1	AT2G35350	2	14881039	14884283	-	576	Promoter	123.356
2_14897743_14898183	AT2G35410	AT2G35410	2	14898256	14899750	+	73	Promoter	78.6463
2_14909944_14910303	AT2G35480	AT2G35480	2	14910343	14912048	+	40	Promoter	67.3341
2_14984985_14985518	CSLA07	AT2G35650	2	14985470	14988362	+	48	Promoter	91.5744
2_14990907_14991164	AT2G35658	AT2G35658	2	14990325	14990935	-	28	Promoter	51.1739
2_15040337_15040640	AT2G35790	AT2G35790	2	15040669	15042123	+	29	Promoter	54.406
2_15084653_15084964	PUB23	AT2G35930	2	15082855	15084559	-	94	Promoter	70.0275
2_15185448_15185818	AT2G36200	AT2G36200	2	15179817	15185405	-	43	Promoter	96.9611
2_15257277_15257617	ABCG34	AT2G36380	2	15257418	15263808	+	141	Promoter	70.5662
2_15439665_15439938	AT2G36810	AT2G36810	2	15425321	15439642	-	23	Promoter	56.5607
2_15444233_15444501	GAMMA-TIP	AT2G36830	2	15445294	15446621	+	793	Promoter	53.3286
2_15540055_15540380	SIGF	AT2G36990	2	15537225	15540139	-	84	Promoter	69.4888
2_15560571_15560833	PAL1	AT2G37040	2	15557367	15560755	-	78	Promoter	60.3314
2_15600482_15600859	AT2G37130	AT2G37130	2	15597921	15600154	-	328	Promoter	70.0275
2_15661721_15662115	AT2G37290	AT2G37290	2	15656427	15661735	-	14	Promoter	70.0275
2_15705774_15706287	ZAT11	AT2G37430	2	15706285	15707224	+	2	Promoter	93.7291
2_15763232_15763592	SLT1	AT2G37570	2	15761295	15763451	-	141	Promoter	73.2595
2_15829765_15830058	AT2G37750	AT2G37750	2	15830870	15831592	+	812	Promoter	64.6408
2_15889654_15890019	AT2G37960	AT2G37960	2	15886548	15889258	-	396	Promoter	68.9501
2_16017919_16018238	AT2G38250	AT2G38250	2	16018210	16020156	+	28	Promoter	70.0275
2_16042284_16042664	AMT2	AT2G38290	2	16039430	16042521	-	143	Promoter	73.7982
2_16063927_16064358	AT2G38330	AT2G38330	2	16064503	16067437	+	145	Promoter	80.2623
2_16074389_16074943	AT2G38370	AT2G38370	2	16071979	16074917	-	26	Promoter	99.1158
2_16090167_16090498	AT2G38410	AT2G38410	2	16086514	16090274	-	107	Promoter	74.8755
2_16115600_16115849	CIPK22	AT2G38490	2	16113909	16115204	-	396	Promoter	48.4806
2_16138397_16138675	AT2G38580	AT2G38580	2	16138570	16142657	+	105	Promoter	55.4833
2_16149660_16150257	AT2G38610	AT2G38610	2	16147106	16149934	-	274	Promoter	143.826
2_16156357_16156740	AT2G38630	AT2G38630	2	16153806	16156608	-	132	Promoter	75.4142
2_16187664_16187915	MAP65-5	AT2G38720	2	16188047	16192102	+	132	Promoter	52.2513
2_16194084_16194422	AT2G38730	AT2G38730	2	16192325	16194172	-	88	Promoter	56.5607
2_16216447_16216858	None	AT2G38800	2	16216752	16219159	+	106	Promoter	87.265
2_16265043_16265401	ERO2	AT2G38960	2	16265286	16268334	+	115	Promoter	72.1822
2_16328969_16329226	SVR1	AT2G39140	2	16330129	16333405	+	903	Promoter	52.7899
2_16423423_16423754	SAC3A	AT2G39340	2	16423541	16430108	+	118	Promoter	58.7154
2_16446158_16446507	AT2G39375	AT2G39375	2	16446514	16449180	+	7	Promoter	67.8728
2_16452426_16452709	AT2G39400	AT2G39400	2	16452612	16455001	+	97	Promoter	53.3286
2_16485729_16485978	ABCB6	AT2G39480	2	16477792	16485039	-	690	Promoter	47.9419
2_16530894_16531669	BIK1	AT2G39660	2	16531527	16533986	+	142	Promoter	116.892
2_16546731_16547037	EXPA4	AT2G39700	2	16543832	16545746	-	985	Promoter	71.1048
2_16568819_16569147	RHC2A	AT2G39720	2	16566586	16568960	-	141	Promoter	91.0357
2_16655420_16655878	PROT1	AT2G39890	2	16655577	16658412	+	157	Promoter	73.7982
2_16665643_16665996	ISA1	AT2G39930	2	16665851	16672494	+	145	Promoter	56.022
2_16680200_16680894	AT2G39950	AT2G39950	2	16676542	16680503	-	303	Promoter	126.049
2_16713982_16714421	NRPD1B	AT2G40030	2	16714460	16723718	+	39	Promoter	75.4142
2_16771755_16772062	CZF1	AT2G40140	2	16771997	16774734	+	65	Promoter	69.4888
2_16792618_16793103	AT2G40205	AT2G40205	2	16792175	16792622	-	4	Promoter	88.3424
2_16833112_16833758	FER4	AT2G40300	2	16831109	16833294	-	182	Promoter	97.4998
2_16873149_16873414	AtCaN2	AT2G40410	2	16873345	16875692	+	69	Promoter	51.7126
2_16896836_16897163	AT2G40460	AT2G40460	2	16896907	16901670	+	71	Promoter	61.4087
2_16918068_16918496	AT2G40510	AT2G40510	2	16918391	16919900	+	105	Promoter	74.8755
[truncated: 1,200 more rows]
