# Supplementary material for: Co-option and neofunctionalization of stomatal executors for defense against herbivores in Brassicales
Source: Research Square preprint supplement (doi:10.21203/rs.3.rs-3632546/v1), 2023-12-11
Supplement: Supplementary file 16 [file Supplementary_table4_231018.xlsx]

## Sheet: Sheet1
plants	source	identifier
Arabidopsis: Col-0	N/A	N/A
Arabidopsis: amiRNA-WSB_3	This study	N/A
Arabidopsis: ccs52a1-1	Larson-Rabin et al. Ref. 55; Takahashi et al. Ref. 57	SALK_083656
Arabidopsis: ccs52a1-1 MYR001:GUS	This study	N/A
Arabidopsis: ccs52a1-1 proFAMA:mScarlet-N7	This study	N/A
Arabidopsis: ccs52a1-5	Baloban et al. Ref. 56	SAIL_510_B04
Arabidopsis: ccs52a1-5 proFAMA:mScarlet-N7	This study	N/A
Arabidopsis: fama	ABRC; Ohashi-Ito and Bergmann Ref. 14	SALK_100073
Arabidopsis: fama AtFAMA:MpSETA	Moriya et al. Ref. 59	N/A
Arabidopsis: fama proAtFAMA:BdFAMA-mVenus	This study	N/A
Arabidopsis: fama/+or WT proAtFAMA:BdFAMA-mVenus	This study	N/A
Arabidopsis: fama proWSB:GUS	This study	N/A
Arabidopsis: iFAMA MYR001:GUS	Shirakawa et al. Ref. 24	N/A
Arabidopsis: iFAMAstrong	This study	N/A
Arabidopsis: iWSB-mVenus	This study	N/A
Arabidopsis: iWSB-mVenus MYR002:GUS	This study	N/A
Arabidopsis: MYR001:GUS	Shirakawa et al. Ref. 24	N/A
Arabidopsis: MYR002:GUS	Grunewald et al. Ref. 68	N/A
Arabidopsis: proCCS52A1:GUS	Larson-Rabin et al. Ref. 55; Takahashi et al. Ref. 57	N/A
Arabidopsis: proFAMA:FAMA-Myc	Matos et al.42	N/A
Arabidopsis: proFAMA:GFP	Lee et al. Ref. 63	N/A
Arabidopsis: proFAMA:H2B-tdTomato proUBQ11:mCitrine-RCI2A	This study	N/A
Arabidopsis: proFAMA:mScarlet-N7	This study	N/A
Arabidopsis: proHIPP20:GUS	This study	N/A
Arabidopsis: proSCAP1:GUS	Negi et al.21	N/A
Arabidopsis: proSCAP1:GUS amiRNA-WSB_3	This study	N/A
Arabidopsis: proSCAP1:nls-YFP proAtML1:mCherry-RCI2A	Lopez-Anido et al.54	N/A
Arabidopsis: proSCAP1(del):GUS	This study	N/A
Arabidopsis: proSCRM:GFP-SCRM	Kanaoka et al.17	N/A
Arabidopsis: proWSB:GUS	This study	N/A
Arabidopsis: proWSB:mTurquoise2-N7	This study	N/A
Arabidopsis: proWSB:mTurquoise2-N7 proSCAP1:nls-YFP proAtML1:mCherry-RCI2A	This study	N/A
Arabidopsis: scap1	Negi et al.21	N/A
Arabidopsis: scap1 gSCAP1-mVenus	This study	N/A
Arabidopsis: scrm	ABRC; Kanaoka et al.17	SALK_03155
Arabidopsis: scrm scrm2	Kanaoka et al.17	N/A
Arabidopsis: scrm-D	Kanaoka et al.17	N/A
Arabidopsis: scrm-D proWSB:GUS	This study	N/A
Arabidopsis: scrm2	ABRC; Kanaoka et al.17	SAIL_808_B10
Arabidopsis: syp22	Ueda et al.34	N/A
Arabidopsis: syp22 proSCAP1:GUS	This study	N/A
Arabidopsis: syp22 proWSB:GUS	This study	N/A
Arabidopsis: wsb scap1	This study	N/A
Arabidopsis: wsb scap1 gSCAP1-mCherry	This study	N/A
Arabidopsis: wsb scap1 gSCAP1-mVenus	This study	N/A
Arabidopsis: wsb scap1 gWSB-mTurquoise2	This study	N/A
Arabidopsis: wsb scap1 gWSB-mVenus	This study	N/A
Arabidopsis: wsb scap1 proFAMA:CYCD7-mVenus	This study	N/A
Arabidopsis: wsb-1	This study	N/A
Arabidopsis: wsb-1 gWSB-mTurquoise2 proTGG2:VENUS-2sc	This study	N/A
Arabidopsis: wsb-1 gWSB-mVenus	This study	N/A
Arabidopsis: wsb-1 gWSB-mVenus proFAMA:mCherry-RCI2A	This study	N/A
Arabidopsis: wsb-1 proFAMA:GFP	This study	N/A
Arabidopsis: wsb-1/wsb-2	This study	N/A
Arabidopsis: wsb-1/wsb-3	This study	N/A
Arabidopsis: wsb-2	This study	N/A
Arabidopsis: wsb-3	This study	N/A
Arabidopsis: wsb-3 MYR001:GUS	This study	N/A
Arabidopsis: wsb-3 proAtWSB:CpWSB MYR001:GUS	This study	N/A
Arabidopsis: wsb-3 proAtWSB:ThWSB MYR001:GUS	This study	N/A
Arabidopsis: wsb-3 proAtWSB:TpWSB MYR001:GUS	This study	N/A
Arabidopsis: wsb-4	This study	N/A
Arabidopsis: wsb-5	This study	N/A
Arabidopsis: wsb-6	This study	N/A
Arabidopsis: wsb-7	This study	N/A
Arabidopsis: wsb-8	This study	N/A
Arabidopsis: wsb-9	This study	N/A
