# Supplementary material for: Co-option and neofunctionalization of stomatal executors for defense against herbivores in Brassicales
Source: Research Square preprint supplement (doi:10.21203/rs.3.rs-3632546/v1), 2023-12-11
Supplement: Supplementary file 21 [file Supplementary_table5_231018.xlsx]

## Sheet: cloning
	name	sequences (from 5' to 3')	purpose
1	MS674_ERF51proFwd	caccGAAGAAGCGTTTATTGCCGCCGGAG	cloning of WSB promoter for D-TOPO
2	MS792_ERF51p5PRIMETOPO_F	GAAGAAGCGTTTATTGCCGCCGGAGTGTG	cloning of WSB promoter for 5'-TOPO
3	MS793_ERF51p5PRIMETOPO_R	TTGTGTTGTAGTGGAGAAGAAGATTGATAGTG	cloning of WSB promoter for D/5'-TOPO
4	MS720_AscI_ERF51_fwd	ctacaacacaaaagggtgggATGGAGAAATCATCCTCAAT	cloning of pWSB:WSB-mVENUS/mTurquoise2 constructs
5	MS722_AscI_xFP_Rev	GTACAAGAAAGCTGGGTCGGTTACTTGTACAGCTCGTCCA	cloning of pWSB:WSB-mVENUS/mTurquoise2 constructs
6	MS723_ERF51GGSGxFP_rev	CTTGCTCACCATGCCTGACCCACCATCTAAGCTTCCGTAGTAGT	cloning of pWSB:WSB-mVENUS/mTurquoise2 constructs
7	MS724_ERF51GGSGxFP_fwd	GGAAGCTTAGATggtgggtcaggcatggtgagcaagggcgag	cloning of pWSB:WSB-mVENUS/mTurquoise2 constructs
8	MS652_at3g57600F	caccATGGAGAAATCATCCTCAATGAAACA	cloning of WSB-mVENUS
9	MS1211_mVENUS_rev	TTACTTGTACAGCTCGTCCATGCCGAGAGT	cloning of WSB-mVENUS/SCAP1-mVenus
10	MS1276_SCAP1p_fwd_delta_binding	caccTTTCTTCACAGATGGAGACGTTTAATATATCAATCATC	cloning of SCAP1 67bp_del promoter
11	MS1235_SCAP1pro_rev	GGTGATGATGATGGGAGGAGAGAAAGATGA	cloning of SCAP1 67bp_del promoter
12	MS1275_SCAP1p_fwd	caccCTCACGAGAGATCCATTCCTCGAGGGC	cloning of pSCAP1:SCAP1-mVENUS/mCherry constructs
13	MS1290_hotfusion_SCAP1_fwd	TCATCATCACCAAGGGTGGGATGTCCTCCCATACCAATCTCC	cloning of pSCAP1:SCAP1-mVENUS constructs
14	MS1209_gSCAP1_mVENUSmCherry_fw	AATGCATTGCCTGGTGGGTCAGGCATGGTGAGCAAGGGCGAG	cloning of pSCAP1:SCAP1-mVENUS/mCherry constructs
15	MS1210_gSCAP1_mVENUSmCherry_re	CTTGCTCACCATGCCTGACCCACCAGGCAATGCATTATAATG	cloning of pSCAP1:SCAP1-mVENUS/mCherry constructs
16	MS1291_hotfusion_mVENUS_rev	GTACAAGAAAGCTGGGTCGGTTACTTGTACAGCTCGTCCATG	cloning of pSCAP1:SCAP1-mVENUS constructs
17	MS1292_hotfusion_mCherry_rev	GTACAAGAAAGCTGGGTCGGCTACTTGTACAGCTCGTCCATG	cloning of pSCAP1:SCAP1-mCherry constructs
18	MS498_Venus_fwd	caccATGGTGAGCAAGGGCGAG	cloning of mTurquoise2-N7
19	MS619_mTur2_G4S_N7_rev	AATTCGCTACCTCCGCCTCCCTTGTACAGCTCGTCCAT	cloning of mTurquoise2-N7
20	MS620_mTur2_G4S_N7_fwd	ACAAGGGAGGCGGAGGTAGCGAATTCAAGCGTGAAGAG	cloning of mTurquoise2-N7
21	MS145_N7_Rev	GTACAAGAAAGCTGGGTCGGTTACTCTTCTTCTTGATCAG	cloning of mTurquoise2-N7
22	MS913_HIPP20proFwd	caccAGTGGGTTTCATGGCTCTGTTTTCTC	cloning of HIPP20 promoter
23	MS914_HIPP20proRev	GTCTATTACTCTCACCAAGAAAGATCAGAG	cloning of HIPP20 promoter
24	MS257_pFAMA_F	CCAAACTTCATGTATGATTCCAAACTGGTA	cloning of FAMA promoter for 5'-TOPO
25	MS258_pFAMA_R	TGCTATTCGTGGTAGTTGATTATAAACTGC	cloning of FAMA promoter for 5'-TOPO
26	MS1260_SCAP1_ATG_cacc	caccATGTCCTCCCATACCAATCTCCCCTC	cloning of SCAP1-mVenus for D-TOPO
27	MS1734_Tp5g05010_fwd	caccATGGAGAAATCCTCTAGCATGAAACAGTGG	cloning of TpWSB for D-TOPO
28	MS1735_Tp5g05010_rev	TCACTCATCCAAGCTTCCACAGAAGTTCCA	cloning of TpWSB for D-TOPO
29	MS1736_CleomeWSB_fwd	caccATGGATTCATACCGTAAGCCATCACCTCTT	cloning of ThWSB for D-TOPO
30	MS1737_CleomeWSB_rev	TCAGTCAAGAGACTCGCAAAAGTTCCAGAT	cloning of ThWSB for D-TOPO
31	MS1739_CpWSB_285_fwd	caccATGGAGAACTACAGAAGATCACCCTTCAAA	cloning of CpWSB for D-TOPO
32	MS1740_CpWSB_rev	TCAAAAATTCCAAACGGATGTAGTGAAGGT	cloning of CpWSB for D-TOPO
33	MS1720_CYCD7-mVENUS_1	CACCATGGATAATCTACTCTGCGAAGAATC	cloning of CYCD7-mVENUS for D-TOPO
34	MS1721_CYCD7-mVENUS_2	CCTGACCCACCAATGTAATTTGACATTTCAATTGTCATTCTTTTTGCCGG	cloning of CYCD7-mVENUS for D-TOPO
35	MS1722_CYCD7-mVENUS_3	TGACAATTGAAATGTCAAATTACATTGGTGGGTCAGGCATGGTGAGCAAG	cloning of CYCD7-mVENUS for D-TOPO
36	MS1723_CYCD7-mVENUS_4	TTACTTGTACAGCTCGTCCATGCCGAGAGT	cloning of CYCD7-mVENUS for D-TOPO
37	MS1548_UBQ11pFwd	CACCAACTTAAAGACCACCAAGACCAAAAAGTG	cloning of UBQ11 promoter for 5'-TOPO
38	MS1549_UBQ11pRev	CTGTTAATCAGAAAAACCGAGATTAATCGACAAATTCGATC	cloning of UBQ11 promoter for 5'-TOPO
39	MS263_mCitrineRCI2A_F	ATGGTGAGCAAGGGCGAGGAGCTGTTCACC	cloning of mCitrineRCI2A for D-TOPO
40	MS264_mCitrineRCI2A_R	ATGAAATGATAGCGTAAGGTATAAGGTATA	cloning of mCitrineRCI2A for D-TOPO
41	MS504_mSca_fwd	caccATGGTGAGCAAGGGCGAGGCAGTGAT	cloning of mScarlet-N7for D-TOPO
42	MS505_mScaG4SN7_rev	ACGCTTGAATTCGCTACCTCCGCCTCCCTTGTACAG	cloning of mScarlet-N7for D-TOPO
43	MS506_mScaG4SN7_fwd	GGAGGCGGAGGTAGCGAATTCAAGCGTGAAGAGCAA	cloning of mScarlet-N7for D-TOPO
44	MS507_mSca_rev	CTACTTGTACAGCTCGTCCATGCCGCCGGT	cloning of mScarlet-N7for D-TOPO
45	MS1797_BdFAMA_fwd	caccATGGAGAAGCAATCAGAGCAGGGTAG	cloning of BdFAMA-mVenus for D-TOPO
46	MS1811_BdFAMAmVENUS_rev	CACCATGCCTGACCCACCTAGCGTATAGTTGATGTCAATAAAGCTTAGTA	cloning of BdFAMA-mVenus for D-TOPO
47	MS1812_BdFAMAmVENUS_fwd	ATACGCTAGGTGGGTCAGGCATGGTGAGCA	cloning of BdFAMA-mVenus for D-TOPO
48	MS1813_mVENUS_rev	TTACTTGTACAGCTCGTCCATGCCGAGAGT	cloning of BdFAMA-mVenus for D-TOPO
49	MS1562_mCherry_fwd1	caccATGGTGAGCAAGGGCGAGGAGGATAA	cloning of mCherryRCI2A for D-TOPO
50	MS1563_mCherryRCI2Ag_rev1	AGCTGTACTCATGCCTGACCCACCCTTGTACAGCTCGTCCATGCCGCCGG	cloning of mCherryRCI2A for D-TOPO
51	MS1564_mCherryRCI2Ag_fwd2	GGTGGGTCAGGCATGAGTACAGCTACTTTCGTTGATATTATTATCGCCAT	cloning of mCherryRCI2A for D-TOPO
52	MS1565_RCI2Ag_rev2	GTATCACGTCGCCTTTGAATTGGTTAATATATGATTGGTTCTTAG	cloning of mCherryRCI2A for D-TOPO

## Sheet: amiRNA
	name	sequences (from 5' to 3')	purpose
1	MS086_amiA_CACC	caccCTGCAAGGCGATTAAGTTGGGTAAC	cloning of amiRNA against WSB
2	MS087_amiB	GCGGATAACAATTTCACACAGGAAACAG	cloning of amiRNA against WSB
3	MS775_ERF51_I miR-s_3	gaTGAATGACACTCTGCTAGCTCtctctcttttgtattcc	cloning of amiRNA against WSB_3
4	MS776_ERF51_II miR-a_3	gaGAGCTAGCAGAGTGTCATTCAtcaaagagaatcaatga	cloning of amiRNA against WSB_3
5	MS777_ERF51_III miR*s_3	gaGAACTAGCAGAGTCTCATTCTtcacaggtcgtgatatg	cloning of amiRNA against WSB_3
6	MS778_ERF51_IV miR*a_3	gaAGAATGAGACTCTGCTAGTTCtctacatatatattcct	cloning of amiRNA against WSB_3
7	MS787_ERF51_I miR-s_6	gaTATTCACGTTTAGCGTACCACtctctcttttgtattcc	cloning of amiRNA against WSB_6
8	MS788_ERF51_II miR-a_6	gaGTGGTACGCTAAACGTGAATAtcaaagagaatcaatga	cloning of amiRNA against WSB_6
9	MS789_ERF51_III miR*s_6	gaGTAGTACGCTAAAGGTGAATTtcacaggtcgtgatatg	cloning of amiRNA against WSB_6
10	MS790_ERF51_IV miR*a_6	gaAATTCACCTTTAGCGTACTACtctacatatatattcct	cloning of amiRNA against WSB_6

## Sheet: genotyping
	name	sequences (from 5' to 3')	purpose
1	MS011_LBa1	TGGTTCACGTAGTGGGCCATCG	left border prmer
2	MS012_LB1	GCCTTTTCAGAAATGGATAAATAGCCTTGCTTCC	left border prmer
3	MS001_fama-1_RP	GTCTTCTTCTACTATCTTGCATGTCTTG	genotyping for fama-1
4	MS002_fama-1_LP	TCGTAACATTCTTGTTCTCCCTATC	genotyping for fama-1
5	MS1159_ERF51g_F1	GTCTCGCTAGATATCTTGGTAACATGTACAAG	genotyping for wsb
6	MS1160_ERF51g_R1	CATATTGTCTGTTTCTCCCTTGCTGGTCTT	genotyping for wsb
7	MS1539_SCAP13UTRg_fwd	ACCAGATCACCGTATCTCCGGTACATC	genotyping for scap1
8	MS1540_SCAP13UTRg_rev	GACATATGATGTGGATGGTCAGTTATTCTGCTTG	genotyping for scap1
9	MS003_scrm_RP	AGCTTGTTTACTTGTTGCTGTTATAGAG	genotyping for scrm
10	MS004_scrm_LP	GTTTTTCTTCACTCTTACATCATCAAAG	genotyping for scrm
11	MS005_scrm2_RP	ACGGAGAAGAAGAAGAAGAAGAATC	genotyping for scrm2
12	MS006_scrm2_LP	GATTTTATCTTAAAGGGACCATTGC	genotyping for scrm2

## Sheet: CRISPR Cas9
	name	sequences (from 5' to 3')	purpose
1	14419_AT3G57600_9_F	tcgaagtagtgattgCCAAGAAGAGGGCAAGACTTgttttagagctagaaatagcaagttaaaat	CRISPR/Cas9 vector construction
2	14420_AT3G57600_11_R	ttctagctctaaaacTAGAGTTTCAAGGCAGCCTCtgcaccagccgggaa	CRISPR/Cas9 vector construction

## Sheet: qPCR
	name	sequences (from 5' to 3')	purpose
1	MS708_qPCR_FAMA_Fwd1	GGATTTGGAGCAACACCTTTT	qPCR for FAMA
2	MS709_qPCR_FAMA_Rev1	CTTGGTTTCTGGTCTGGTTCA	qPCR for FAMA
3	MS718_ERF51qPCR_F	GTACCGTGGAGTCAGGCAAA	qPCR for WSB
4	MS719_ERF51qPCR_R	TCAGCTGTAGCGAAAGAGCC	qPCR for WSB
5	MS226_TGG1F_ex7	TAAGGATGACCAAAAAGGTATGA	qPCR for TGG1
6	MS227_TGG1R_ex8	CACTGAACTCTGGAAGCCGA	qPCR for TGG1
7	MS228_TGG2F_ex7	AAACAAGCAACTTGGAGGGCC	qPCR for TGG2
8	MS229_TGG2R_ex8	AGGGCGTGGGCGTATTGAGT	qPCR for TGG2
9	MS769_WRKY23_F	AGTCTCGGTAATGGTTGCTTTGG	qPCR for WRKY23
10	MS770_WRKY23_R	TGTTGCTGCTGTTGGTGATGG	qPCR for WRKY23
11	MS731_SCAP1qPCR_F	GCCGACGAAGAAAGGAGATA	qPCR for SCAP1
12	MS732_SCAP1qPCR_R	TCCAAGCTTGAATTCCATTG	qPCR for SCAP1
13	MS804_EPF1_qPCR_fwd	ATGCCGTCTTGTGATGGTTAG	qPCR for EPF1
14	MS805_EPF1_qPCR_rev	TCAAGGGACAGGGTAGGACTT	qPCR for EPF1
15	MS727_BIM1qPCR_F	TGGAGTAACAACAACCAACAGC	qPCR for BIM1
16	MS728_BIM1qPCR_R	CTTGTGCAGTTGCAAGGACC	qPCR for BIM1
17	MS800_TMM_qPCR_fwd	AAAACGCGTTCAAAGGGCTC	qPCR for TMM
18	MS801_TMM_qPCR_rev	GGTGAAGGACCCGAAGACTG	qPCR for TMM
19	MS802_POLAR_qPCR_fwd	CCCAGCGTGTTCCTGAATCT	qPCR for POLAR
20	MS803_POLAR_qPCR_rev	GTGCGGTGTATCGAACATGC	qPCR for POLAR
21	MS1709_CYCD5_fwd	GACACCTCCACCGGAAATAG	qPCR for CYCD5
22	MS1710_CYCD5_rev	TCTTGGCTGGTGGAGAACTT	qPCR for CYCD5
23	MS1711_CYCD7_fwd	CGGTATGGTTGGGGATCATA	qPCR for CYCD7
24	MS1712_CYCD7_rev	ACGCTTGGTGGGTATTGAAG	qPCR for CYCD7
25	MS710_qPCR_ACT2_Fwd1	GATGAGGCAGGTCCAGGAATC	qPCR for ACT2
26	MS711_qPCR_ACT2_Rev1	AACCCCAGCTTTTTAAGCCTTT	qPCR for ACT2

## Sheet: ChIP_qPCR
	name	sequences (from 5' to 3')	purpose
1	MS814_WSBpChIP_P2fwd	agcatgggataatggtgaaggg	WSB_Pro
2	MS815_WSBpChIP_P2rev	tcgcagcacacaagaatcac	WSB_Pro
3	MS822_WSBpChIP_P6fwd	gagacataggtagtgagagtgcag	WSB_UTR
4	MS823_WSBpChIP_P6rev	caactcggttgtacactgactc	WSB_UTR
5	MS806_EPF1p_ChIP_Fwd1	TGTTCGATCTTGTTTTCATGTG	EPF1
6	MS807_EPF1p_ChIP_Rev1	AATAGTACGGCGAGAAACAAGG	EPF1
7	MS1117_TA3_fwd	CTGCGTGGAAGTCTGTCAAA	NC
8	MS1118_TA3_rev	CTATGCCACAGGGCAGTTTT	NC
9	MS1167_SCAP1_P2_F	ggatgatcggtttagtctcacg	SCAP1_Pro
10	MS1168_SCAP1_P2_R	gtgaagaaacacgagagaacgg	SCAP1_Pro
11	MS1179_SCAP1_3UTR_1F	tcggaaagctcttggtttgg	SCAP1_UTR
12	MS1180_SCAP1_3UTR_1R	aaccttgggataacaaccatcc	SCAP1_UTR
13	MS1093_TMMp_qPCR_5_fwd	TCCTCGAGTTATCCCGTGAAAG	TMM
14	MS1094_TMMp_qPCR_5_rev	TGTGAATGCGGTTTAGGTTCG	TMM
